# Supplementary material for: Adiposity measures and arterial stiffness in primary care: the MARK prospective observational study
Source: PubMed Central journal article supplement (PMC5623460; doi:10.1136/bmjopen-2017-016422), 2017-09-27
Supplement: bmjopen-2017-016422.draft_revisions.pdf [file bmjopen-2017-016422.draft_revisions.pdf]

# BMJ Open

BMJ Open is committed to open peer review. As part of this commitment we make the peer review history of every article we publish publicly available.

When an article is published we post the peer reviewers' comments and the authors' responses online. We also post the versions of the paper that were used during peer review. These are the versions that the peer review comments apply to.

The versions of the paper that follow are the versions that were submitted during the peer review process. They are not the versions of record or the final published versions. They should not be cited or distributed as the published version of this manuscript.

BMJ Open is an open access journal and the full, final, typeset and author-corrected version of record of the manuscript is available on our site with no access controls, subscription charges or pay-per-view fees (<http://bmjopen.bmj.com>).

If you have any questions on BMJ Open's open peer review process please email [editorial.bmjopen@bmj.com](mailto:editorial.bmjopen@bmj.com)

# BMJ Open

## Title: Adiposity measures and arterial stiffness: the MARK prospective observational study.

|                                 |                                                                                                                                                                                                                                                                                                                                                                                                                                                                                                                                                                                                                                                                                                                                                                                                                                                                                                                                                                                                            |
|---------------------------------|------------------------------------------------------------------------------------------------------------------------------------------------------------------------------------------------------------------------------------------------------------------------------------------------------------------------------------------------------------------------------------------------------------------------------------------------------------------------------------------------------------------------------------------------------------------------------------------------------------------------------------------------------------------------------------------------------------------------------------------------------------------------------------------------------------------------------------------------------------------------------------------------------------------------------------------------------------------------------------------------------------|
| Journal:                        | <i>BMJ Open</i>                                                                                                                                                                                                                                                                                                                                                                                                                                                                                                                                                                                                                                                                                                                                                                                                                                                                                                                                                                                            |
| Manuscript ID                   | bmjopen-2017-016422                                                                                                                                                                                                                                                                                                                                                                                                                                                                                                                                                                                                                                                                                                                                                                                                                                                                                                                                                                                        |
| Article Type:                   | Research                                                                                                                                                                                                                                                                                                                                                                                                                                                                                                                                                                                                                                                                                                                                                                                                                                                                                                                                                                                                   |
| Date Submitted by the Author:   | 13-Feb-2017                                                                                                                                                                                                                                                                                                                                                                                                                                                                                                                                                                                                                                                                                                                                                                                                                                                                                                                                                                                                |
| Complete List of Authors:       | Gomez-Sanchez, Leticia<br>Garcia-Ortiz, Luis; La Alamedilla health centre. University of Salamanca, Primary care research unit La Alamedilla<br>Patino-Alonso, Maria<br>Recio-Rodriguez, Jose; La Alamedilla Health Center, Primary Care Research Unit, The Alamedilla Health Center, Castilla and León Health Service (SACYL), Biomedical Research Institute of Salamanca (IBSAL)<br>Frigo, Fernando<br>Marti, Rhut<br>Agudo-Conde, Cristina; La Alamedilla Health Center,, Research Unit<br>Rodriguez-Sanchez, Emiliano; Primary Care Research Unit, The Alamedilla Health Center, Salamanca, Spain, ; Biomedical Research Institute of Salamanca (IBSAL),<br>Maderuelo-Fernandez, Jose; Salamanca Institute for Biomedical Research. (IBSAL)., Primary care research unit La Alamedilla, Castilla and León Health Service (SACYL). Network of Preventive Activities and Health Promotion in Primary Care (REDIAPP)<br>Ramos, Rafel; Universidad de Girona. Departament Medicina<br>Gomez-Marcos, Manuel |
| <b>Primary Subject Heading</b>: | Cardiovascular medicine                                                                                                                                                                                                                                                                                                                                                                                                                                                                                                                                                                                                                                                                                                                                                                                                                                                                                                                                                                                    |
| Secondary Subject Heading:      | Diabetes and endocrinology, Epidemiology, Nutrition and metabolism                                                                                                                                                                                                                                                                                                                                                                                                                                                                                                                                                                                                                                                                                                                                                                                                                                                                                                                                         |
| Keywords:                       | Body mass index, Waist circumference, Waist-to-height ratio, Fat mass percent., Body roundness index., Arterial stiffness                                                                                                                                                                                                                                                                                                                                                                                                                                                                                                                                                                                                                                                                                                                                                                                                                                                                                  |
|                                 |                                                                                                                                                                                                                                                                                                                                                                                                                                                                                                                                                                                                                                                                                                                                                                                                                                                                                                                                                                                                            |

SCHOLARONE™  
Manuscripts

**Title: Adiposity measures and arterial stiffness: the MARK prospective observational study.**

**Authors:** Leticia Gomez-Sanchez MD <sup>1\*</sup>, Luis Garcia-Ortiz MD, PhD <sup>1,2,3</sup>, Maria C Patino-Alonso PhD <sup>1,2,4</sup>, Jose I Recio-Rodriguez PhD <sup>1,2,5</sup>, Rigo Fernando MD, PhD <sup>6</sup>, Ruth Marti PhD <sup>7,8</sup>, Cristina Agudo-Conde <sup>1,2</sup>, Emiliano Rodriguez-Sanchez MD, PhD <sup>1,2,9</sup>, Jose A Maderuelo-Fernandez MD, PhD <sup>1,2</sup>, Rafel Ramos MD, PhD <sup>7,8,10</sup> and Manuel A Gomez-Marcos MD, PhD <sup>1,2,9</sup> for the MARK Group <sup>11</sup>

1. Primary Care Research Unit, the Alamedilla Health Center, Castilla and León Health Service (SACyL), Salamanca, Spain.
2. Biomedical Research Institute of Salamanca (IBSAL), Salamanca, Spain.
3. Biomedical and diagnostic sciences department, University of Salamanca, Salamanca, Spain.
4. Statistics Department, University of Salamanca, Salamanca, Spain.
5. Department of Nursing and Physiotherapy, University of Salamanca, Salamanca, Spain.
6. San Agustín Health Center, Illes Balears Health Service (IBSALUT), Palma of Mallorca, Spain.
7. Unitat de Suport a la Recerca de Girona. Institut Universitari d'Investigació en Atenció Primària Jordi Gol (IDIAP Jordi Gol), Girona, Spain.
8. Institut d'Investigació Biomèdica of Girona Dr. Josep Trueta (IDBGI). Girona, Spain.
9. Department of Medicine, University of Salamanca, Salamanca, Spain.
10. Departament de Ciències Mèdiques, Facultat de Medicina. Universitat de Girona, Spain.
11. MARK Group. redIAPP: Research Network in Preventive Activities and Health Promotion, Girona, Spain.

**\*Corresponding Author:**

Leticia Gomez-Sanchez, Primary Care Research Unit, Alamedilla Health Care Center.  
37003 Salamanca, Spain.

Full list of author information is available at the end of the article.

## ABSTRACT

**Background:** Increased arterial stiffness is one possible mechanism of increased cardiovascular risk from obesity.

**Objective:** This study investigates the relationship of adiposity measures with arterial stiffness in Caucasian adults with intermediate cardiovascular and determines measures with greater power to explain arterial stiffness.

**Setting:** 6 primary care centres in in three Spanish Autonomous Communities, Spain.

**Participants:** This study analyzed 2354 subjects (age 35–74 years (mean 61.4±7.7 years), 61.9% male).

**Methods:** The study was based on cross-sectional data from the MARK study. The main outcome variables were: body mass index (BMI), waist-to-height ratio (WHtR), University clinic of Navarra body adiposity estimation (CUN-BAE) body fat percentage, and body roundness index (BRI). Vascular function was assessed by the cardio-ankle vascular index (CAVI) with the VaSera device, and brachial ankle pulse wave velocity (baPWV) was determined using a validated equation.

**Results:** The mean adiposity measures were a BMI of 29.2±4.4, WHtR of 0.61±0.07, CUN-BAE of 35.7±1.7, and BRI of 5.8±1.7. The mean stiffness measures were a CAVI of 8.8±1.2 and baPWV of 14.9±2.5. In multiple linear regression analysis, all adiposity measures were negatively associated with CAVI and baPWV ( $p<0.01$  in all) after adjustment for cardiovascular risk factors. The proportions of CAVI variability explained in the respective by the adiposity measures were 7.5% for BMI, 7.2% for CUN-BAE, 4.3% for WHtR, and 4.1% for BRI, which were higher among diabetic, obese, younger ( $\leq 62$  years), and non-hypertensive subjects.

1  
2  
3 **Conclusions:** Adiposity measures are negatively associated with arterial stiffness measures.  
4  
5 The explanatory capacity of the variability of arterial stiffness is higher for BMI and CUN-  
6  
7 BAE and when using CAVI as a measure of stiffness rather than baPWV.  
8

9  
10 **Trial Registration:** Clinical Trials.gov Identifier: [https://clinicaltrials.gov/ct2/show/](https://clinicaltrials.gov/ct2/show/NCT01428934)  
11  
12 NCT01428934. Registered 2 September 2011. Last updated September 8, 2016.  
13

14 **Keywords:** Body mass index. Waist circumference. Waist-to-height ratio. Fat mass percent.  
15  
16 Body roundness index. Arterial stiffness.  
17

### 18 **Strengths and limitations of this study**

- 19
- 20 • This is the first study to investigate the association between adiposity measures with  
21 the cardio-ankle vascular index with and brachial ankle pulse wave velocity in  
22 Caucasian adults with intermediate cardiovascular risk.  
23
  - 24 • All adiposity measures were negatively associated with CAVI and baPWV.  
25
  - 26 • The explanatory capacity of the variability of arterial stiffness is higher for BMI and  
27 CUN-BAE and when using CAVI as a measure of stiffness rather than baPWV.  
28
  - 29 • The main limitation of our study is its cross-sectional design, which does not allow us  
30 to establish causal relations or the direction of influence of adiposity measures in  
31 vascular function.  
32  
33  
34  
35  
36  
37  
38  
39  
40  
41  
42  
43  
44  
45  
46  
47  
48  
49  
50  
51  
52  
53  
54  
55  
56  
57  
58  
59  
60

## INTRODUCTION

Obesity has been linked to increased all-cause and cardiovascular mortality<sup>(1)</sup>. However, the mechanisms through which obesity can increase the frequency of cardiovascular disease beyond traditional risk factors are not clearly identified<sup>(2)</sup>. Arterial stiffness as evaluated by the brachial ankle pulse wave velocity (baPWV) is an independent predictor of coronary heart disease and mortality in both the general population<sup>(3)</sup> and in patients with diabetes mellitus<sup>(4; 5)</sup>. Similarly, the cardio-ankle vascular index (CAVI) is associated with carotid and coronary atherosclerosis<sup>(6; 7; 8)</sup> and is a predictor of cardiovascular events in obese patients<sup>(9)</sup>. Increased arterial stiffness may be one of the mechanisms by which obesity increases cardiovascular risk independently of traditional risk factors. However, the relation between adiposity and arterial stiffness remains controversial. Thus the body mass index (BMI) has been associated with arterial stiffness in the general population<sup>(10; 11)</sup>, and in diabetic patients<sup>(12; 13)</sup>. However, other works have not found this association<sup>(14)</sup>, the association disappeared after adjusting for potential confounders<sup>(13)</sup>, or showed a negative association<sup>(15; 16)</sup>. On the other hand, there are studies that suggest a greater correlation of measures of central or visceral adiposity than measures of general adiposity with arterial stiffness in the general population<sup>(10; 17; 18; 19; 20)</sup>, in diabetic patients<sup>(13)</sup>, and in diabetics and hypertensive patients<sup>(21)</sup>. The Whitehall II Cohort study<sup>(22)</sup>, found that all measures of general adiposity, central adiposity, and body fat percentage were predictors of accelerated arterial stiffness in adults. Cardiovascular events are more likely to occur in patients with intermediate cardiovascular risk<sup>(23)</sup>, and there is a lack of studies analyzing the relationship of different adiposity measures with arterial stiffness in such subjects. Thus, the primary aim of this study is to investigate the relationship between adiposity measures and arterial stiffness in Caucasian adults with intermediate cardiovascular risk. The secondary aim is to determine which adiposity measures have greater power to explain arterial stiffness.

## METHODS

### Study design

This trial is a cross-sectional study of subjects recruited to the *improving interMediAte RiSk management (MARK)* study (NCT01428934)<sup>(24)</sup>, which is a longitudinal study designed to assess whether the ankle-brachial index, arterial stiffness (measured by CAVI), postprandial glucose, glycosylated hemoglobin, self-measured blood pressure, and the presence of comorbidities are independently associated with the occurrence of vascular events. It also investigates whether the predictive capacity of current risk equations can be improved in the intermediate risk population. The current study focuses on the baseline visit. The second step will be a 5- and 10-year follow-up trial to assess cardiovascular morbidity and mortality.

### Study population

In this multicenter project, study population was performed by random sampling from subjects who met the inclusion criteria and were seeing general practitioners from July 2011 to June 2013 at six primary care centers in three Spanish Autonomous Communities. Subjects were recruited from those aged 35 to 74 years with intermediate cardiovascular risk, defined as 10-year coronary risk ranging from 5%–15% according to the adapted Framingham risk equation<sup>(25)</sup>; 10-year vascular mortality risk ranging from 1%–5% according to the scoring risk in Europeans equation<sup>(26)</sup>; or moderate risk according to the European Society of Hypertension guidelines for the management of arterial hypertension<sup>(27)</sup>. Exclusion criteria included end-stage disease or institutionalization at the time of the visit, or history of atherosclerotic disease. This study analyzed 2354 of the 2495 subjects recruited in the MARK study, and the grounds for exclusions are shown in figure 1.

### Variables and measurement instruments

A detailed description of procedures for clinical data collection and laboratory tests has been published elsewhere<sup>(24)</sup>.

### Anthropometric measurements

Body weight was measured twice with a certified electronic scale (Seca 770, Medical scale and measurement systems, Birmingham, United Kingdom) after adequate calibration (precision  $\pm 0.1$  kg). Readings were rounded to 100 g. Height was measured with a stadiometer (Seca 222), and the average of two measurements was recorded. Body mass index (BMI) was calculated as weight (kg) divided by height squared ( $m^2$ ). Waist circumference was measured according to the 2007 recommendations of the Spanish Society for the Study of Obesity<sup>(29)</sup>. All measurements were performed with the subjects standing, wearing no shoes, and in light clothing. Waist to height ratio (WHtR) was calculated as waist circumference (cm) divided by height (cm)<sup>(30; 31)</sup>.

The body fat percentage (BF%) was calculated according University clinic of Navarra - body adiposity estimator (CUN-BAE) to the recommendations of Gomez-Ambrosi J et al<sup>(32)</sup>.

$BF\% = -44.988 + (0.503 \times \text{Age}) + (10.689 \times \text{gender}) + (3.172 \times \text{BMI}) - (0.026 \times \text{BMI}^2) + (0.181 \times \text{BMI} \times \text{gender}) - (0.02 \text{ BMI} \times \text{Age}) - (0.005 \times \text{BMI}^2 \times \text{gender}) + (0.00021 \times \text{BMI}^2 \times \text{Age})$  where male=0 and female=1 for gender.

Body Roundness Index (BRI), was calculated using formula as  $BRI = 364.2 - 365.5 \times$

$\sqrt{1 - \frac{(WC/(2\pi))^2}{(0.5 \text{ height})^2}}$ <sup>(33)</sup>. BRI could predict the percentage of body fat and visceral adipose tissue.

### Cardio-ankle vascular index (CAVI) and brachial-ankle pulse wave velocity (baPWV)

CAVI was measured using a *VaSera VS-1500*® device (*Fukuda Denshi*)<sup>(34; 35)</sup>. CAVI values are calculated automatically by estimating the stiffness parameter  $\beta$  with the following equation:  $\beta = 2\rho \times l / (P_s - P_d) \times \ln(P_s / P_d) \times PWV^2$ , where  $\rho$  is blood density,  $P_s$  and  $P_d$  are SBP and DBP in mmHg, and PWV is measured between the aortic valve and the ankle<sup>(36)</sup>.

The mean coefficient of variation of CAVI measurement is less than 5%, which is small enough to allow for clinical use of the index and confirms that CAVI has a favorable



1  
2  
3 reproducibility<sup>(35)</sup>. baPWV was estimated using the equation,  $baPWV = (0.5934 \times \text{height (cm)} + 14.4724)/tba$  (tba is the time interval between the arm and ankle waves)<sup>(37)</sup>.

4  
5  
6  
7 Measurements were performed with the patient in supine position after resting for 10 minutes  
8  
9 in a quiet room at a stable temperature. Subjects were instructed not to smoke or practice  
10  
11 exercise in the hour prior to the test.

### 12 13 14 **Diagnosis of cardiovascular risk factors**

15  
16 Subjects were considered hypertensive if previously diagnosed with hypertension, if they  
17  
18 were taking antihypertensive drugs, or if they had blood pressure levels  $\geq 140/90$  mmHg.

19  
20 Diabetic subjects were those who had a previous diagnosed of the disease, were taking  
21  
22 hypoglycemic drugs, or had fasting blood glucose levels  $\geq 126$  mg/dL or HbA1c  $\geq 6.5\%$ .

23  
24 Dyslipidemia was defined as a prior diagnosis of the condition, use of lipid-lowering drugs, or  
25  
26 fasting total cholesterol levels  $\geq 250$  mg/dL.

27  
28  
29 **Office or clinical blood pressure:** Office blood pressure measurement involved three  
30  
31 measurements of SBP and DBP with a validated OMRON model M10-IT  
32  
33 sphygmomanometer (Omron Health Care, Kyoto, Japan). The measurements followed the  
34  
35 recommendations of the European Society of Hypertension<sup>(38)</sup>, and the averages of the last  
36  
37 two measurements were used.

### 38 39 40 **Lifestyles**

41  
42  
43 **Tobacco:** Smoking history was assessed by asking questions about the participant's smoking  
44  
45 status (smoker/non-smoker). We considered smokers to include those who currently smoke or  
46  
47 who have stopped smoking within the past year.

### 48 49 50 **Laboratory determinations**

51  
52 Venous blood sampling was performed between 08:00 and 09:00 hours after the individuals  
53  
54 fasted and abstained from smoking and the consumption of alcohol and caffeinated beverages  
55  
56 for the previous 12 hours. Fasting plasma glucose, serum, high-density lipoprotein (HDL)

1  
2  
3 cholesterol concentrations and triglyceride concentrations were measured using standard  
4 enzymatic automated methods. Low-density lipoprotein cholesterol was estimated by the  
5 Friedewald equation when the direct parameter will be not available. Atherogenic index was  
6 estimated (total cholesterol / HDL cholesterol). Blood samples were collected in the Health  
7 Center and analyzed at the hospital of reference.  
8  
9

10  
11  
12  
13  
14 The researchers who performed the different tests were blinded to the clinical data of the  
15 subjects. All assessments were made within a period of 10 days.  
16  
17

### 18 **Data analysis**

19  
20 Continuous variables were expressed as the mean  $\pm$  standard deviation. Frequency  
21 distributions were used for categorical data. Comparisons between quantitative variables were  
22 performed using the student t-test, while the chi-squared test and Fisher's exact test were used  
23 for qualitative variables. Pearson's correlation coefficient was used to estimate the  
24 relationship of the adiposity measures with CAVI and baPWV.  
25  
26  
27  
28  
29

30  
31  
32 Four different multiple linear regression models were used to analyze the associations of each  
33 adiposity measure with CAVI, and another four models were used with baPWV. CAVI and  
34 baPWV were the dependent variables, and the adiposity measures as independent variables in  
35 each model. All models were adjusted for age (years), gender (0 = male and 1 = female),  
36 systolic blood pressure (SBP), smoking status (0 = No and 1 = Yes), atherogenic index, and  
37 HbA1c. The explanatory capacity of the model was measured by  $R^2$ , and the proportion  
38 attributed to each variable was estimated by the change in  $R^2$ . The analysis was also  
39 performed by age groups, diagnosis of diabetes, hypertension, and obesity.  
40  
41  
42  
43  
44  
45  
46  
47  
48

49  
50 ANCOVA models were used to test the differences in the mean values of CAVI and baPWV  
51 with the quartiles of the four measures of adiposity after adjusting for the confounding  
52 variables used in the regression analysis. Pairwise post hoc comparisons were examined using  
53 the Bonferroni test. Data were analyzed using SPSS Statistics for Windows version 23.0  
54  
55  
56  
57  
58  
59  
60

1  
2  
3 (IBM Corp, Armonk, NY). Values of  $p < 0.05$  were considered statistically significant.  
4  
5 Continuous variables were expressed as the mean  $\pm$  standard deviation. Frequency  
6  
7 distributions were used for categorical data. Comparisons between quantitative variables were  
8  
9 performed using the student t-test, while the chi-squared test and Fisher's exact test were used  
10  
11 for qualitative variables. Pearson's correlation coefficient was used to estimate the  
12  
13 relationship of the adiposity measures with CAVI and baPWV.  
14

15  
16 Four different multiple linear regression models were used to analyze the associations of each  
17  
18 adiposity measure with CAVI, and another four models were used with baPWV. CAVI and  
19  
20 baPWV were the dependent variables, and the adiposity measures as independent variables in  
21  
22 each model. All models were adjusted for age (years), gender (0 = male and 1 = female),  
23  
24 systolic blood pressure (SBP), smoking status (0 = No and 1 = Yes), atherogenic index, and  
25  
26 HbA1c. The explanatory capacity of the model was measured by  $R^2$ , and the proportion  
27  
28 attributed to each variable was estimated by the change in  $R^2$ . The analysis was also  
29  
30 performed by age groups, diagnosis of diabetes, hypertension, and obesity.  
31  
32

33  
34 ANCOVA models were used to test the differences in the mean values of CAVI and baPWV  
35  
36 with the quartiles of the four measures of adiposity after adjusting for the confounding  
37  
38 variables used in the regression analysis. Pairwise post hoc comparisons were examined using  
39  
40 the Bonferroni test. Data were analyzed using SPSS Statistics for Windows version 23.0  
41  
42 (IBM Corp, Armonk, NY). Values of  $p < 0.05$  were considered statistically significant.  
43  
44

#### 45 **Ethics statement**

46  
47 All participants were informed of the objectives and procedures of the study and signed the  
48  
49 informed consent form to participate. The study was approved by the Clinical Research Ethics  
50  
51 Committee of the Primary Care Research Institute Jordi Gol, the Health Care Area of  
52  
53 Salamanca and Palma of Mallorca. The study was conducted following the recommendations  
54  
55 of the Declaration of Helsinki<sup>(28)</sup>. The confidentiality of information provided by participants  
56  
57  
58  
59  
60

1  
2  
3 was ensured, complying with the rules established by Spanish Organic Law 15/1999, of 13  
4  
5 December on the Protection of Personal Data.  
6

## 7 8 **RESULTS**

9  
10 The anthropometric measures, clinical characteristics, and vascular function measures of the  
11 subjects are presented in Table 1. The mean age of the patients was  $61.4 \pm 7.7$  years, and  
12  
13 61.9% were male. Male subjects had a higher percentage of smokers (31.5 vs. 22.7) and  
14  
15 hypertension (80.1 vs. 75.4). In contrast, females had a higher prevalence of obesity (40.4 vs.  
16  
17 33.4), dyslipidemia (73.1 vs. 63.6), and diabetes (36.5 vs. 31.8). The mean value of CAVI was  
18  
19  $8.8 \pm 1.2$  (8.9 in males and 8.6 in females) and the mean baPWV was  $14.9 \pm 2.5$  (14.8 in males  
20  
21 and 15.0 in females). All of the analyzed adiposity measures except for waist circumference  
22  
23 presented higher values in women.  
24  
25

26  
27 Pearson's correlation coefficients between the adiposity measures and the vascular function  
28  
29 parameters are shown in table 2. All adiposity measures were negatively correlated with  
30  
31 CAVI, and this correlation increases after adjusting for age, sex, and SBP.  
32  
33

34 Fig. 2 shows the estimated marginal means of CAVI (A) and baPWV (B) by quartiles of the  
35  
36 different adiposity measures. After adjustment for the variables used in the multiple linear  
37  
38 regression analysis, the mean CAVI values decrease as the quartiles of the four adiposity  
39  
40 measurements increased.  
41  
42

43 In the multiple linear regression analysis, CAVI and baPWV show negative associations with  
44  
45 all adiposity measures ( $p < 0.01$  in all) after adjustment for age, gender, systolic blood  
46  
47 pressure, smoking, atherogenic index, and HbA1c (Table 3). The proportions of CAVI  
48  
49 variability explained in the respective multiple linear regression analyses by the adiposity  
50  
51 measures were 7.5% for BMI, 7.2% for CUN-BAE, 4.3% for WHtR, and 4.1% for BRI. In the  
52  
53 case of baPWV, the variance explained by the measures of adiposity was 0.8% BMI, 0.7% for  
54  
55 CUN-BAE, and 0.1% for WHtR and BRI. (Table 3).  
56  
57  
58  
59  
60

1  
2  
3 In subgroup analysis, the proportion of CAVI variability explained by adiposity measures  
4 was higher among diabetics, the obese, non-hypertensive subjects, and subjects 62 years or  
5 younger (Table 1S) (supplementary material).  
6  
7  
8

## 9 **DISCUSSION**

10  
11 The results of this study show that adiposity measures have a negative association with  
12 arterial stiffness, especially CAVI. BMI and CUN-BAE have greater explanatory power of  
13 the variability of CAVI and baPWV than the WHtR and the BRI, and the explanatory  
14 capacity was higher in the case of CAVI. We found a negative association of different  
15 adiposity measures with CAVI and baPWV after adjustment for other cardiovascular risk  
16 factors.  
17  
18  
19  
20  
21  
22  
23

24  
25 This negative association with CAVI has already been described in previous studies. BMI has  
26 shown a negative association in work performed on children <sup>(39)</sup>, as well as in hypertensive  
27 and type 2 diabetes patients in Ghana <sup>(40)</sup>. Similarly, waist circumference has shown a  
28 negative relation in subjects with metabolic syndrome <sup>(41; 42)</sup>.  
29  
30  
31  
32

33  
34 However, other authors have described a positive association of different adiposity measures  
35 with the  $\beta$ -stiffness parameter, but after adjustment for age and other possible confounding  
36 factors, the association remained for only men with type 2 diabetes mellitus <sup>(43)</sup>. On the other  
37 hand, other studies have also found no association between BMI and CAVI <sup>(44)</sup>.  
38  
39  
40  
41

42  
43 Studies analyzing the association of adiposity measures with baPWV have been performed in  
44 mainly Eastern populations and have focused on assessing the association of BMI and waist  
45 circumference as measures of adiposity. The results have also not been concordant, with some  
46 finding a negative association with BMI. Studies analyzing the association of adiposity  
47 measures with baPWV have been performed in mainly Eastern populations and have focused  
48 on assessing the association of BMI and waist circumference as measures of adiposity. The  
49 results have also not been concordant, with some finding a negative association with BMI <sup>(45)</sup>,  
50  
51  
52  
53  
54  
55  
56  
57  
58  
59  
60

1  
2  
3 and with waist circumference in men only or in women only <sup>(46), (47)</sup>. However, other studies  
4  
5 have found a positive correlation with BMI and waist circumference <sup>(48)</sup>. One study that  
6  
7 analyzed the association of different adiposity parameters with baPWV in middle-aged adults  
8  
9 found a positive association with waist circumference and visceral fat but not with body fat  
10  
11 percentage <sup>(49)</sup>.  
12

13  
14 The results are also not consistent in works that have used carotid-femoral pulse wave  
15  
16 velocity (cfPWV) as a measure of stiffness. Some studies have described a greater association  
17  
18 with measures of central or visceral adiposity in both the general population and in diabetics  
19  
20 (10; 13; 17; 18; 19; 21). However, Strasser et al. <sup>(49)</sup> found no association with body fat percentage,  
21  
22 and other studies also found no association between BMI and cfPWV <sup>(13; 14)</sup>. Rodrigues et al  
23  
24 <sup>(15)</sup>, reported that BMI was negatively associated with cfPWV ( $\beta = -0.103$ ) in a large  
25  
26 population sample.  
27  
28

29  
30 Arterial stiffness depends on the elasticity of the arterial wall and the diameter of the arterial  
31  
32 wall, and a positive correlation has been found between BMI and aortic diameter measured by  
33  
34 nuclear magnetic resonance <sup>(50)</sup>. This could be a factor that explains the negative association  
35  
36 between measures of adiposity and arterial stiffness. These discrepancies between studies may  
37  
38 be partially explained by different methods of arterial stiffness measurement and the  
39  
40 adjustment variables used. The reason may be that CAVI reflects central and peripheral  
41  
42 arterial stiffness and is less influenced by blood pressure values at the time of measurement  
43  
44 <sup>(36; 51; 52)</sup>. In contrast, arterial stiffness assessed with baPWV is a measure of peripheral arterial  
45  
46 stiffness <sup>(37)</sup>. Other possible reasons that may influence the observed differences are age, sex,  
47  
48 race, prevalent cardiovascular risk, and drugs used for treatment of the different risk factor <sup>(12;</sup>  
49  
50 <sup>45; 47; 48)</sup>.  
51  
52

53  
54 The proportion of baPWV variability explained by adiposity measurements in our study was  
55  
56 small (between 0.8% for BMI and 0.1% for WHtR and BRI). The results are also lower than  
57  
58  
59  
60

1  
2  
3 those published for the general population by Wohlfahrt et al. (5% for WHtR and 3% for  
4 BMI) <sup>(10)</sup> but similar to the results reported by Rodrigues et al. (BMI 0.7%) <sup>(15)</sup>. The  
5  
6 proportion of CAVI variability explained by adiposity measures was higher than 7% with  
7  
8 CUN-BAE and BMI and higher than 4% with WHtR and BRI. In the subgroup analysis, the  
9  
10 proportion of CAVI variability explained by adiposity measures was higher in diabetic, obese,  
11  
12 younger, and non-hypertensive subjects. Our results indicate the influence of adiposity  
13  
14 measurements on CAVI is greater than on baPWV. We have not found previous work that has  
15  
16 analyzed this aspect with CAVI. The novel results of this study may have important clinical  
17  
18 relevance since they show the associations of both general and abdominal obesity measures  
19  
20 with CAVI and baPWV in subjects with intermediate cardiovascular risk. In addition, the  
21  
22 results provide information that could be used in new prospective studies and could  
23  
24 potentially help to improve cardiovascular risk equations.  
25  
26  
27  
28

29  
30 The main limitation of our study is its cross-sectional design, which does not allow us to  
31  
32 establish causal relations or the direction of influence of adiposity measures in vascular  
33  
34 function. Another limitation that must be mentioned is that the population was ethnically  
35  
36 homogeneous (all subjects were Caucasians with intermediate cardiovascular risk). Therefore,  
37  
38 the extrapolation of our findings may be limited.  
39

#### 40 **Conclusion**

41  
42 In conclusion, the adiposity measures analyzed show a negative association with measures of  
43  
44 arterial stiffness. The explanatory capacity of the variability of arterial stiffness is greater with  
45  
46 BMI and CUN-BAE and when using CAVI as a measure of stiffness rather than baPWV.  
47  
48 These results suggest that measures of general adiposity and body fat percentage better  
49  
50 explain the variability of CAVI than measures of abdominal and visceral adiposity.  
51  
52  
53  
54  
55  
56  
57  
58  
59  
60

1  
2  
3 **Acknowledgments** We are grateful to all professionals participating in the MARK study.

4  
5 Lead author for this group: Rafel Ramos, Research Unit, Primary Health Care, Girona, Jordi  
6  
7 Gol Institute for Primary Care Research (IDIAP Jordi Gol), Catalonia, Spain, E-mail:  
8  
9 rramos.girona.ics@gencat.net. Coordinating Center: Rafel Ramos, Ruth Martí, Dídac  
10  
11 Parramon, Anna Ponjoan, Miquel Quesada, Maria Garcia-Gil, Martina Sidera and Lourdes  
12  
13 Camós, Research Unit, Primary Health Care, Jordi Gol Institute for Primary Care Research  
14  
15 (IDIAP Jordi Gol), C/Maluquer Salvador, 11, 17002-Girona, Catalonia, Spain. Fernando  
16  
17 Montesinos, Ignacio Montoya, Carlos López, Anna Agell, Núria Pagès of the Primary Care  
18  
19 Services, Girona, Catalan Institute of Health (ICS), Catalonia, Spain. Irina Gil, Anna Maria-  
20  
21 Castro of the Primary Care Services, Girona, Institut d'Assistència Sanitaria (IAS), Catalonia,  
22  
23 Spain. Fernando Rigo, Guillermo Frontera, Antònia Rotger, Natalia Feuerbach, Susana Pons,  
24  
25 Natividad Garcia, John Guillaumet, Micaela Llull and Mercedes Gutierrez of the Health  
26  
27 Center Primary Care San Agustín, Ibsalut Balears, Spain. Cristina Agudo-Conde, Leticia  
28  
29 Gómez-Sanchez, Carmen Castaño-Sanchez, Carmela Rodriguez-Martín, Benigna Sanchez-  
30  
31 Salgado, Angela de Cabo-Laso, Emiliano Rodriguez-Sanchez, Jose Angel Maderuelo-  
32  
33 Fernandez, Marta Gómez-Sánchez, Emilio Ramos-Delgado, Carmen Patino-Alonso, Jose I  
34  
35 Recio-Rodriguez, Manuel A Gomez-Marcos and Luis Garcia-Ortiz, Primary Care Research  
36  
37 Unit of The Alamedilla, Salamanca, Spain, Castilla and León Health Service–SACYL.

38  
39 **Contributors** LG-S designed the study, wrote the protocol, participated in fundraising,  
40  
41 interpreted the results, prepared the manuscript draft, performed all analytical testing,  
42  
43 interpreted the results and reviewed the manuscript and corrected the final version of the  
44  
45 manuscript. JIR-R, RM, FR and CA-C participated in the study design, data collection and  
46  
47 manuscript review. ER-S and JAM-F participated in the study design, interpretation of results  
48  
49 and manuscript review. MCP-A participated in the analysis of results and final review of the  
50  
51 manuscript. LG-O, RR AND MAG-M participated in the protocol design, fundraising,  
52  
53  
54  
55  
56  
57  
58  
59  
60



1  
2  
3 analysis of results and final review of the manuscript. All authors reviewed and approved the  
4  
5 final version of the manuscript.  
6

7 **Funding** This work was supported by grants from the Spanish Ministry of Science and  
8  
9 Innovation (MICINN), the Carlos III Health Institute/European Regional Development Fund  
10 (ERDF) (MICINN, ISCIII/FEDER) (Red RedIAPP RD06/0018, Research Groups:  
11 RD16/0007/0003, RD16/0007/0004, RD16/0007/0008), the Health Research Fund  
12 (PI10/01088, PI10/02077, PI10/02043, PI13/01930), and the Regional Health Management of  
13 Castile and León (GRS 635/A/11; GRS 906/B/14).  
14  
15  
16  
17  
18  
19

20 **Competing interests** None declared.  
21

22 **Ethics approval** The Clinical Research Ethics Committee of the Primary Care Research  
23  
24 Institute Jordi Gol, the Health Care Area of Salamanca and Palma of Mallorca.  
25  
26

27 **Provenance and peer review** Not commissioned; externally peer reviewed.  
28

29 **Data sharing statement** No additional data are available.  
30

31 **Informed consent** Obtained.  
32  
33

34 **Open Access** This is an Open Access article distributed in accordance with the Creative  
35  
36 Commons Attribution Non Commercial (CC BY-NC 4.0) license, which permits others to  
37  
38 distribute, remix, adapt, build upon this work noncommercially, and license their derivative  
39  
40 works on different terms, provided the original work is properly cited and the use is non-  
41  
42 commercial. See: <http://creativecommons.org/licenses/by-nc/4.0/>  
43  
44  
45  
46  
47  
48  
49  
50  
51  
52  
53  
54  
55  
56  
57  
58  
59  
60

1  
2  
3 **Figure legends**  
4

5 **Figure 1:** Flow chart of this MARK substudy.  
6

7 Abbreviations: N, number; CAVI, cardio-ankle vascular index; baPWV, brachial-ankle pulse  
8 wave velocity; ABI, ankle-brachial index; WC, waist circumference.  
9  
10  
11  
12  
13  
14  
15  
16  
17  
18  
19  
20  
21  
22  
23  
24  
25  
26  
27  
28  
29  
30  
31  
32  
33  
34  
35  
36  
37  
38  
39  
40  
41  
42  
43  
44  
45  
46  
47  
48  
49  
50  
51  
52  
53  
54  
55  
56  
57  
58  
59  
60

For peer review only

1  
2  
3 **Figure 2:** Data are given as medias estimadas de CAVI y baPWV por cuartiles de BMI,  
4  
5 WHtR, CUN-BAE and BRI.

6  
7 Adjusted for age (years), gender (0=male and 1=female), systolic blood pressure smoking  
8  
9 (0=No and 1=Yes), atherogenic index, and HbA1c.

10  
11 baPWV and CAVI levels were compared using an ANOVA test, followed by post hoc  
12  
13 analysis using a Bonferroni test.

14  
15  
16 CAVI:  $p < 0.05$  entre cuartiles, excepto entre el cuartil 2 y el cuartil 3 con el BRI y la WHtR  
17  
18 (p= 0.999).

19  
20  
21 baPWV:  $p < 0.05$  entre cuartiles con BMI entre los cuartiles 1 - 4, 2 - 4 y 3-4 and con CUN-  
22  
23 BAE entre los cuartiles 1 - 3, 1 - 4 and 2 -4.  $P > 0.05$  entre cuartiles de BRI y de WHtR.

24  
25 Abbreviations: CAVI, cardio-ankle vascular index. ba-PWV, brachial-ankle pulse wave  
26  
27 velocity. BMI, body mass index. WHtR, waist-to-height ratio. CUN-BAE, University clinic  
28  
29 of Navarra - body adiposity estimator. BRI, body roundness index.  
30  
31  
32  
33  
34  
35  
36  
37  
38  
39  
40  
41  
42  
43  
44  
45  
46  
47  
48  
49  
50  
51  
52  
53  
54  
55  
56  
57  
58  
59  
60

## References

1. Adams KF, Schatzkin A, Harris TB *et al.* (2006) Overweight, obesity, and mortality in a large prospective cohort of persons 50 to 71 years old. *N Engl J Med* **355**, 763-778.
2. Poirier P, Giles TD, Bray GA *et al.* (2006) Obesity and cardiovascular disease: pathophysiology, evaluation, and effect of weight loss: an update of the 1997 American Heart Association Scientific Statement on Obesity and Heart Disease from the Obesity Committee of the Council on Nutrition, Physical Activity, and Metabolism. *Circulation* **113**, 898-918.
3. Turin TC, Kita Y, Rumana N *et al.* (2010) Brachial-ankle pulse wave velocity predicts all-cause mortality in the general population: findings from the Takashima study, Japan. *Hypertens Res* **33**, 922-925.
4. Maeda Y, Inoguchi T, Etoh E *et al.* (2014) Brachial-ankle pulse wave velocity predicts all-cause mortality and cardiovascular events in patients with diabetes: the Kyushu Prevention Study of Atherosclerosis. *Diabetes Care* **37**, 2383-2390.
5. Ikura K, Hanai K, Oka S *et al.* (2016) Brachial-ankle pulse wave velocity, but not ankle-brachial index, predicts all-cause mortality in patients with diabetes after lower extremity amputation. *J Diabetes Investig*.
6. Izuhara M, Shioji K, Kadota S *et al.* (2008) Relationship of cardio-ankle vascular index (CAVI) to carotid and coronary arteriosclerosis. *Circ J* **72**, 1762-1767.
7. Okura T, Watanabe S, Kurata M *et al.* (2007) Relationship between cardio-ankle vascular index (CAVI) and carotid atherosclerosis in patients with essential hypertension. *Hypertens Res* **30**, 335-340.
8. Nakamura K, Tomaru T, Yamamura S *et al.* (2008) Cardio-ankle vascular index is a candidate predictor of coronary atherosclerosis. *Circ J* **72**, 598-604.
9. Satoh-Asahara N, Kotani K, Yamakage H *et al.* (2015) Cardio-ankle vascular index predicts for the incidence of cardiovascular events in obese patients: a multicenter prospective cohort study (Japan Obesity and Metabolic Syndrome Study: JOMS). *Atherosclerosis* **242**, 461-468.
10. Wohlfahrt P, Somers VK, Cifkova R *et al.* (2014) Relationship between measures of central and general adiposity with aortic stiffness in the general population. *Atherosclerosis* **235**, 625-631.
11. Wohlfahrt P, Krajcoviechova A, Seidlerova J *et al.* (2013) Lower-extremity arterial stiffness vs. aortic stiffness in the general population. *Hypertens Res* **36**, 718-724.
12. Moh MC, Sum CF, Lam BC *et al.* (2015) Evaluation of body adiposity index as a predictor of aortic stiffness in multi-ethnic Asian population with type 2 diabetes. *Diab Vasc Dis Res* **12**, 111-118.
13. Teoh WL, Price JF, Williamson RM *et al.* (2013) Metabolic parameters associated with arterial stiffness in older adults with Type 2 diabetes: the Edinburgh Type 2 diabetes study. *J Hypertens* **31**, 1010-1017.
14. Hansen TW, Jeppesen J, Rasmussen S *et al.* (2004) Relation between insulin and aortic stiffness: a population-based study. *J Hum Hypertens* **18**, 1-7.
15. Rodrigues SL, Baldo MP, Lani L *et al.* (2012) Body mass index is not independently associated with increased aortic stiffness in a Brazilian population. *Am J Hypertens* **25**, 1064-1069.
16. Huisman HW, Schutte R, Venter HL *et al.* (2015) Low BMI is inversely associated with arterial stiffness in Africans. *Br J Nutr* **113**, 1621-1627.
17. Canepa M, AlGhatrif M, Pestelli G *et al.* (2014) Impact of central obesity on the estimation of carotid-femoral pulse wave velocity. *Am J Hypertens* **27**, 1209-1217.

18. Scuteri A, Orru M, Morrell CH *et al.* (2012) Associations of large artery structure and function with adiposity: effects of age, gender, and hypertension. The SardiNIA Study. *Atherosclerosis* **221**, 189-197.
19. Johansen NB, Vistisen D, Brunner EJ *et al.* (2012) Determinants of aortic stiffness: 16-year follow-up of the Whitehall II study. *PLoS One* **7**, e37165.
20. Wildman RP, Mackey RH, Bostom A *et al.* (2003) Measures of obesity are associated with vascular stiffness in young and older adults. *Hypertension* **42**, 468-473.
21. Recio-Rodriguez JI, Gomez-Marcos MA, Patino-Alonso MC *et al.* (2012) Abdominal obesity vs general obesity for identifying arterial stiffness, subclinical atherosclerosis and wave reflection in healthy, diabetics and hypertensive. *BMC Cardiovasc Disord* **12**, 3.
22. Brunner EJ, Shipley MJ, Ahmadi-Abhari S *et al.* (2015) Adiposity, obesity, and arterial aging: longitudinal study of aortic stiffness in the Whitehall II cohort. *Hypertension* **66**, 294-300.
23. Marrugat J, Vila J, Baena-Diez JM *et al.* (2011) [Relative validity of the 10-year cardiovascular risk estimate in a population cohort of the REGICOR study]. *Rev Esp Cardiol* **64**, 385-394.
24. Marti R, Parramon D, Garcia-Ortiz L *et al.* (2011) Improving interMediate risk management. MARK study. *BMC Cardiovasc Disord* **11**, 61.
25. Marrugat J, D'Agostino R, Sullivan L *et al.* (2003) An adaptation of the Framingham coronary heart disease risk function to European Mediterranean areas. *J Epidemiol Community Health* **57**, 634-638.
26. Conroy RM, Pyorala K, Fitzgerald AP *et al.* (2003) Estimation of ten-year risk of fatal cardiovascular disease in Europe: the SCORE project. *Eur Heart J* **24**, 987-1003.
27. Mancia G, Fagard R, Narkiewicz K *et al.* (2013) 2013 ESH/ESC Guidelines for the management of arterial hypertension: the Task Force for the management of arterial hypertension of the European Society of Hypertension (ESH) and of the European Society of Cardiology (ESC). *J Hypertens* **31**, 1281-1357.
28. (2013) World Medical Association Declaration of Helsinki: ethical principles for medical research involving human subjects. *JAMA* **310**, 2191-2194.
29. Salas-Salvado J, Rubio MA, Barbany M *et al.* (2007) [SEEDO 2007 Consensus for the evaluation of overweight and obesity and the establishment of therapeutic intervention criteria]. *Med Clin (Barc)* **128**, 184-196. .
30. Browning LM, Hsieh SD, Ashwell M (2010) A systematic review of waist-to-height ratio as a screening tool for the prediction of cardiovascular disease and diabetes: 0.5 could be a suitable global boundary value. *Nutr Res Rev* **23**, 247-269.
31. Oliveros E, Somers VK, Sochor O *et al.* (2014) The concept of normal weight obesity. *Prog Cardiovasc Dis* **56**, 426-433.
32. Gomez-Ambrosi J, Silva C, Catalan V *et al.* (2012) Clinical usefulness of a new equation for estimating body fat. *Diabetes Care* **35**, 383-388.
33. Thomas DM, Bredlau C, Bosy-Westphal A *et al.* (2013) Relationships between body roundness with body fat and visceral adipose tissue emerging from a new geometrical model. *Obesity (Silver Spring)* **21**, 2264-2271.
34. Satoh N, Shimatsu A, Kato Y *et al.* (2008) Evaluation of the cardio-ankle vascular index, a new indicator of arterial stiffness independent of blood pressure, in obesity and metabolic syndrome. *Hypertens Res* **31**, 1921-1930.
35. Shirai K, Utino J, Otsuka K *et al.* (2006) A novel blood pressure-independent arterial wall stiffness parameter; cardio-ankle vascular index (CAVI). *J Atheroscler Thromb* **13**, 101-107.
36. Shirai K, Hiruta N, Song M *et al.* (2011) Cardio-ankle vascular index (CAVI) as a novel indicator of arterial stiffness: theory, evidence and perspectives. *J Atheroscler Thromb* **18**, 924-938.

- 1  
2  
3 37. Yamashina A, Tomiyama H, Takeda K *et al.* (2002) Validity, reproducibility, and clinical  
4 significance of noninvasive brachial-ankle pulse wave velocity measurement. *Hypertens Res*  
5 **25**, 359-364.
- 6 38. O'Brien E, Asmar R, Beilin L *et al.* (2005) Practice guidelines of the European Society of  
7 Hypertension for clinic, ambulatory and self blood pressure measurement. *J Hypertens* **23**,  
8 697-701.
- 9 39. Philip R, Alpert BS, Schwingshackl A *et al.* (2015) Inverse Relationship between Cardio-  
10 Ankle Vascular Index and Body Mass Index in Healthy Children. *J Pediatr* **167**, 361-365  
11 e361.
- 12 40. Yeboah K, Antwi DA, Gyan B *et al.* (2016) Arterial stiffness in hypertensive and type 2  
13 diabetes patients in Ghana: comparison of the cardio-ankle vascular index and central aortic  
14 techniques. *BMC Endocr Disord* **16**, 53.
- 15 41. Al-Daghri NM, Al-Attas OS, Wani K *et al.* (2015) Sensitivity of various adiposity indices  
16 in identifying cardiometabolic diseases in Arab adults. *Cardiovasc Diabetol* **14**, 101.
- 17 42. Gomez-Sanchez L, Garcia-Ortiz L, Patino-Alonso MC *et al.* (2016) Association of  
18 metabolic syndrome and its components with arterial stiffness in Caucasian subjects of the  
19 MARK study: a cross-sectional trial. *Cardiovasc Diabetol* **15**, 148.
- 20 43. Morigami H, Morioka T, Yamazaki Y *et al.* (2016) Visceral Adiposity is Preferentially  
21 Associated with Vascular Stiffness Rather than Thickness in Men with Type 2 Diabetes. *J*  
22 *Atheroscler Thromb* **23**, 1067-1079.
- 23 44. Kawada T, Andou T, Fukumitsu M (2014) Relationship between cardio-ankle vascular  
24 index and components of metabolic syndrome in combination with sex and age. *Diabetes*  
25 *Metab Syndr* **8**, 242-244.
- 26 45. Tomiyama H, Yamashina A, Arai T *et al.* (2003) Influences of age and gender on results  
27 of noninvasive brachial-ankle pulse wave velocity measurement--a survey of 12517 subjects.  
28 *Atherosclerosis* **166**, 303-309.
- 29 46. Zhou F, Zhang H, Yao W *et al.* (2014) Relationship between brachial-ankle pulse wave  
30 velocity and metabolic syndrome components in a Chinese population. *J Biomed Res* **28**, 262-  
31 268.
- 32 47. Kim HL, Lee JM, Seo JB *et al.* (2015) The effects of metabolic syndrome and its  
33 components on arterial stiffness in relation to gender. *J Cardiol* **65**, 243-249.
- 34 48. Weng C, Yuan H, Yang K *et al.* (2013) Gender-specific association between the  
35 metabolic syndrome and arterial stiffness in 8,300 subjects. *Am J Med Sci* **346**, 289-294.
- 36 49. Strasser B, Arvandi M, Pasha EP *et al.* (2015) Abdominal obesity is associated with  
37 arterial stiffness in middle-aged adults. *Nutr Metab Cardiovasc Dis* **25**, 495-502.
- 38 50. Danias PG, Tritos NA, Stuber M *et al.* (2003) Comparison of aortic elasticity determined  
39 by cardiovascular magnetic resonance imaging in obese versus lean adults. *Am J Cardiol* **91**,  
40 195-199.
- 41 51. Takaki A, Ogawa H, Wakeyama T *et al.* (2008) Cardio-ankle vascular index is superior to  
42 brachial-ankle pulse wave velocity as an index of arterial stiffness. *Hypertens Res* **31**, 1347-  
43 1355.
- 44 52. Shirai K (2011) Analysis of vascular function using the cardio-ankle vascular index  
45 (CAVI). *Hypertens Res* **34**, 684-685.
- 46  
47  
48  
49  
50  
51  
52  
53  
54  
55  
56  
57  
58  
59  
60

**Table 1** General characteristics of all the sample and by gender.

| Variables                    | Global<br>(n=2354) | Males<br>(n=1456) | Females<br>(n=898) | p Value |
|------------------------------|--------------------|-------------------|--------------------|---------|
| Age (years)                  | 61.4±7.7           | 61.1±8.1          | 61.8±7.0           | 0.030   |
| Smoking n (%)                | 658 (28.0)         | 456 (31.5)        | 202 (22.7)         | <0.001  |
| Alcohol (gr/week)            | 72.2±117.5         | 102.2±133.3       | 23.6±59.9          | <0.001  |
| Height (cm)                  | 165±9              | 170±7             | 156±6              | <0.001  |
| Weight (kg)                  | 79.4±14.6          | 83.9±13.4         | 72.2±13.3          | <0.001  |
| BMI (kg/m <sup>2</sup> )     | 29.2±4.4           | 29.1±3.9          | 29.5±5.1           | 0.035   |
| BMI ≥ 30 n (%)               | 847 (36.0)         | 485 (33.4)        | 362 (40.4)         | 0.001   |
| Waist circumference (cm)     | 100.9±11.6         | 102.9±10.5        | 97.6±12.5          | <0.001  |
| WHtR                         | 0.61±0.07          | 0.61±0.06         | 0.62±0.08          | <0.001  |
| CUN-BAE                      | 35.7±1.7           | 31.1±4.5          | 43.1±5.1           | <0.001  |
| BRI                          | 5.8±1.7            | 5.7±1.5           | 6.1±2.1            | <0.001  |
| SBP (mmHg)                   | 137.1±17.4         | 138.9±17.1        | 134.2±17.5         | <0.001  |
| DBP (mmHg)                   | 84.4±10.2          | 85.5±10.4         | 82.7±9.7           | <0.001  |
| Heart rate (beats minutes)   | 74.2±10.2          | 73.3±12.7         | 75.8±11.6          | <0.001  |
| Hypertension n (%)           | 1712 (72.7)        | 1122 (80.1)       | 590 (75.4)         | <0.001  |
| Antihypertensive drugs n (%) | 1199 (50.9)        | 729 (50.2)        | 470 (52.6)         | 0.289   |
| Total Cholesterol (mg/dl)    | 225.8±40.9         | 220.8±39.1        | 233.9±42.5         | <0.001  |
| LDL Cholesterol (mg/dl)      | 140.4±34.9         | 138.9±34.2        | 142.8±35.8         | 0.011   |
| HDL Cholesterol (mg/dl)      | 49.8±12.9          | 47.9±11.9         | 52.9±13.8          | <0.001  |
| Triglycerides (mg/dl)        | 145.5±96.6         | 150.3±106.3       | 137.7±77.9         | 0.001   |
| Atherogenic index            | 4.8±1.3            | 4.8±1.3           | 4.7±1.3            | 0.002   |
| Dyslipidemia n (%)           | 1585 (67.3)        | 927 (63.6)        | 658 (73.1)         | <0.001  |
| Lipid lowering drugs n (%)   | 671 (28.5)         | 392 (26.8)        | 279 (31.0)         | 0.034   |
| FPG (mg/dl)                  | 107.2±34.8         | 106.9±33.9        | 107.6±36.1         | 0.659   |
| HbA1c                        | 4.8±1.3            | 5.9±1.4           | 6.1±1.4            | 0.001   |
| Diabetes n (%)               | 791 (33.6)         | 463 (31.8)        | 328 (36.5)         | 0.020   |
| Antidiabetic drugs n (%)     | 474 (20.1)         | 269 (18.5)        | 205 (22.9)         | 0.011   |
| CAVI                         | 8.8±1.2            | 8.9±1.2           | 8.6±1.1            | <0.001  |
| baPWV (m/s)                  | 14.9±2.5           | 14.8±2.5          | 15.0±2.6           | 0.107   |

Values are means and (standard deviations) for continuous data and number and (proportions) for categorical data.

Abbreviations: BMI, body mass index. WHtR, waist-to-height ratio. CUN-BAE, University clinic of Navarra - body adiposity estimator. BRI, body roundness index. SBP, systolic blood pressure. DBP, diastolic blood pressure. LDL, low density lipoprotein. HDL, high density lipoprotein. FPG, fasting plasma glucose. HbA1c, glycosylated hemoglobin. CAVI, cardio ankle vascular index. baPWV, braquial-ankle pulse wave velocity.

p value differences between male and females

**Table 2: Bivariate correlations of adiposity measures with CAVI and baPWV.**

|                | CAVI       |                       | baPWV      |                       |
|----------------|------------|-----------------------|------------|-----------------------|
|                | Unadjusted | Adjusted <sup>a</sup> | Unadjusted | Adjusted <sup>a</sup> |
| <b>BMI</b>     | -0.264**   | -0.303**              | -0.035     | -0.068**              |
| <b>WHtR</b>    | -0.119**   | -0.222**              | 0.090**    | 0.001                 |
| <b>CUN-BAE</b> | -0.187**   | -0.297**              | 0.054*     | -0.063**              |
| <b>BRI</b>     | -0.125**   | -0.218**              | 0.078**    | 0.005                 |

Abbreviations: CAVI, cardio-ankle vascular index. baPWV, brachial-ankle pulse wave velocity. BMI, body mass index. WHtR, waist-to-height ratio. CUN-BAE, University clinic of Navarra - body adiposity estimator. BRI, body roundness index.

<sup>a</sup> Adjusted for age, sex and systolic blood pressure.

p-values by Pearson correlation. \* p<0.05, \*\* p< 0.01.

For peer review only



**Table 3: Multiple regression analysis: association between adiposity measures with CAVI and baPWV.**

|                | R <sup>2</sup> | β(95%CI)                  | Partial R <sup>2</sup> | p value |
|----------------|----------------|---------------------------|------------------------|---------|
| <b>CAVI</b>    |                |                           |                        |         |
| <b>BMI</b>     | 0.410          | -0.075 (-0.084 to -0.066) | 0.075                  | <0.001  |
| <b>WHtR</b>    | 0.378          | -3.580 (-4.137 to -3.022) | 0.043                  | <0.001  |
| <b>CUN-BAE</b> | 0.407          | -0.067 (-0.075 to -0.060) | 0.072                  | <0.001  |
| <b>BRI</b>     | 0.376          | -0.142 (-0.165 to -0.119) | 0.041                  | <0.001  |
| <b>baPWV</b>   |                |                           |                        |         |
| <b>BMI</b>     | 0.398          | -0.055 (-0.073 to -0.036) | 0.008                  | <0.001  |
| <b>WHtR</b>    | 0.391          | -1.402 (-2.594 to -0.211) | 0.001                  | 0.021   |
| <b>CUN-BAE</b> | 0.397          | -0.056 (-0.073 to -0.039) | 0.007                  | <0.001  |
| <b>BRI</b>     | 0.391          | -0.060 (-0.109 to -0.012) | 0.001                  | 0.014   |

Four different multiple linear regression models were used to analyze the associations of adiposity measures with CAVI and baPWV.

Adjusted for age (years), gender (0=male and 1=female), systolic blood pressure smoking (0=No and 1=Yes), atherogenic index, and HbA1c.

Abbreviations: CAVI, cardio-ankle vascular index. baPWV, brachial-ankle pulse wave velocity. BMI, body mass index. WHtR, waist-to-height ratio. CUN-BAE, University clinic of Navarra - body adiposity estimator. BRI, body roundness index.

Table 4: Association between adiposity measures with CAVI in different groups.

|                  | R <sup>2</sup> | β(95%CI)                   | Partial R <sup>2</sup> | p value |
|------------------|----------------|----------------------------|------------------------|---------|
| CAVI             |                |                            |                        |         |
| Hypertensive     |                |                            |                        |         |
| <b>BMI</b>       | 0.408          | -0.075 (-0.086 to -0.064)  | 0.068                  | <0.001  |
| <b>WHtR</b>      | 0.383          | -3.816 (-4.512 to -3.120)  | 0.043                  | <0.001  |
| <b>CUN-BAE</b>   | 0.406          | -0.068 (-0.078 to -0.058)  | 0.066                  | <0.001  |
| <b>BRI</b>       | 0.383          | -0.157 (-0.186 to -0.129)  | 0.043                  | <0.001  |
| Non hypertensive |                |                            |                        |         |
| <b>BMI</b>       | 0.376          | -0.073 (-0.088 to -0.058)  | 0.095                  | <0.001  |
| <b>WHtR</b>      | 0.326          | -2.999 (-3.915 to -2.083)  | 0.056                  | <0.001  |
| <b>CUN-BAE</b>   | 0.407          | -0.068 (-0.082 to -0.054)  | 0.091                  | <0.001  |
| <b>BRI</b>       | 0.321          | -0.110 (-0.147 to -0.074)  | 0.050                  | <0.001  |
| Diabetics        |                |                            |                        |         |
| <b>BMI</b>       | 0.434          | -0.088 (-0.102 to -0.076)  | 0.102                  | <0.001  |
| <b>WHtR</b>      | 0.395          | -4.478 (-5.411 to -3.545)  | 0.039                  | <0.001  |
| <b>CUN-BAE</b>   | 0.436          | -0.084 (-0.097 to -0.070)  | 0.104                  | <0.001  |
| <b>BRI</b>       | 0.387          | -0.154 (-0.200 to -0.127)  | 0.047                  | <0.001  |
| Non diabetics    |                |                            |                        |         |
| <b>BMI</b>       | 0.392          | -0.067 (-0.078 to -0.056)  | 0.054                  | <0.001  |
| <b>WHtR</b>      | 0.365          | -3.057 (-3.764 to -2.350)  | 0.027                  | <0.001  |
| <b>CUN-BAE</b>   | 0.393          | -0.060 (-0.070 to -0.050)  | 0.055                  | <0.001  |
| <b>BRI</b>       | 0.365          | -0.128 (-0.158 to -0.099)  | 0.027                  | <0.001  |
| Obese            |                |                            |                        |         |
| <b>BMI</b>       | 0.414          | -0.090 (-0.109 to -0.071)  | 0.057                  | <0.001  |
| <b>WHtR</b>      | 0.376          | -2.985 (-4.512 to -3.120)  | 0.036                  | <0.001  |
| <b>CUN-BAE</b>   | 0.413          | -0.098 (-0.120 to -0.077)  | 0.058                  | <0.001  |
| <b>BRI</b>       | 0.376          | -0.112 (-4.125 to -1.846)  | 0.036                  | <0.001  |
| Non obese        |                |                            |                        |         |
| <b>BMI</b>       | 0.371          | -0.063 (-0.083 to -0.043)  | 0.016                  | <0.001  |
| <b>WHtR</b>      | 0.358          | -1.397 (-2.371 to -0.424)  | 0.002                  | 0.005   |
| <b>CUN-BAE</b>   | 0.370          | -0.050 (-0.067 to -0.034)  | 0.015                  | <0.001  |
| <b>BRI</b>       | 0.357          | 0.048 (-0.089 to -0.007)   | 0.001                  | 0.021   |
| ≤ 62 years       |                |                            |                        |         |
| <b>BMI</b>       | 0.358          | -0.077 (-0.087 to -0.066)  | 0.107                  | <0.001  |
| <b>WHtR</b>      | 0.321          | -4.017 (-4.731 to -3.302)  | 0.070                  | <0.001  |
| <b>CUN-BAE</b>   | 0.352          | -0.067 (-0.077 to -0.058)  | 0.101                  | <0.001  |
| <b>BRI</b>       | 0.318          | -0.158 (-0.059 to -0.092)  | 0.067                  | <0.001  |
| > 62 years       |                |                            |                        |         |
| <b>BMI</b>       | 0.231          | -0.074 (-0.088 to -0.060)  | 0.074                  | <0.001  |
| <b>WHtR</b>      | 0.191          | -3.108 (-3.9980 to -2.235) | 0.034                  | <0.001  |
| <b>CUN-BAE</b>   | 0.230          | -0.071 (-0.085 to -0.058)  | 0.073                  | <0.001  |
| <b>BRI</b>       | 0.190          | 0.125 (-0.161 to -0.089)   | 0.033                  | <0.001  |

Multiple linear regression models were used to analyze the associations of adiposity measures with CAVI by groups.

Adjusted for age (years), gender (0=male and 1=female), Systolic blood pressure, smoking (0=No and 1=Yes), atherogenic index, and HbA1c.

Abbreviations: CAVI, cardio-ankle vascular index. BMI, body mass index. WHtR, waist-to-height ratio. CUN-BAE, University clinic of Navarra - body adiposity estimator. BRI, body roundness index.

1  
2  
3  
4  
5  
6  
7  
8  
9  
10  
11  
12  
13  
14  
15  
16  
17  
18  
19  
20  
21  
22  
23  
24  
25  
26  
27  
28  
29  
30  
31  
32  
33  
34  
35  
36  
37  
38  
39  
40  
41  
42  
43  
44  
45  
46  
47  
48  
49  
50  
51  
52  
53  
54  
55  
56  
57  
58  
59  
60

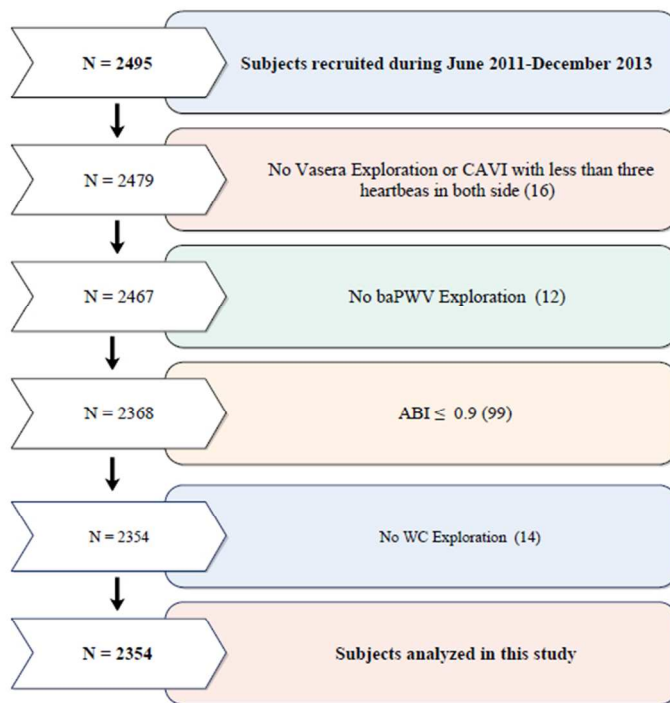

216x159mm (96 x 96 DPI)

Review only

1  
2  
3  
4  
5  
6  
7  
8  
9  
10  
11  
12  
13  
14  
15  
16  
17  
18  
19  
20  
21  
22  
23  
24  
25  
26  
27  
28  
29  
30  
31  
32  
33  
34  
35  
36  
37  
38  
39  
40  
41  
42  
43  
44  
45  
46  
47  
48  
49  
50  
51  
52  
53  
54  
55  
56  
57  
58  
59  
60

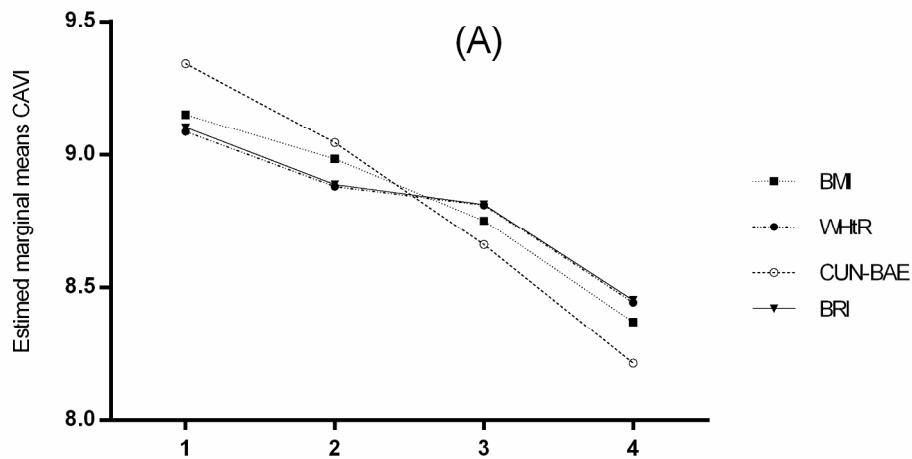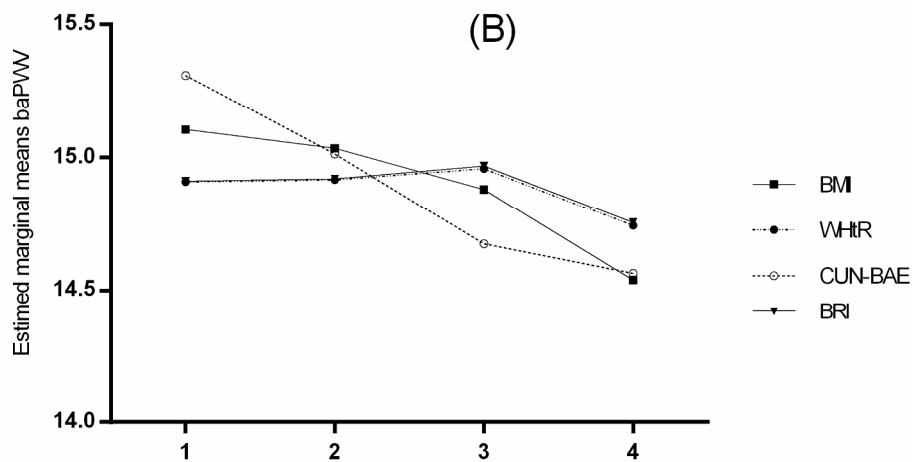

195x236mm (300 x 300 DPI)

## STROBE Statement—checklist of items that should be included in reports of observational studies

|                              | Item No | Recommendation                                                                                                                                                                                                                                                                                                                                                                                                                                                                                                                                                                                                                                                                                                                               |
|------------------------------|---------|----------------------------------------------------------------------------------------------------------------------------------------------------------------------------------------------------------------------------------------------------------------------------------------------------------------------------------------------------------------------------------------------------------------------------------------------------------------------------------------------------------------------------------------------------------------------------------------------------------------------------------------------------------------------------------------------------------------------------------------------|
| <b>Title and abstract</b>    | 1       | (a) Indicate the study's design with a commonly used term in the title or the abstract<br><b>Yes, Page 1</b><br>(b) Provide in the abstract an informative and balanced summary of what was done and what was found<br><b>Yes, Page 2</b>                                                                                                                                                                                                                                                                                                                                                                                                                                                                                                    |
| <b>Introduction</b>          |         |                                                                                                                                                                                                                                                                                                                                                                                                                                                                                                                                                                                                                                                                                                                                              |
| Background/rationale         | 2       | Explain the scientific background and rationale for the investigation being reported<br><b>Yes, Page 4</b>                                                                                                                                                                                                                                                                                                                                                                                                                                                                                                                                                                                                                                   |
| Objectives                   | 3       | State specific objectives, including any prespecified hypotheses<br><b>Yes, Page 4</b>                                                                                                                                                                                                                                                                                                                                                                                                                                                                                                                                                                                                                                                       |
| <b>Methods</b>               |         |                                                                                                                                                                                                                                                                                                                                                                                                                                                                                                                                                                                                                                                                                                                                              |
| Study design                 | 4       | Present key elements of study design early in the paper<br><b>Yes, Page 5</b>                                                                                                                                                                                                                                                                                                                                                                                                                                                                                                                                                                                                                                                                |
| Setting                      | 5       | Describe the setting, locations, and relevant dates, including periods of recruitment, exposure, follow-up, and data collection<br><b>Yes, Page 5</b>                                                                                                                                                                                                                                                                                                                                                                                                                                                                                                                                                                                        |
| Participants                 | 6       | (a) <i>Cohort study</i> —Give the eligibility criteria, and the sources and methods of selection of participants. Describe methods of follow-up<br><i>Case-control study</i> —Give the eligibility criteria, and the sources and methods of case ascertainment and control selection. Give the rationale for the choice of cases and controls<br><i>Cross-sectional study</i> —Give the eligibility criteria, and the sources and methods of selection of participants<br><b>Yes, Page 5</b><br>(b) <i>Cohort study</i> —For matched studies, give matching criteria and number of exposed and unexposed<br><i>Case-control study</i> —For matched studies, give matching criteria and the number of controls per case<br><b>Yes, Page 5</b> |
| Variables                    | 7       | Clearly define all outcomes, exposures, predictors, potential confounders, and effect modifiers. Give diagnostic criteria, if applicable<br><b>Yes, Page 6</b>                                                                                                                                                                                                                                                                                                                                                                                                                                                                                                                                                                               |
| Data sources/<br>measurement | 8*      | For each variable of interest, give sources of data and details of methods of assessment (measurement). Describe comparability of assessment methods if there is more than one group<br><b>Yes, Page 6-9</b>                                                                                                                                                                                                                                                                                                                                                                                                                                                                                                                                 |
| Bias                         | 9       | Describe any efforts to address potential sources of bias<br><b>Yes, Page 8-9</b>                                                                                                                                                                                                                                                                                                                                                                                                                                                                                                                                                                                                                                                            |
| Study size                   | 10      | Explain how the study size was arrived at<br><b>Yes, Page 5</b>                                                                                                                                                                                                                                                                                                                                                                                                                                                                                                                                                                                                                                                                              |
| Quantitative variables       | 11      | Explain how quantitative variables were handled in the analyses. If applicable, describe which groupings were chosen and why<br><b>Yes, Page 8-9</b>                                                                                                                                                                                                                                                                                                                                                                                                                                                                                                                                                                                         |

- 1  
2  
3  
4  
5  
6  
7  
8  
9  
10  
11  
12  
13  
14  
15  
16  
17  
18  
19  
20  
21  
22  
23  
24  
25  
26  
27  
28  
29  
30  
31  
32  
33  
34  
35  
36  
37  
38  
39  
40  
41  
42  
43  
44  
45  
46  
47  
48  
49  
50  
51  
52  
53  
54  
55  
56  
57  
58  
59  
60
- Statistical methods 12 (a) Describe all statistical methods, including those used to control for confounding **Yes, Page 8-9**
- 
- (b) Describe any methods used to examine subgroups and interactions **Yes, Page 8-9**
- 
- (c) Explain how missing data were addressed **Yes, Page 8-9**
- 
- (d) *Cohort study*—If applicable, explain how loss to follow-up was addressed  
*Case-control study*—If applicable, explain how matching of cases and controls was addressed  
*Cross-sectional study*—If applicable, describe analytical methods taking account of sampling strategy
- 
- (e) Describe any sensitivity analyses **Yes, Page 8-9**

Continued on next page

**Results**

|                  |     |                                                                                                                                                                                                                                                                                                                                                                                                                                                     |
|------------------|-----|-----------------------------------------------------------------------------------------------------------------------------------------------------------------------------------------------------------------------------------------------------------------------------------------------------------------------------------------------------------------------------------------------------------------------------------------------------|
| Participants     | 13* | (a) Report numbers of individuals at each stage of study—eg numbers potentially eligible, examined for eligibility, confirmed eligible, included in the study, completing follow-up, and analysed <b>Yes, Page 10-11</b><br>(b) Give reasons for non-participation at each stage <b>Yes, Page 10-11</b><br>(c) Consider use of a flow diagram <b>Yes, Figure 1</b>                                                                                  |
| Descriptive data | 14* | (a) Give characteristics of study participants (eg demographic, clinical, social) and information on exposures and potential confounders <b>Yes, Page 10</b><br>(b) Indicate number of participants with missing data for each variable of interest <b>Yes, Page 10</b><br>(c) <i>Cohort study</i> —Summarise follow-up time (eg, average and total amount)                                                                                         |
| Outcome data     | 15* | <i>Cohort study</i> —Report numbers of outcome events or summary measures over time<br><i>Case-control study</i> —Report numbers in each exposure category, or summary measures of exposure<br><i>Cross-sectional study</i> —Report numbers of outcome events or summary measures                                                                                                                                                                   |
| Main results     | 16  | (a) Give unadjusted estimates and, if applicable, confounder-adjusted estimates and their precision (eg, 95% confidence interval). Make clear which confounders were adjusted for and why they were included <b>Yes, Tables</b><br>(b) Report category boundaries when continuous variables were categorized <b>Yes, tables</b><br>(c) If relevant, consider translating estimates of relative risk into absolute risk for a meaningful time period |
| Other analyses   | 17  | Report other analyses done—eg analyses of subgroups and interactions, and sensitivity analyses <b>Yes, Page 10</b>                                                                                                                                                                                                                                                                                                                                  |

**Discussion**

|                  |    |                                                                                                                                                                                                   |
|------------------|----|---------------------------------------------------------------------------------------------------------------------------------------------------------------------------------------------------|
| Key results      | 18 | Summarise key results with reference to study objectives <b>Yes, Page 11</b>                                                                                                                      |
| Limitations      | 19 | Discuss limitations of the study, taking into account sources of potential bias or imprecision. Discuss both direction and magnitude of any potential bias <b>Yes, Page 11</b>                    |
| Interpretation   | 20 | Give a cautious overall interpretation of results considering objectives, limitations, multiplicity of analyses, results from similar studies, and other relevant evidence <b>Yes, Page 11-13</b> |
| Generalisability | 21 | Discuss the generalisability (external validity) of the study results <b>Yes, Page 11</b>                                                                                                         |

**Other information**

|         |    |                                                                                                                                                                                   |
|---------|----|-----------------------------------------------------------------------------------------------------------------------------------------------------------------------------------|
| Funding | 22 | Give the source of funding and the role of the funders for the present study and, if applicable, for the original study on which the present article is based <b>Yes, Page 15</b> |
|---------|----|-----------------------------------------------------------------------------------------------------------------------------------------------------------------------------------|

\*Give information separately for cases and controls in case-control studies and, if applicable, for exposed and unexposed groups in cohort and cross-sectional studies.

**Note:** An Explanation and Elaboration article discusses each checklist item and gives methodological background and published examples of transparent reporting. The STROBE checklist is best used in conjunction with this article (freely available on the Web sites of PLoS Medicine at <http://www.plosmedicine.org/>, Annals of Internal Medicine at <http://www.annals.org/>, and Epidemiology at <http://www.epidem.com/>). Information on the STROBE Initiative is available at [www.strobe-statement.org](http://www.strobe-statement.org).

# BMJ Open

## Title: Adiposity measures and arterial stiffness in primary care: the MARK prospective observational study

|                                 |                                                                                                                                                                                                                                                                                                                                                                                                                                                                                                                                                                                                                                                                                                                                                                                                                                                                                                                                                                                                                                                                                                                                                                                                                                                                                                                                                                                                                                                                                                 |
|---------------------------------|-------------------------------------------------------------------------------------------------------------------------------------------------------------------------------------------------------------------------------------------------------------------------------------------------------------------------------------------------------------------------------------------------------------------------------------------------------------------------------------------------------------------------------------------------------------------------------------------------------------------------------------------------------------------------------------------------------------------------------------------------------------------------------------------------------------------------------------------------------------------------------------------------------------------------------------------------------------------------------------------------------------------------------------------------------------------------------------------------------------------------------------------------------------------------------------------------------------------------------------------------------------------------------------------------------------------------------------------------------------------------------------------------------------------------------------------------------------------------------------------------|
| Journal:                        | <i>BMJ Open</i>                                                                                                                                                                                                                                                                                                                                                                                                                                                                                                                                                                                                                                                                                                                                                                                                                                                                                                                                                                                                                                                                                                                                                                                                                                                                                                                                                                                                                                                                                 |
| Manuscript ID                   | bmjopen-2017-016422.R1                                                                                                                                                                                                                                                                                                                                                                                                                                                                                                                                                                                                                                                                                                                                                                                                                                                                                                                                                                                                                                                                                                                                                                                                                                                                                                                                                                                                                                                                          |
| Article Type:                   | Research                                                                                                                                                                                                                                                                                                                                                                                                                                                                                                                                                                                                                                                                                                                                                                                                                                                                                                                                                                                                                                                                                                                                                                                                                                                                                                                                                                                                                                                                                        |
| Date Submitted by the Author:   | 27-Apr-2017                                                                                                                                                                                                                                                                                                                                                                                                                                                                                                                                                                                                                                                                                                                                                                                                                                                                                                                                                                                                                                                                                                                                                                                                                                                                                                                                                                                                                                                                                     |
| Complete List of Authors:       | Gomez-Sanchez, Leticia; La Alamedilla health centre., Primary Care Research Unit; 2. Biomedical Research Institute of Salamanca (IBSAL) Garcia-Ortiz, Luis; La Alamedilla health centre. University of Salamanca, Primary care research unit La Alamedilla Patino-Alonso, Maria; University of Salamanca, Salamanca, Spain , Statistics Department, Recio-Rodriguez, Jose; La Alamedilla Health Center, Primary Care Research Unit, The Alamedilla Health Center, Castilla and León Health Service (SACYL), Biomedical Research Institute of Salamanca (IBSAL) Frigo, Fernando; Illes Balears Health Service (IBSALUT) Marti, Rhut; Institut Universitari d'Investigació en Atenció Primària Jordi Gol (IDIAP Jordi Gol), Unitat de Suport a la Recerca de Girona. Agudo-Conde, Cristina; La Alamedilla Health Center,, Research Unit Rodriguez-Sanchez, Emiliano; Primary Care Research Unit, The Alamedilla Health Center, Salamanca, Spain, ; Biomedical Research Institute of Salamanca (IBSAL), Maderuelo-Fernandez, Jose; Salamanca Institute for Biomedical Research. (IBSAL)., Primary care research unit La Alamedilla, Castilla and León Health Service (SACYL). Network of Preventive Activities and Health Promotion in Primary Care (REDIAPP) Ramos, Rafel; Universidad de Girona. Departament Medicina Gomez-Marcos, Manuel; the Alamedilla Health Center, Castilla and León Health Service (SACYL), Primary Care Research Unit; University of Salamanca,, Department of Medicine |
| <b>Primary Subject Heading</b>: | Cardiovascular medicine                                                                                                                                                                                                                                                                                                                                                                                                                                                                                                                                                                                                                                                                                                                                                                                                                                                                                                                                                                                                                                                                                                                                                                                                                                                                                                                                                                                                                                                                         |
| Secondary Subject Heading:      | Diabetes and endocrinology, Epidemiology, Nutrition and metabolism                                                                                                                                                                                                                                                                                                                                                                                                                                                                                                                                                                                                                                                                                                                                                                                                                                                                                                                                                                                                                                                                                                                                                                                                                                                                                                                                                                                                                              |
| Keywords:                       | Body mass index, Waist circumference, Waist-to-height ratio, Fat mass percent., Body roundness index., Arterial stiffness                                                                                                                                                                                                                                                                                                                                                                                                                                                                                                                                                                                                                                                                                                                                                                                                                                                                                                                                                                                                                                                                                                                                                                                                                                                                                                                                                                       |
|                                 |                                                                                                                                                                                                                                                                                                                                                                                                                                                                                                                                                                                                                                                                                                                                                                                                                                                                                                                                                                                                                                                                                                                                                                                                                                                                                                                                                                                                                                                                                                 |

SCHOLARONE™  
Manuscripts



1  
2  
3 1 **Title: Adiposity measures and arterial stiffness in primary care: the MARK prospective**  
4 **observational study**

5  
6 3 **Authors:** Leticia Gomez-Sanchez MD <sup>1,2\*</sup>, Luis Garcia-Ortiz MD, PhD <sup>1,2,3</sup>, Maria C Patino-  
7  
8 4 Alonso PhD <sup>1,2,4</sup>, Jose I Recio-Rodriguez PhD <sup>1,2,5</sup>, Rigo Fernando MD, PhD <sup>6</sup>, Ruth Marti  
9  
10 5 PhD <sup>7,8</sup>, Cristina Agudo-Conde <sup>1,2</sup>, Emiliano Rodriguez-Sanchez MD, PhD <sup>1,2,9</sup>, Jose A  
11  
12 6 Maderuelo-Fernandez MD, PhD <sup>1,2</sup>, Rafel Ramos MD, PhD <sup>7,8,10</sup> and Manuel A Gomez-  
13  
14 7 Marcos MD, PhD <sup>1,2,9</sup> for the MARK Group <sup>11</sup>

15  
16 8 1. Primary Care Research Unit, the Alamedilla Health Center, Castilla and León Health  
17  
18 9 Service (SACyL), Salamanca, Spain

19  
20 10 2. Biomedical Research Institute of Salamanca (IBSAL), Salamanca, Spain

21  
22 11 3. Biomedical and diagnostic sciences department, University of Salamanca, Salamanca,  
23  
24 12 Spain

25  
26 13 4. Statistics Department, University of Salamanca, Salamanca, Spain

27  
28 14 5. Department of Nursing and Physiotherapy, University of Salamanca, Salamanca, Spain

29  
30 15 6. San Agustín Health Center, Illes Balears Health Service (IBSALUT), Palma of Mallorca,  
31  
32 16 Spain

33  
34 17 7. Unitat de Suport a la Recerca de Girona. Institut Universitari d'Investigació en Atenció  
35  
36 18 Primària Jordi Gol (IDIAP Jordi Gol), Girona, Spain

37  
38 19 8. Institut d'Investigació Biomèdica of Girona Dr. Josep Trueta (IDBGI). Girona, Spain

39  
40 20 9. Department of Medicine, University of Salamanca, Salamanca, Spain

41  
42 21 10. Departament de Ciències Mèdiques, Facultat de Medicina. Universitat de Girona, Spain.

43  
44 22 11. MARK Group. redIAPP: Research Network in Preventive Activities and Health  
45  
46 23 Promotion, Girona, Spain

47  
48 24 **\*Corresponding Author:**

49  
50 25 Leticia Gomez-Sanchez, Primary Care Research Unit, Alamedilla Health Care Center

51  
52 26 37003 Salamanca, Spain

53  
54 27 E-mail addresses: leticiagmzsncz@gmail.com

55  
56 28 Full list of author information is available at the end of the article.

57  
58 29

1  
2  
3 **ABSTRACT**  
4

5 **Background:** The cardiovascular risk in obesity is potentially increased by arterial stiffness.  
6

7 **Objective:** This study investigates the relationship of adiposity measures with arterial  
8 stiffness in Caucasian adults with intermediate cardiovascular risk and determines the best  
9  
10 measures to explain arterial stiffness.  
11  
12

13  
14 **Setting:** Six primary care centers in three Spanish Autonomous Communities, Spain  
15

16 **Participants:** This study analyzed 2354 subjects (age range, 35–74 years; mean age, 61.4±7.7  
17  
18 years, 61.9% male).  
19

20 **Methods:** The study was based on cross-sectional data from the MARK study. The main  
21  
22 outcome variables were: body mass index (BMI), waist-to-height ratio (WHtR), University  
23  
24 clinic of Navarra body adiposity estimation (CUN-BAE) body fat percentage, and body  
25  
26 roundness index (BRI). Vascular function was assessed by the cardio-ankle vascular index  
27  
28 (CAVI) with the VaSera device, and brachial ankle pulse wave velocity (baPWV) was  
29  
30 determined using a validated equation.  
31  
32  
33

34 **Results:** The mean adiposity measures were a BMI of 29.2±4.4, WHtR of 0.61±0.07, CUN-  
35  
36 BAE of 35.7±1.7, and BRI of 5.8±1.7. The mean stiffness measures were a CAVI of 8.8±1.2  
37  
38 and baPWV of 14.9±2.5. In multiple linear regression analysis, all adiposity measures were  
39  
40 negatively associated with CAVI and baPWV (p<0.01 for all) after adjustment for  
41  
42 cardiovascular risk factors. The proportion of CAVI variability explained by the adiposity  
43  
44 measures were 5.5% for BMI, 5.8% for CUN-BAE, 3.8% for WHtR, and 3.7% for BRI,  
45  
46 which were higher among diabetic, obese, younger ( $\leq 62$  years), and non-hypertensive  
47  
48 subjects who had similar activity and sedentary profiles.  
49  
50

51 **Conclusions:** Adiposity measures are negatively associated with arterial stiffness measures.  
52  
53 The arterial stiffness variability is better explained for BMI and CUN-BAE and when CAVI  
54  
55 is used as a measure of stiffness rather than baPWV.  
56  
57  
58  
59  
60

1  
2  
3 1 **Trial Registration:** Clinical Trials.gov Identifier: [https://clinicaltrials.gov/ct2/show/](https://clinicaltrials.gov/ct2/show/NCT01428934)  
4  
5 2 NCT01428934. Registered 2 September 2011. Last updated September 8, 2016.  
6

7 3 **Keywords:** body mass index, waist circumference, waist-to-height ratio, fat mass percent,  
8  
9 4 body roundness index, arterial stiffness  
10  
11

12 5  
13  
14 6 **Strengths and limitations of this study**

15  
16 7 • This is the first study to investigate the association between adiposity measures using a  
17  
18 8 cardio-ankle vascular index with and brachial ankle pulse wave velocity in Caucasian adults  
19  
20 9 with intermediate cardiovascular risk.  
21

22  
23 10 • All adiposity measures were negatively associated with CAVI and baPWV.  
24

25 11 • The arterial stiffness variability was better explained for BMI and CUN-BAE and  
26  
27 12 when CAVI was used as a measure of stiffness rather than baPWV.  
28

29 13 • The main limitation of our study is its cross-sectional design, which does not allow  
30  
31 14 establishment of causal relationships or the direction in which adiposity measures influence  
32  
33 15 vascular function.  
34  
35

36 16  
37  
38  
39  
40  
41  
42  
43  
44  
45  
46  
47  
48  
49  
50  
51  
52  
53  
54  
55  
56  
57  
58  
59  
60

## 1 INTRODUCTION

2 Obesity has been linked to increased all-cause and cardiovascular mortality <sup>(1)</sup>. However, the  
3 mechanisms through which obesity can increase the frequency of cardiovascular disease  
4 beyond traditional risk factors are not clearly identified <sup>(2)</sup>. Arterial stiffness as evaluated by  
5 the brachial ankle pulse wave velocity (baPWV) is an independent predictor of coronary heart  
6 disease and mortality in both the general population <sup>(3)</sup> and in patients with diabetes mellitus  
7 <sup>(4; 5)</sup>. Similarly, the cardio-ankle vascular index (CAVI) is associated with carotid and  
8 coronary atherosclerosis <sup>(6; 7; 8)</sup> and is a predictor of cardiovascular events in obese patients <sup>(9)</sup>.

9 Increased arterial stiffness may be a mechanism by which obesity increases cardiovascular  
10 risk independently of traditional risk factors. However, the relationship between adiposity and  
11 arterial stiffness remains controversial. The body mass index (BMI) has been associated with  
12 arterial stiffness in the general population <sup>(10; 11)</sup> and in diabetic patients <sup>(12; 13)</sup>. However, other  
13 research has not found this association <sup>(14)</sup>, the association disappeared after adjusting for  
14 potential confounders <sup>(13)</sup>, or it showed a negative association <sup>(15; 16)</sup>. Additionally, there are  
15 studies that suggest a stronger correlation of measures of central or visceral adiposity than  
16 measures of general adiposity with arterial stiffness in the general population <sup>(10; 17; 18; 19; 20)</sup>, in  
17 diabetic patients <sup>(13)</sup>, and in diabetics and hypertensive patients <sup>(21)</sup>. The Whitehall II Cohort  
18 study <sup>(22)</sup> showed that all measures of general adiposity, central adiposity, and body fat  
19 percentage were predictors of accelerated arterial stiffness in adults.

20 Cardiovascular events are more likely to occur in patients with intermediate cardiovascular  
21 risk <sup>(23)</sup>, and there is a lack of studies analyzing the relationship of different adiposity  
22 measures with arterial stiffness in these subjects. Thus, the primary aim of this study was to  
23 investigate the relationship between adiposity measures and arterial stiffness in Caucasian  
24 adults with intermediate cardiovascular risk. The secondary aim was to determine which  
25 adiposity measures best explain arterial stiffness.

1  
2  
3 14  
5 2 **METHODS**6  
7 3 **Study design**

8  
9 4 This trial is a cross-sectional study of subjects recruited to the *improving interMediAte RisK*  
10 5 *management (MARK)* study ([NCT01428934](#))<sup>(24)</sup>, which is a longitudinal study designed to  
11 6 assess whether the ankle-brachial index, arterial stiffness (measured by CAVI), postprandial  
12 7 glucose, glycosylated hemoglobin, self-measured blood pressure, and the presence of  
13 8 comorbidities are independently associated with the occurrence of vascular events. It also  
14 9 investigates whether the predictive capacity of current risk equations can be improved in the  
15 10 intermediate risk population. The current study focuses on the baseline visit. The second step  
16 11 will be a 5- and 10-year follow-up trial to assess cardiovascular morbidity and mortality.  
17 12

18  
19  
20  
21  
22  
23  
24  
25  
26  
27  
28  
29 13 **Study population**

30  
31 14 In this multicenter project, the study population was obtained by random sampling from  
32 15 subjects who met the inclusion criteria and who were seeing general practitioners from July  
33 16 2011 to June 2013 at six primary care centers in three Spanish Autonomous Communities.  
34 17 Subjects were recruited from those aged 35 to 74 years with an intermediate cardiovascular  
35 18 risk, defined as a 10-year coronary risk ranging from 5%–15% according to the adapted  
36 19 Framingham risk equation<sup>(25)</sup>; a 10-year vascular mortality risk ranging from 1%–5%  
37 20 according to the scoring risk in Europeans equation<sup>(26)</sup>; or a moderate risk according to the  
38 21 European Society of Hypertension guidelines for the management of arterial hypertension<sup>(27)</sup>.  
39 22 Exclusion criteria included end-stage disease or institutionalization at the time of the visit, or  
40 23 history of atherosclerotic disease. This study analyzed 2354 of the 2495 subjects recruited in  
41 24 the MARK study, and the exclusion criteria are shown in Figure 1.  
42 25

## 1 Variables and measurement instruments

2 A detailed description of procedures for clinical data collection and laboratory tests has been  
3 published elsewhere<sup>(24)</sup>.

## 5 Anthropometric measurements

6 Body weight was measured twice using a certified electronic scale (Seca 770, Medical scale  
7 and measurement systems, Birmingham, United Kingdom) after adequate calibration  
8 (precision  $\pm 0.1$  kg). Readings were rounded-off to the nearest 100 g. Height was measured  
9 using a stadiometer (Seca 222), and the average of two measurements was recorded. Body  
10 mass index (BMI) was calculated as weight (kg) divided by height squared ( $m^2$ ). Waist  
11 circumference was measured according to the 2007 recommendations of the Spanish Society  
12 for the Study of Obesity<sup>(28)</sup>. All measurements were performed with the subjects standing,  
13 wearing no shoes, and in light clothing. Waist-to-height ratio (WHtR) was calculated as the  
14 waist circumference (cm) divided by height (cm)<sup>(29;30)</sup>.

15 The body fat percentage (BF%) was calculated according to the University clinic of  
16 Navarra - body adiposity estimator (CUN-BAE) using the recommendations of Gomez-  
17 Ambrosi et al.<sup>(31)</sup>:  $BF\% = -44.988 + (0.503 \times \text{Age}) + (10.689 \times \text{sex}) + (3.172 \times \text{BMI}) - (0.026$   
18  $\times \text{BMI}^2) + (0.181 \times \text{BMI} \times \text{sex}) - (0.02 \text{ BMI} \times \text{Age}) - (0.005 \times \text{BMI}^2 \times \text{sex}) +$   
19  $(0.00021 \times \text{BMI}^2 \times \text{Age})$ , where male=0 and female=1 for sex.

20 Body roundness index (BRI) was calculated using the following formula:  $BRI = 364.2 -$

21  $365.5 \times \sqrt{1 - \left(\frac{WC/(2\pi)}{0.5 \text{height}}\right)^2}$ <sup>(32)</sup>. BRI can predict the percentage of body fat and visceral adipose  
22 tissue.

## 24 Cardio-ankle vascular index (CAVI) and brachial-ankle pulse wave velocity (baPWV)

1  
2  
3 1 CAVI was measured using a *VaSera VS-1500®* device (*Fukuda Denshi*)<sup>(33; 34)</sup>. CAVI values  
4  
5 2 are calculated automatically by estimating the stiffness parameter  $\beta$  using the following  
6  
7 3 equation:  $\beta = 2\rho \times 1 / (Ps - Pd) \times \ln (Ps / Pd) \times PWV^2$ , where  $\rho$  is blood density, Ps and Pd  
8  
9 4 are SBP and DBP in mmHg, and PWV is measured between the aortic valve and the ankle  
10  
11 5 <sup>(35)</sup>. The mean coefficient of variation of CAVI measurement is less than 5%, which is small  
12  
13 6 enough to allow for clinical use of the index and confirms that CAVI has a favorable  
14  
15 7 reproducibility<sup>(34)</sup>.

18  
19 8 CAVI was calculated using the *VaSera VS-1500®* device (*Fukuda Denshi*), and with the  
20  
21 9 values obtained, the baPWV was estimated using the equation  $baPWV = (0.5934 \times \text{height}$   
22  
23 10  $(\text{cm}) + 14.4724) / tba$  (where tba is the time interval between the arm and ankle waves)<sup>(36)</sup>.

25  
26 11 Measurements were performed with the patient in the supine position after resting for 10  
27  
28 12 minutes in a quiet room at a stable temperature. Subjects were instructed not to smoke or  
29  
30 13 exercise in the hour before the test.

### 34 15 **Diagnosis of cardiovascular risk factors**

36  
37 16 Subjects were considered to be hypertensive if they were previously diagnosed with  
38  
39 17 hypertension, if they were taking antihypertensive drugs, or if they had blood pressure levels  
40  
41 18  $\geq 140/90$  mmHg. Diabetic subjects were those who had been previously diagnosed with the  
42  
43 19 disease, were taking hypoglycemic drugs, or had a fasting blood glucose levels  $\geq 126$  mg/dL  
44  
45 20 or HbA1c  $\geq 6.5\%$ . Dyslipidemia was defined if they were treated with lipid-lowering drugs or  
46  
47 21 had altered LDL  $\geq 130$  mg/dl, HDL  $\leq 45$  mg/dl in men and  $\leq 55$  in women, and TG  $\geq 150$   
48  
49 22 mg/dl, as established by the European Society of Cardiology (ESC) and the European  
50  
51 23 Atherosclerosis Society (EAS) 2011<sup>(37)</sup>.

### 56 25 **Office or clinical blood pressure**

1 Office blood pressure measurement involved three measurements of SBP and DBP using a  
2 validated OMRON model M10-IT sphygmomanometer (Omron Health Care, Kyoto, Japan).  
3 The measurements followed the recommendations of the European Society of Hypertension  
4 <sup>(38)</sup>, and the average of the last two measurements was used.

## 6 **Lifestyles**

### 7 **Tobacco**

8 Smoking history was assessed by asking questions about the participant's smoking status  
9 (smoker/non-smoker). We considered smokers to include those who currently smoke or who  
10 had stopped smoking within the past year.

### 12 **Leisure time physical activity**

13 Leisure time physical activity (LTPA) was collected using the Minnesota LTPA Questionnaire  
14 <sup>(39)</sup> that was validated for Spanish men and women<sup>(40; 41)</sup>. The questionnaire was administered  
15 by trained interviewers who spent about 10 to 20 min per participant collecting detailed  
16 information about physical activity (PA) during the preceding year, the number of times this  
17 activity was performed, and the average duration of each activity on each occasion. Each PA  
18 has an intensity code, based on the ratio between the metabolic rate during PA practice and the  
19 basal metabolic rate (MET) <sup>(42)</sup>. We assumed that 1 MET approximately corresponds to 1  
20 kcal/min of energy expenditure. Therefore, we can calculate the total energy expenditure in  
21 leisure time of PA (EEPA<sub>total</sub>) in kilocalories per week. Moreover, based on the PA intensity  
22 code, we could quantify the energy expenditure in physical activity (EEPA) according to the  
23 activity's classification as intense, moderate, or light intensity as follows: light PA intensity is  
24 below 4 METs, such as walking (EEPA<sub>light</sub>). Moderate PA intensity is 4–5.5 METs, such as  
25 brisk walking (EEPA<sub>moderate</sub>). Intense PA intensity is greater than or equal to 6 METs, such as  
26 jogging (EEPA<sub>intense</sub>). Thus, for each particular subject: EEPA<sub>total</sub> = EEPA<sub>light</sub> + EEPA<sub>moderate</sub>  
27 + EEPA<sub>intense</sub>.

28 Based on recommendations from the American Heart Association <sup>(43)</sup>, we considered those  
29 participants who do not meet the recommendations of moderate-intensity aerobic PA practice



1  
2  
3 1 for a minimum of 30 min on 5 days each week (EEPA<sub>moderate</sub> < 675 kcal/week) or high-  
4 2 intensity aerobic PA practice for a minimum of 20 min on 3 days each week (EEPA<sub>intense</sub> <  
5 3 420 kcal/week) to be sedentary.  
6  
7  
8  
9 4

### 10 5 **Laboratory determinations**

11  
12 6 Venous blood sampling was performed between 08:00 and 09:00 hours after the individuals  
13 7 fasted and abstained from smoking and the consumption of alcohol and caffeinated beverages  
14 8 for the previous 12 hours. Fasting plasma glucose, serum, high-density lipoprotein (HDL)  
15 9 cholesterol concentrations and triglyceride concentrations were measured using standard  
16 10 enzymatic automated methods. Low-density lipoprotein cholesterol was estimated using the  
17 11 Friedewald equation when the direct parameter was not available. The atherogenic index was  
18 12 estimated (total cholesterol / HDL cholesterol). Blood samples were collected at the Health  
19 13 Center and analyzed at the hospital of reference.  
20  
21  
22  
23  
24  
25  
26  
27  
28  
29

30 14 The researchers who performed the different tests were blinded to the clinical data of the  
31 15 subjects. All assessments were made within a period of 10 days.  
32  
33  
34  
35  
36

### 37 17 **Data analysis**

38  
39 18 Continuous variables were expressed as the mean  $\pm$  standard deviation. Frequency  
40 19 distributions were used for categorical data. Comparisons between quantitative variables were  
41 20 performed using the Student's *t*-test, while the chi-squared test and Fisher's exact test were  
42 21 used for qualitative variables. Pearson's correlation coefficient was used to estimate the  
43 22 relationship of the adiposity measures to CAVI and baPWV.  
44  
45  
46  
47  
48  
49

50 23 Four different multiple linear regression models were used to analyze the associations of  
51 24 each adiposity measure with CAVI, and four other models were used with baPWV. CAVI and  
52 25 baPWV were the dependent variables, and the adiposity measures were the independent  
53 26 variables in each model. All models were adjusted for age (years), sex (0 = male and 1 =  
54  
55  
56  
57  
58  
59  
60

1 female), systolic blood pressure (SBP), smoking status (0 = No and 1 = Yes), atherogenic  
2 index, HbA1c, and METs/min/week. The explanatory capacity of the model was measured by  
3  $R^2$ , and the proportion attributed to each variable was estimated by the change in  $R^2$ . The  
4 analysis was also performed by age groups, diagnosis of diabetes, hypertension, and obesity.

5 ANCOVA models were used to test the differences in the mean values of CAVI and  
6 baPWV with the quartiles of the four adiposity measures after adjusting for the confounding  
7 variables that were used in the regression analysis. Pairwise post hoc comparisons were  
8 examined using the Bonferroni test. Data were analyzed using SPSS Statistics for Windows  
9 version 23.0 (IBM Corp, Armonk, NY). Values of  $p < 0.05$  were considered statistically  
10 significant.

## 11

### 12 **Ethics statement**

13 All participants were informed of the study objectives and procedures and they all signed an  
14 informed consent form to participate. The study was approved by the Clinical Research Ethics  
15 Committee of the Primary Care Research Institute Jordi Gol, the Health Care Area of  
16 Salamanca, and Palma of Mallorca. The study was conducted following the recommendations  
17 of the Declaration of Helsinki<sup>(44)</sup>. The confidentiality of information provided by participants  
18 was ensured, complying with the rules established by Spanish Organic Law 15/1999, of 13  
19 December on the Protection of Personal Data.

## 20

### 21 **RESULTS**

22 Anthropometric measures, clinical characteristics, and vascular function measures of the  
23 subjects are presented in Table 1. The mean age of the patients was  $61.4 \pm 7.7$  years, and  
24 61.9% were male. Male subjects had a higher percentage of smokers (31.5 vs. 22.7) and  
25 hypertension (80.1 vs. 75.4) compared with females. However, females had a higher

1  
2  
3 1 prevalence of obesity (40.4 vs. 33.4), sedentariness (53.7 vs. 37.0), dyslipidemia (73.1 vs.  
4  
5 2 63.6), and diabetes (36.5 vs. 31.8) compared with males. The mean value of CAVI was  
6  
7 3 8.8±1.2 (8.9 in males and 8.6 in females,  $p<0.001$ ) and the mean baPWV was 14.9±2.5 (14.8  
8  
9 4 in males and 15.0 in females). All of the analyzed adiposity measures except for waist  
10  
11 5 circumference presented higher values in women compared with men.

12  
13  
14 6 Pearson's correlation coefficient results between the adiposity measures and the vascular  
15  
16 7 function parameters are shown in Table 2. All adiposity measures were negatively correlated  
17  
18 8 with CAVI, and this correlation increases after adjusting for age, sex, and SBP. The  
19  
20 9 correlation between CAVI and baPWV was  $r=0.745$  ( $p<0.001$ ).

21  
22  
23 10 Figure 1S (Supplementary material) shows the estimated marginal means of CAVI (a) and  
24  
25 11 baPWV (b) by quartiles of the different adiposity measures. After adjustment for the variables  
26  
27 12 used in the multiple linear regression analysis, the mean CAVI values decreased as the  
28  
29 13 quartiles of the four adiposity measurements increased ( $p<0.05$ ). However, the same is not  
30  
31 14 true of baPWV with WHtR and BRI ( $p>0.05$ ).

32  
33  
34 15 In the multiple linear regression analysis, CAVI and baPWV showed negative associations  
35  
36 16 with all adiposity measures ( $p<0.01$  for all) after adjustment for age, sex, SBP, smoking,  
37  
38 17 atherogenic index, HbA1c, and METs/min/week (Table 3). The proportion of CAVI  
39  
40 18 variability explained in the respective multiple linear regression analyses by the adiposity  
41  
42 19 measures was 5.5% for BMI, 5.8% for CUN-BAE, 3.8% for WHtR, and 3.7% for BRI. For  
43  
44 20 baPWV, the variance explained by the measures of adiposity were 0.7% for BMI, and CUN-  
45  
46 21 BAE, and 0.1% for WHtR, and 0.2 for BRI.

47  
48  
49 22 In the multiple linear regression analysis by subgroup, the proportion of CAVI variability  
50  
51 23 explained by adiposity measures was higher among diabetics, obese, non-hypertensive, and  
52  
53 24 subjects 62 years of age or younger, and was similar in active and sedentary people (Table 4).  
54  
55  
56  
57  
58  
59  
60

## 1 DISCUSSION

2 The results of this study show that adiposity measures have a negative association with  
3 arterial stiffness, especially CAVI. BMI and CUN-BAE better explain the variability of CAVI  
4 and baPWV than the WHtR and the BRI, and the explanatory capacity was higher in the case  
5 of CAVI. We found a negative association of different adiposity measures with CAVI and  
6 baPWV after adjustment for other cardiovascular risk factors.

7 In this study the mean value of CAVI was higher in males, which is in agreement with  
8 published data indicating that CAVI increases linearly with age, and is higher in males than in  
9 females (approximately 0.2, which is equivalent to 4–5 years old)<sup>(22; 45)</sup>. Similarly, there was  
10 no difference in the mean baPWV between the sexes, which is consistent with data published  
11 by Tomiyama et al.<sup>(46)</sup> who showed that the effect of age on baPWV is different according to  
12 sex. Females have a higher arterial stiffness than prepubertal males, and this increases after  
13 menopause. Men, however, experience a linear increase in arterial stiffness from puberty.  
14 This suggests that women have large arteries that are intrinsically more rigid compared with  
15 men, but these effects are mitigated by sex steroids during the reproductive years<sup>(47; 48)</sup>.

16 This negative association with CAVI has already been described in previous studies. BMI  
17 has shown a negative association in children<sup>(49)</sup>, and in hypertensive and type 2 diabetes  
18 patients in Ghana<sup>(50)</sup>. Similarly, waist circumference has shown a negative relationship in  
19 subjects with metabolic syndrome<sup>(51; 52)</sup>.

20 However, other authors have described a positive association of different adiposity  
21 measures with the  $\beta$ -stiffness parameter, but after adjustment for age and other possible  
22 confounding factors, the association remained for only men with type 2 diabetes mellitus<sup>(53)</sup>.  
23 Other studies have also found no association between BMI and CAVI<sup>(54)</sup>.

24 Studies analyzing the association of adiposity measures with baPWV have also been  
25 performed mainly in Eastern populations and have focused on assessing the association

1  
2  
3 1 between BMI and waist circumference as measures of adiposity. The results are controversial,  
4  
5 2 with some finding a negative association with BMI <sup>(46)</sup>, and with waist circumference in men  
6  
7 3 only or in women only <sup>(55), (56)</sup>. However, other studies have found a positive correlation with  
8  
9 4 BMI and waist circumference <sup>(57)</sup>. One study that analyzed the association of different  
10  
11 5 adiposity parameters with baPWV in middle-aged adults found a positive association with  
12  
13 6 waist circumference and visceral fat but not with body fat percentage <sup>(58)</sup>.

16 7 The results are also not consistent in studies that used the carotid-femoral pulse wave  
17  
18 8 velocity (cfPWV) as a measure of stiffness. Some studies have described a greater association  
19  
20 9 with measures of central or visceral adiposity in both the general population and in diabetics  
21  
22 10 <sup>(10; 13; 17; 18; 19; 21)</sup>. However, Strasser et al. <sup>(58)</sup> found no association with body fat percentage,  
23  
24 11 and other studies also found no association between BMI and cfPWV <sup>(13; 14)</sup>. Rodrigues et al.  
25  
26 12 <sup>(15)</sup>, reported that BMI was negatively associated with cfPWV ( $\beta = -0.103$ ) in a large  
27  
28 13 population sample. The Whitehall II Cohort study <sup>(22)</sup>, which was completed based on staff  
29  
30 14 lists from offices located in central London, showed that all measures of adiposity were robust  
31  
32 15 predictors of accelerated CFPWV, after adjusting them for potential confounding factors. The  
33  
34 16 use of different measures to measure arterial stiffness such as CAVI and baPWV, as well as  
35  
36 17 being a population with intermediate cardiovascular risk could explain some of the  
37  
38 18 discrepancies with our study.

42 19 Arterial stiffness depends on arterial wall elasticity and diameter, and a positive correlation  
43  
44 20 was found between BMI and aortic diameter measured by nuclear magnetic resonance <sup>(59)</sup>.  
45  
46 21 This could partially explain the negative association between measures of adiposity and  
47  
48 22 arterial stiffness. These discrepancies between studies may be partially explained by different  
49  
50 23 methods of arterial stiffness measurement and the adjustment variables used. This may be  
51  
52 24 because CAVI reflects central and peripheral arterial stiffness and is less influenced by blood  
53  
54 25 pressure values at the time of measurement <sup>(35; 60; 61)</sup>. Conversely, arterial stiffness assessed

1 using baPWV is a measure of peripheral arterial stiffness <sup>(36)</sup>. Other potential influences on  
2 the observed differences are age, sex, race, prevalent cardiovascular risk, and drugs used for  
3 treatment of the different risk factor <sup>(12; 46; 56; 57)</sup>.

4 The proportion of baPWV variability explained by adiposity measurements in our study  
5 was less than 1% (between 0.7% for BMI and 0.1% for CUN-BAE). The results are also  
6 lower than those published for the general population by Wohlfahrt et al. (5% for WHtR and  
7 3% for BMI) <sup>(10)</sup>, but similar to the results reported by Rodrigues et al. (BMI 0.7%) <sup>(15)</sup>. The  
8 proportion of CAVI variability that is explained by adiposity measures was higher than 5%  
9 with CUN-BAE and BMI and higher than 3.5% with WHtR and BRI. In the subgroup  
10 analysis, the proportion of CAVI variability explained by adiposity measures was higher in  
11 diabetic, obese, younger, and non-hypertensive subjects. Our results show that the influence  
12 of adiposity measurements on CAVI is greater than on baPWV. To our knowledge, no other  
13 study has analyzed this aspect using CAVI. The novel results of this study may have  
14 important clinical relevance because they show the associations of both general and  
15 abdominal obesity measures with CAVI and baPWV in subjects with intermediate  
16 cardiovascular risk. Additionally, the results provide information that could be used in new  
17 prospective studies and could potentially help to improve cardiovascular risk equations.

18 In summary, our results showed the correlation between measures of adiposity and  
19 measures of arterial stiffness is greater with CAVI than with baPWV. The different measures  
20 of adiposity better explain the variability of arterial stiffness evaluated using CAVI than using  
21 baPWV. All this suggests that the relationship with adiposity measures is greater if the  
22 arterial stiffness is measured using CAVI than using baPWV. This is likely because CAVI  
23 measures rigidity at the central and peripheral levels and it is not influenced by blood pressure  
24 at the time of measurement <sup>(35; 60; 62; 63)</sup>.

1  
2  
3 1 The main limitation of our study is its cross-sectional design, which does not allow us to  
4  
5 2 establish causal relationships or the direction of influence of adiposity measures in vascular  
6  
7 3 function. Another limitation is that the population was ethnically homogeneous (all subjects  
8  
9 4 were Caucasians with intermediate cardiovascular risk). Therefore, the extrapolation of our  
10  
11 5 findings may be limited.  
12  
13

## 14 6 15 16 7 **CONCLUSION**

17  
18 8 In conclusion, the adiposity measures analyzed show a negative association with arterial  
19  
20 9 stiffness measures. Arterial stiffness is better explained with BMI and CUN-BAE and when  
21  
22 10 using CAVI as a measure of stiffness rather than baPWV. These results suggest that measures  
23  
24 11 of general adiposity and body fat percentage better explain the variability of CAVI compared  
25  
26 12 with measures of abdominal and visceral adiposity.  
27  
28  
29  
30  
31

32 14 **Acknowledgments:** We are grateful to all professionals participating in the MARK study.

33  
34 15 Lead author for this group: Rafel Ramos, Research Unit, Primary Health Care, Girona, Jordi  
35  
36 16 Gol Institute for Primary Care Research (IDIAP Jordi Gol), Catalonia, Spain, E-mail:  
37  
38 17 rramos.girona.ics@gencat.net. Coordinating Center: Rafel Ramos, Ruth Martí, Dídac  
39  
40 18 Parramon, Anna Ponjoan, Miquel Quesada, Maria Garcia-Gil, Martina Sidera and Lourdes  
41  
42 19 Camós, Research Unit, Primary Health Care, Jordi Gol Institute for Primary Care Research  
43  
44 20 (IDIAP Jordi Gol), C/Maluquer Salvador, 11, 17002-Girona, Catalonia, Spain. Fernando  
45  
46 21 Montesinos, Ignacio Montoya, Carlos López, Anna Agell, Núria Pagès of the Primary Care  
47  
48 22 Services, Girona, Catalan Institute of Health (ICS), Catalonia, Spain. Irina Gil, Anna Maria-  
49  
50 23 Castro of the Primary Care Services, Girona, Institut d'Assistència Sanitaria (IAS), Catalonia,  
51  
52 24 Spain. Fernando Rigo, Guillermo Frontera, Antònia Rotger, Natalia Feuerbach, Susana Pons,  
53  
54 25 Natividad Garcia, John Guillaumet, Micaela Llull and Mercedes Gutierrez of the Health  
55  
56  
57  
58  
59  
60

1  
2  
3 1 Center Primary Care San Agustín, Ibsalut Balears, Spain. Cristina Agudo-Conde, Leticia  
4  
5 2 Gómez-Sanchez, Carmen Castaño-Sanchez, Carmela Rodriguez-Martín, Benigna Sanchez-  
6  
7 3 Salgado, Angela de Cabo-Laso, Emiliano Rodriguez-Sanchez, Jose Angel Maderuelo-  
8  
9 4 Fernandez, Marta Gómez-Sánchez, Emilio Ramos-Delgado, Carmen Patino-Alonso, Jose I  
10  
11 5 Recio-Rodriguez, Manuel A Gomez-Marcos and Luis Garcia-Ortiz, Primary Care Research  
12  
13 6 Unit of The Alamedilla, Salamanca, Spain, Castilla and León Health Service–SACYL.  
14  
15  
16  
17  
18

19 8 **Contributors:** LG-S designed the study, wrote the protocol, participated in fundraising,  
20  
21 9 interpreted the results, prepared the manuscript draft, performed all analytical testing,  
22  
23 10 interpreted the results and reviewed the manuscript and corrected the final version of the  
24  
25 11 manuscript. JIR-R, RM, FR, and CA-C participated in the study design, data collection and  
26  
27 12 manuscript review. ER-S and JAM-F participated in the study design, interpretation of results  
28  
29 13 and manuscript review. MCP-A participated in the analysis of results and final review of the  
30  
31 14 manuscript. LG-O, RR, and MAG-M participated in the protocol design, fundraising, analysis  
32  
33 15 of results, and final review of the manuscript. All authors reviewed and approved the final  
34  
35 16 version of the manuscript.  
36  
37  
38  
39  
40

41 18 **Funding:** This research was supported by grants from the Spanish Ministry of Science and  
42  
43 19 Innovation (MICINN), the Carlos III Health Institute/European Regional Development Fund  
44  
45 20 (ERDF) (MICINN, ISCIII/FEDER) (Red RedIAPP RD06/0018, Research Groups:  
46  
47 21 RD16/0007/0003, RD16/0007/0004, RD16/0007/0008), the Health Research Fund  
48  
49 22 (PI10/01088, PI10/02077, PI10/02043, PI13/01930), and the Regional Health Management of  
50  
51 23 Castile and León (GRS 635/A/11; GRS 906/B/14).  
52  
53  
54  
55

56 25 **Competing interests:** None declared.  
57  
58  
59  
60



1

2  
3  
4  
5 **Ethics approval:** The Clinical Research Ethics Committee of the Primary Care Research  
6  
7 Institute Jordi Gol, the Health Care Area of Salamanca and Palma of Mallorca.  
8

9

10  
11  
12 **Provenance and peer review:** Not commissioned; externally peer reviewed.  
13

14

15  
16 **Data sharing statement:** No additional data are available.  
17

18

19  
20  
21 **Informed consent:** Obtained.  
22

23

24  
25 **Open Access:** This is an Open Access article distributed in accordance with the Creative  
26  
27 Commons Attribution Non Commercial (CC BY-NC 4.0) license, which permits others to  
28  
29 distribute, remix, adapt, build upon this work non commercially, and license their derivative  
30  
31 works on different terms, provided the original work is properly cited and the use is non-  
32  
33 commercial. See: <http://creativecommons.org/licenses/by-nc/4.0/>  
34  
35

36

1  
2  
3 **1 Figure legends**  
4

5 **2 Figure 1.** Flow chart of this MARK substudy  
6

7 Abbreviations: N, number; CAVI, cardio-ankle vascular index; baPWV, brachial-ankle pulse  
8

9 wave velocity; ABI, ankle-brachial index; WC, waist circumference  
10  
11

12  
13  
14  
15  
16  
17  
18  
19  
20  
21  
22  
23  
24  
25  
26  
27  
28  
29  
30  
31  
32  
33  
34  
35  
36  
37  
38  
39  
40  
41  
42  
43  
44  
45  
46  
47  
48  
49  
50  
51  
52  
53  
54  
55  
56  
57  
58  
59  
60

For peer review only

1  
2  
3 **Figure 1S (Supplementary material).** Data are given as medias estimadas de CAVI y  
4  
5 baPWV por cuartiles de BMI, WHtR, CUN-BAE and BRI.

6  
7 Adjusted for age (years), sex (0=male and 1=female), systolic blood pressure smoking  
8  
9 (0=No and 1=Yes), atherogenic index, HbA1c, and METs/min/week  
10  
11  
12  
13  
14  
15  
16  
17  
18  
19  
20  
21  
22  
23  
24  
25  
26  
27  
28  
29  
30  
31  
32  
33  
34  
35  
36  
37  
38  
39  
40  
41  
42  
43  
44  
45  
46  
47  
48  
49  
50  
51  
52  
53  
54  
55  
56  
57  
58  
59  
60

108  
109  
110  
111  
112  
113  
114  
115  
116  
117  
118  
119  
120  
121  
122  
123  
124  
125  
126  
127  
128  
129  
130  
131  
132  
133  
134  
135  
136  
137  
138  
139  
140  
141  
142  
143  
144  
145  
146  
147  
148  
149  
150  
151  
152  
153  
154  
155  
156  
157  
158  
159  
160

baPWV and CAVI levels were compared using an ANOVA.

Abbreviations: CAVI, cardio-ankle vascular index; ba-PWV, brachial-ankle pulse wave  
velocity; BMI, body mass index; WHtR, waist-to-height ratio; CUN-BAE, University clinic  
of Navarra - body adiposity estimator; BRI, body roundness index

## References

1. Adams KF, Schatzkin A, Harris TB *et al.* (2006) Overweight, obesity, and mortality in a large prospective cohort of persons 50 to 71 years old. *N Engl J Med* **355**, 763-778.
2. Poirier P, Giles TD, Bray GA *et al.* (2006) Obesity and cardiovascular disease: pathophysiology, evaluation, and effect of weight loss: an update of the 1997 American Heart Association Scientific Statement on Obesity and Heart Disease from the Obesity Committee of the Council on Nutrition, Physical Activity, and Metabolism. *Circulation* **113**, 898-918.
3. Turin TC, Kita Y, Rumana N *et al.* (2010) Brachial-ankle pulse wave velocity predicts all-cause mortality in the general population: findings from the Takashima study, Japan. *Hypertens Res* **33**, 922-925.
4. Maeda Y, Inoguchi T, Etoh E *et al.* (2014) Brachial-ankle pulse wave velocity predicts all-cause mortality and cardiovascular events in patients with diabetes: the Kyushu Prevention Study of Atherosclerosis. *Diabetes Care* **37**, 2383-2390.
5. Ikura K, Hanai K, Oka S *et al.* (2016) Brachial-ankle pulse wave velocity, but not ankle-brachial index, predicts all-cause mortality in patients with diabetes after lower extremity amputation. *J Diabetes Investig.*
6. Izuohara M, Shioji K, Kadota S *et al.* (2008) Relationship of cardio-ankle vascular index (CAVI) to carotid and coronary arteriosclerosis. *Circ J* **72**, 1762-1767.
7. Okura T, Watanabe S, Kurata M *et al.* (2007) Relationship between cardio-ankle vascular index (CAVI) and carotid atherosclerosis in patients with essential hypertension. *Hypertens Res* **30**, 335-340.
8. Nakamura K, Tomaru T, Yamamura S *et al.* (2008) Cardio-ankle vascular index is a candidate predictor of coronary atherosclerosis. *Circ J* **72**, 598-604.
9. Satoh-Asahara N, Kotani K, Yamakage H *et al.* (2015) Cardio-ankle vascular index predicts for the incidence of cardiovascular events in obese patients: a multicenter prospective cohort study (Japan Obesity and Metabolic Syndrome Study: JOMS). *Atherosclerosis* **242**, 461-468.
10. Wohlfahrt P, Somers VK, Cifkova R *et al.* (2014) Relationship between measures of central and general adiposity with aortic stiffness in the general population. *Atherosclerosis* **235**, 625-631.
11. Wohlfahrt P, Krajcoviechova A, Seidlerova J *et al.* (2013) Lower-extremity arterial stiffness vs. aortic stiffness in the general population. *Hypertens Res* **36**, 718-724.
12. Moh MC, Sum CF, Lam BC *et al.* (2015) Evaluation of body adiposity index as a predictor of aortic stiffness in multi-ethnic Asian population with type 2 diabetes. *Diab Vasc Dis Res* **12**, 111-118.

- 1 13. Teoh WL, Price JF, Williamson RM *et al.* (2013) Metabolic parameters associated with arterial  
2 stiffness in older adults with Type 2 diabetes: the Edinburgh Type 2 diabetes study. *J Hypertens* **31**,  
3 1010-1017.
- 4 14. Hansen TW, Jeppesen J, Rasmussen S *et al.* (2004) Relation between insulin and aortic stiffness: a  
5 population-based study. *J Hum Hypertens* **18**, 1-7.
- 6 15. Rodrigues SL, Baldo MP, Lani L *et al.* (2012) Body mass index is not independently associated with  
7 increased aortic stiffness in a Brazilian population. *Am J Hypertens* **25**, 1064-1069.
- 8 16. Huisman HW, Schutte R, Venter HL *et al.* (2015) Low BMI is inversely associated with arterial  
9 stiffness in Africans. *Br J Nutr* **113**, 1621-1627.
- 10 17. Canepa M, AlGhatrif M, Pestelli G *et al.* (2014) Impact of central obesity on the estimation of  
11 carotid-femoral pulse wave velocity. *Am J Hypertens* **27**, 1209-1217.
- 12 18. Scuteri A, Orru M, Morrell CH *et al.* (2012) Associations of large artery structure and function with  
13 adiposity: effects of age, gender, and hypertension. The SardinIA Study. *Atherosclerosis* **221**, 189-  
14 197.
- 15 19. Johansen NB, Vistisen D, Brunner EJ *et al.* (2012) Determinants of aortic stiffness: 16-year follow-  
16 up of the Whitehall II study. *PLoS One* **7**, e37165.
- 17 20. Wildman RP, Mackey RH, Bostom A *et al.* (2003) Measures of obesity are associated with vascular  
18 stiffness in young and older adults. *Hypertension* **42**, 468-473.
- 19 21. Recio-Rodriguez JI, Gomez-Marcos MA, Patino-Alonso MC *et al.* (2012) Abdominal obesity vs  
20 general obesity for identifying arterial stiffness, subclinical atherosclerosis and wave reflection in  
21 healthy, diabetics and hypertensive. *BMC Cardiovasc Disord* **12**, 3.
- 22 22. Brunner EJ, Shipley MJ, Ahmadi-Abhari S *et al.* (2015) Adiposity, obesity, and arterial aging:  
23 longitudinal study of aortic stiffness in the Whitehall II cohort. *Hypertension* **66**, 294-300.
- 24 23. Marrugat J, Vila J, Baena-Diez JM *et al.* (2011) [Relative validity of the 10-year cardiovascular risk  
25 estimate in a population cohort of the REGICOR study]. *Rev Esp Cardiol* **64**, 385-394.
- 26 24. Marti R, Parramon D, Garcia-Ortiz L *et al.* (2011) Improving interMediate risk management.  
27 MARK study. *BMC Cardiovasc Disord* **11**, 61.
- 28 25. Marrugat J, D'Agostino R, Sullivan L *et al.* (2003) An adaptation of the Framingham coronary heart  
29 disease risk function to European Mediterranean areas. *J Epidemiol Community Health* **57**, 634-638.
- 30 26. Conroy RM, Pyorala K, Fitzgerald AP *et al.* (2003) Estimation of ten-year risk of fatal  
31 cardiovascular disease in Europe: the SCORE project. *Eur Heart J* **24**, 987-1003.
- 32 27. Mancia G, Fagard R, Narkiewicz K *et al.* (2013) 2013 ESH/ESC Guidelines for the management of  
33 arterial hypertension: the Task Force for the management of arterial hypertension of the European  
34 Society of Hypertension (ESH) and of the European Society of Cardiology (ESC). *J Hypertens* **31**, 1281-  
35 1357.
- 36 28. Salas-Salvado J, Rubio MA, Barbany M *et al.* (2007) [SEEDO 2007 Consensus for the evaluation of  
37 overweight and obesity and the establishment of therapeutic intervention criteria]. *Med Clin (Barc)*  
38 **128**, 184-196. .
- 39 29. Browning LM, Hsieh SD, Ashwell M (2010) A systematic review of waist-to-height ratio as a  
40 screening tool for the prediction of cardiovascular disease and diabetes: 0.5 could be a suitable  
41 global boundary value. *Nutr Res Rev* **23**, 247-269.
- 42 30. Oliveros E, Somers VK, Sochor O *et al.* (2014) The concept of normal weight obesity. *Prog*  
43 *Cardiovasc Dis* **56**, 426-433.
- 44 31. Gomez-Ambrosi J, Silva C, Catalan V *et al.* (2012) Clinical usefulness of a new equation for  
45 estimating body fat. *Diabetes Care* **35**, 383-388.
- 46 32. Thomas DM, Bredlau C, Bosy-Westphal A *et al.* (2013) Relationships between body roundness  
47 with body fat and visceral adipose tissue emerging from a new geometrical model. *Obesity (Silver*  
48 *Spring)* **21**, 2264-2271.
- 49 33. Satoh N, Shimatsu A, Kato Y *et al.* (2008) Evaluation of the cardio-ankle vascular index, a new  
50 indicator of arterial stiffness independent of blood pressure, in obesity and metabolic syndrome.  
51 *Hypertens Res* **31**, 1921-1930.

- 1  
2  
3 1 34. Shirai K, Utino J, Otsuka K *et al.* (2006) A novel blood pressure-independent arterial wall stiffness  
4 2 parameter; cardio-ankle vascular index (CAVI). *J Atheroscler Thromb* **13**, 101-107.
- 5 3 35. Shirai K, Hiruta N, Song M *et al.* (2011) Cardio-ankle vascular index (CAVI) as a novel indicator of  
6 4 arterial stiffness: theory, evidence and perspectives. *J Atheroscler Thromb* **18**, 924-938.
- 7 5 36. Yamashina A, Tomiyama H, Takeda K *et al.* (2002) Validity, reproducibility, and clinical significance  
8 6 of noninvasive brachial-ankle pulse wave velocity measurement. *Hypertens Res* **25**, 359-364.
- 9 7 37. Catapano AL, Reiner Z, De Backer G *et al.* (2011) ESC/EAS Guidelines for the management of  
10 8 dyslipidaemias The Task Force for the management of dyslipidaemias of the European Society of  
11 9 Cardiology (ESC) and the European Atherosclerosis Society (EAS). *Atherosclerosis* **217**, 3-46.
- 12 10 38. O'Brien E, Asmar R, Beilin L *et al.* (2005) Practice guidelines of the European Society of  
13 11 Hypertension for clinic, ambulatory and self blood pressure measurement. *J Hypertens* **23**, 697-701.
- 14 12 39. Taylor HL, Jacobs DR, Jr., Schucker B *et al.* (1978) A questionnaire for the assessment of leisure  
15 13 time physical activities. *J Chronic Dis* **31**, 741-755.
- 16 14 40. Elosua R, Marrugat J, Molina L *et al.* (1994) Validation of the Minnesota Leisure Time Physical  
17 15 Activity Questionnaire in Spanish men. The MARATHOM Investigators. *Am J Epidemiol* **139**, 1197-  
18 16 1209.
- 19 17 41. Elosua R, Garcia M, Aguilar A *et al.* (2000) Validation of the Minnesota Leisure Time Physical  
20 18 Activity Questionnaire In Spanish Women. Investigators of the MARATDON Group. *Med Sci Sports*  
21 19 *Exerc* **32**, 1431-1437.
- 22 20 42. Ainsworth BE, Haskell WL, Leon AS *et al.* (1993) Compendium of physical activities: classification  
23 21 of energy costs of human physical activities. *Med Sci Sports Exerc* **25**, 71-80.
- 24 22 43. Haskell WL, Lee IM, Pate RR *et al.* (2007) Physical activity and public health: updated  
25 23 recommendation for adults from the American College of Sports Medicine and the American Heart  
26 24 Association. *Circulation* **116**, 1081-1093.
- 27 25 44. (2013) World Medical Association Declaration of Helsinki: ethical principles for medical research  
28 26 involving human subjects. *JAMA* **310**, 2191-2194.
- 29 27 45. Choi SY, Oh BH, Bae Park J *et al.* (2013) Age-associated increase in arterial stiffness measured  
30 28 according to the cardio-ankle vascular index without blood pressure changes in healthy adults. *J*  
31 29 *Atheroscler Thromb* **20**, 911-923.
- 32 30 46. Tomiyama H, Yamashina A, Arai T *et al.* (2003) Influences of age and gender on results of  
33 31 noninvasive brachial-ankle pulse wave velocity measurement--a survey of 12517 subjects.  
34 32 *Atherosclerosis* **166**, 303-309.
- 35 33 47. Marlatt KL, Kelly AS, Steinberger J *et al.* (2013) The influence of gender on carotid artery  
36 34 compliance and distensibility in children and adults. *J Clin Ultrasound* **41**, 340-346.
- 37 35 48. Bartok CJ, Marini ME, Birch LL (2011) High body mass index percentile accurately reflects excess  
38 36 adiposity in white girls. *J Am Diet Assoc* **111**, 437-441.
- 39 37 49. Philip R, Alpert BS, Schwingshackl A *et al.* (2015) Inverse Relationship between Cardio-Ankle  
40 38 Vascular Index and Body Mass Index in Healthy Children. *J Pediatr* **167**, 361-365 e361.
- 41 39 50. Yeboah K, Antwi DA, Gyan B *et al.* (2016) Arterial stiffness in hypertensive and type 2 diabetes  
42 40 patients in Ghana: comparison of the cardio-ankle vascular index and central aortic techniques. *BMC*  
43 41 *Endocr Disord* **16**, 53.
- 44 42 51. Al-Daghri NM, Al-Attas OS, Wani K *et al.* (2015) Sensitivity of various adiposity indices in  
45 43 identifying cardiometabolic diseases in Arab adults. *Cardiovasc Diabetol* **14**, 101.
- 46 44 52. Gomez-Sanchez L, Garcia-Ortiz L, Patino-Alonso MC *et al.* (2016) Association of metabolic  
47 45 syndrome and its components with arterial stiffness in Caucasian subjects of the MARK study: a  
48 46 cross-sectional trial. *Cardiovasc Diabetol* **15**, 148.
- 49 47 53. Morigami H, Morioka T, Yamazaki Y *et al.* (2016) Visceral Adiposity is Preferentially Associated  
50 48 with Vascular Stiffness Rather than Thickness in Men with Type 2 Diabetes. *J Atheroscler Thromb* **23**,  
51 49 1067-1079.
- 52 50 54. Kawada T, Andou T, Fukumitsu M (2014) Relationship between cardio-ankle vascular index and  
53 51 components of metabolic syndrome in combination with sex and age. *Diabetes Metab Syndr* **8**, 242-  
54 52 244.

- 1  
2  
3 1 55. Zhou F, Zhang H, Yao W *et al.* (2014) Relationship between brachial-ankle pulse wave velocity and  
4 2 metabolic syndrome components in a Chinese population. *J Biomed Res* **28**, 262-268.  
5 3 56. Kim HL, Lee JM, Seo JB *et al.* (2015) The effects of metabolic syndrome and its components on  
6 4 arterial stiffness in relation to gender. *J Cardiol* **65**, 243-249.  
7 5 57. Weng C, Yuan H, Yang K *et al.* (2013) Gender-specific association between the metabolic  
8 6 syndrome and arterial stiffness in 8,300 subjects. *Am J Med Sci* **346**, 289-294.  
9 7 58. Strasser B, Arvandi M, Pasha EP *et al.* (2015) Abdominal obesity is associated with arterial  
10 8 stiffness in middle-aged adults. *Nutr Metab Cardiovasc Dis* **25**, 495-502.  
11 9 59. Danias PG, Tritos NA, Stuber M *et al.* (2003) Comparison of aortic elasticity determined by  
12 10 cardiovascular magnetic resonance imaging in obese versus lean adults. *Am J Cardiol* **91**, 195-199.  
13 11 60. Takaki A, Ogawa H, Wakeyama T *et al.* (2008) Cardio-ankle vascular index is superior to brachial-  
14 12 ankle pulse wave velocity as an index of arterial stiffness. *Hypertens Res* **31**, 1347-1355.  
15 13 61. Shirai K (2011) Analysis of vascular function using the cardio-ankle vascular index (CAVI).  
16 14 *Hypertens Res* **34**, 684-685.  
17 15 62. Kubozono T, Miyata M, Ueyama K *et al.* (2007) Clinical significance and reproducibility of new  
18 16 arterial distensibility index. *Circ J* **71**, 89-94.  
19 17 63. Nagayama D, Endo K, Ohira M *et al.* (2013) Effects of body weight reduction on cardio-ankle  
20 18 vascular index (CAVI). *Obes Res Clin Pract* **7**, e139-e145.  
21  
22  
23  
24  
25  
26  
27  
28  
29  
30  
31  
32  
33  
34  
35  
36  
37  
38  
39  
40  
41  
42  
43  
44  
45  
46  
47  
48  
49  
50  
51  
52  
53  
54  
55  
56  
57  
58  
59  
60

1

2

**Table 1 General characteristics of all the sample and by gender.**

| Variables                         | Global (n=2354) | Males (n=1456) | Females (n=898) | p Value |
|-----------------------------------|-----------------|----------------|-----------------|---------|
| Age (years)                       | 61.4±7.7        | 61.1±8.1       | 61.8±7.0        | 0.030   |
| Smoking n (%)                     | 658 (28.0)      | 456 (31.5)     | 202 (22.7)      | <0.001  |
| Alcohol (gr/week)                 | 72.2±117.5      | 102.2±133.3    | 23.6±59.9       | <0.001  |
| Physical activity (METs/min/week) | 2481±2512       | 2886±1831      | 1825±1691       | <0.001  |
| Sedentary n (%)                   | 1020 (43.3)     | 538 (37.0)     | 482 (53.7)      | <0.001  |
| Height (cm)                       | 165±9           | 170±7          | 156±6           | <0.001  |
| Weight (kg)                       | 79.4±14.6       | 83.9±13.4      | 72.2±13.3       | <0.001  |
| BMI (kg/m <sup>2</sup> )          | 29.2±4.4        | 29.1±3.9       | 29.5±5.1        | 0.035   |
| BMI ≥ 30 n (%)                    | 847 (36.0)      | 485 (33.4)     | 362 (40.4)      | 0.001   |
| Waist circumference (cm)          | 100.9±11.6      | 102.9±10.5     | 97.6±12.5       | <0.001  |
| WHtR                              | 0.61±0.07       | 0.61±0.06      | 0.62±0.08       | <0.001  |
| CUN-BAE                           | 35.7±1.7        | 31.1±4.5       | 43.1±5.1        | <0.001  |
| BRI                               | 5.8±1.7         | 5.7±1.5        | 6.1±2.1         | <0.001  |
| SBP (mmHg)                        | 137.1±17.4      | 138.9±17.1     | 134.2±17.5      | <0.001  |
| DBP (mmHg)                        | 84.4±10.2       | 85.5±10.4      | 82.7±9.7        | <0.001  |
| Heart rate (beats minutes)        | 74.2±10.2       | 73.3±12.7      | 75.8±11.6       | <0.001  |
| Hypertension n (%)                | 1712 (72.7)     | 1122 (80.1)    | 590 (75.4)      | <0.001  |
| Antihypertensive drugs n (%)      | 1199 (50.9)     | 729 (50.2)     | 470 (52.6)      | 0.289   |
| Total Cholesterol (mg/dl)         | 225.8±40.9      | 220.8±39.1     | 233.9±42.5      | <0.001  |
| LDL Cholesterol (mg/dl)           | 140.4±34.9      | 138.9±34.2     | 142.8±35.8      | 0.011   |
| HDL Cholesterol (mg/dl)           | 49.8±12.9       | 47.9±11.9      | 52.9±13.8       | <0.001  |
| Triglycerides (mg/dl)             | 145.5±96.6      | 150.3±106.3    | 137.7±77.9      | 0.001   |
| Atherogenic index                 | 4.8±1.3         | 4.8±1.3        | 4.7±1.3         | 0.002   |
| Dyslipidemia n (%)                | 2151 (91.4)     | 1311 (90.0)    | 840 (93.5)      | <0.001  |
| Lipid lowering drugs n (%)        | 671 (28.5)      | 392 (26.8)     | 279 (31.0)      | 0.034   |
| FPG (mg/dl)                       | 107.2±34.8      | 106.9±33.9     | 107.6±36.1      | 0.659   |
| HbA1c                             | 4.8±1.3         | 5.9±1.4        | 6.1±1.4         | 0.001   |
| Diabetes n (%)                    | 791 (33.6)      | 463 (31.8)     | 328 (36.5)      | 0.020   |
| Antidiabetic drugs n (%)          | 474 (20.1)      | 269 (18.5)     | 205 (22.9)      | 0.011   |
| CAVI                              | 8.8±1.2         | 8.9±1.2        | 8.6±1.1         | <0.001  |
| baPWV (m/s)                       | 14.9±2.5        | 14.8±2.5       | 15.0±2.6        | 0.107   |

3 Values are means and (standard deviations) for continuous data and number and (proportions) for  
4 categorical data.

5 Abbreviations: METs-min/week, metabolic equivalent minutes per week. BMI, body mass index.  
6 WHtR, waist-to-height ratio. CUN-BAE, University clinic of Navarra - body adiposity estimator. BRI,  
7 body roundness index. SBP, systolic blood pressure. DBP, diastolic blood pressure. LDL, low density  
8 lipoprotein. HDL, high density lipoprotein. FPG, fasting plasma glucose. HbA1c, glycosylated  
9 hemoglobin. CAVI, cardio ankle vascular index. baPWV, braquial-ankle pulse wave velocity.

10 p value differences between male and females

11

1 **Table 2: Bivariate correlations of adiposity measures with CAVI and baPWV.**

|                | CAVI       |                       | baPWV      |                       |
|----------------|------------|-----------------------|------------|-----------------------|
|                | Unadjusted | Adjusted <sup>a</sup> | Unadjusted | Adjusted <sup>a</sup> |
| <b>BMI</b>     | -0.264**   | -0.303**              | -0.035     | -0.068**              |
| <b>WHtR</b>    | -0.119**   | -0.222**              | 0.090**    | 0.001                 |
| <b>CUN-BAE</b> | -0.187**   | -0.297**              | 0.054*     | -0.063**              |
| <b>BRI</b>     | -0.125**   | -0.218**              | 0.078**    | 0.005                 |

2 Abbreviations: CAVI, cardio-ankle vascular index. baPWV, brachial-ankle pulse wave velocity. BMI,  
3 body mass index. WHtR, waist-to-height ratio. CUN-BAE, University clinic of Navarra - body  
4 adiposity estimator. BRI, body roundness index.

5 <sup>a</sup> Adjusted for age, sex and systolic blood pressure.  
6 p-values by Pearson correlation.\* p<0.05, \*\* p< 0.01.  
7

For peer review only



1  
2  
3 **Table 3: Multiple regression analysis: association between adiposity measures with CAVI and**  
4 **baPWV.**

|                | <b>R<sup>2</sup></b> | <b>β(95%CI)</b>           | <b>Partial R<sup>2</sup></b> | <b>p value</b> |
|----------------|----------------------|---------------------------|------------------------------|----------------|
| <b>CAVI</b>    |                      |                           |                              |                |
| <b>BMI</b>     | 0.412                | -0.075 (-0.083 to -0.066) | 0.055                        | <0.001         |
| <b>WHtR</b>    | 0.381                | -3.650 (-4.207 to -3.093) | 0.038                        | <0.001         |
| <b>CUN-BAE</b> | 0.410                | -0.069 (-0.077 to -0.061) | 0.058                        | <0.001         |
| <b>BRI</b>     | 0.378                | -0.142 (-0.165 to -0.120) | 0.037                        | <0.001         |
| <b>baPWV</b>   |                      |                           |                              |                |
| <b>BMI</b>     | 0.402                | -0.057 (-0.076 to -0.038) | 0.007                        | <0.001         |
| <b>WHtR</b>    | 0.394                | -1.557 (-2.748 to -0.366) | 0.001                        | 0.021          |
| <b>CUN-BAE</b> | 0.401                | -0.050 (-0.068 to -0.033) | 0.007                        | <0.001         |
| <b>BRI</b>     | 0.394                | -0.066 (-0.115 to -0.018) | 0.002                        | 0.014          |

3 Four different multiple linear regression models were used to analyze the associations of adiposity  
4 measures with CAVI and baPWV.

5 Adjusted for age (years), gender (0=male and 1=female), systolic blood pressure, smoking (0=No and  
6 1=Yes), METs/min/week, atherogenic index, HbA1c and METs/min/week.

7 Abbreviations: METs-min/week, metabolic equivalent minutes per week. CAVI, cardio-ankle vascular  
8 index. baPWV, brachial-ankle pulse wave velocity. BMI, body mass index. WHtR, waist-to-height  
9 ratio. CUN-BAE, University clinic of Navarra - body adiposity estimator. BRI, body roundness index.  
10 METs-min/week, metabolic equivalent minutes per week.

11  
12  
13  
14

1 **Table 4: Association between adiposity measures with CAVI in different groups.**

|                         | <b>R<sup>2</sup></b> | <b>β(95%CI)</b>           | <b>Partial R<sup>2</sup></b> | <b>p value</b> |
|-------------------------|----------------------|---------------------------|------------------------------|----------------|
|                         | <b>CAVI</b>          |                           |                              |                |
| <b>Hypertensive</b>     |                      |                           |                              |                |
| <b>BMI</b>              | 0.409                | -0.076 (-0.087 to -0.065) | 0.023                        | <0.001         |
| <b>WHtR</b>             | 0.383                | -3.838 (-4.527 to -3.148) | 0.035                        | <0.001         |
| <b>CUN-BAE</b>          | 0.368                | -0.068 (-0.078 to -0.058) | 0.051                        | <0.001         |
| <b>BRI</b>              | 0.382                | -0.165 (-0.193 to -0.137) | 0.035                        | <0.001         |
| <b>Non hypertensive</b> |                      |                           |                              |                |
| <b>BMI</b>              | 0.372                | -0.071 (-0.086 to -0.057) | 0.052                        | <0.001         |
| <b>WHtR</b>             | 0.324                | -2.939 (-3.850 to -2.028) | 0.046                        | <0.001         |
| <b>CUN-BAE</b>          | 0.405                | -0.065 (-0.080 to -0.052) | 0.080                        | <0.001         |
| <b>BRI</b>              | 0.318                | -0.108 (-0.144 to -0.072) | 0.042                        | <0.001         |
| <b>Diabetics</b>        |                      |                           |                              |                |
| <b>BMI</b>              | 0.439                | -0.087 (-0.101 to -0.073) | 0.95                         | <0.001         |
| <b>WHtR</b>             | 0.399                | -4.613 (-5.523 to -3.702) | 0.069                        | <0.001         |
| <b>CUN-BAE</b>          | 0.437                | -0.083 (-0.096 to -0.070) | 0.70                         | <0.001         |
| <b>BRI</b>              | 0.391                | -0.169 (-0.205 to -0.134) | 0.062                        | <0.001         |
| <b>Non diabetics</b>    |                      |                           |                              |                |
| <b>BMI</b>              | 0.396                | -0.067 (-0.078 to -0.056) | 0.049                        | <0.001         |
| <b>WHtR</b>             | 0.369                | -3.088 (-3.781 to -2.396) | 0.034                        | <0.001         |
| <b>CUN-BAE</b>          | 0.395                | -0.059 (-0.069 to -0.050) | 0.064                        | <0.001         |
| <b>BRI</b>              | 0.369                | -0.130 (-0.159 to -0.099) | 0.034                        | 0.016          |
| <b>Obese</b>            |                      |                           |                              |                |
| <b>BMI</b>              | 0.414                | -0.093 (-0.112 to -0.074) | 0.054                        | <0.001         |
| <b>WHtR</b>             | 0.377                | -2.945 (-4.085 to -1.804) | 0.003                        | <0.001         |
| <b>CUN-BAE</b>          | 0.418                | -0.100 (-0.122 to -0.079) | 0.026                        | <0.001         |
| <b>BRI</b>              | 0.377                | -0.110 (-0.153 to -0.069) | 0.003                        | <0.001         |
| <b>Non obese</b>        |                      |                           |                              |                |
| <b>BMI</b>              | 0.373                | -0.058 (-0.078 to -0.038) | 0.013                        | <0.001         |
| <b>WHtR</b>             | 0.361                | -1.394 (-2.366 to -0.421) | 0.003                        | 0.005          |
| <b>CUN-BAE</b>          | 0.373                | -0.050 (-0.066 to -0.033) | 0.020                        | <0.001         |
| <b>BRI</b>              | 0.358                | -0.044 (-0.085 to -0.003) | 0.002                        | 0.034          |
| <b>≤ 62 years</b>       |                      |                           |                              |                |
| <b>BMI</b>              | 0.368                | -0.078 (-0.089 to -0.077) | 0.77                         | 0.003          |
| <b>WHtR</b>             | 0.332                | -4.142 (-4.854 to -3.431) | 0.065                        | <0.001         |
| <b>CUN-BAE</b>          | 0.361                | -0.068 (-0.078 to -0.058) | 0.070                        | <0.001         |
| <b>BRI</b>              | 0.324                | -0.163 (-0.192 to -0.134) | 0.062                        | <0.001         |
| <b>&gt; 62 years</b>    |                      |                           |                              |                |
| <b>BMI</b>              | 0.234                | -0.074 (-0.088 to -0.060) | 0.056                        | <0.001         |
| <b>WHtR</b>             | 0.195                | -3.086 (-3.948 to -2.224) | 0.029                        | <0.001         |
| <b>CUN-BAE</b>          | 0.234                | -0.071 (-0.084 to -0.059) | 0.065                        | <0.001         |
| <b>BRI</b>              | 0.193                | -0.124 (-0.159 to -0.089) | 0.028                        | <0.001         |
| <b>Assets</b>           |                      |                           |                              |                |
| <b>BMI</b>              | 0.414                | -0.072 (-0.084 to -0.060) | 0.053                        | <0.001         |
| <b>WHtR</b>             | 0.392                | -3.570 (-4.335 to -2.805) | 0.034                        | <0.001         |
| <b>CUN-BAE</b>          | 0.413                | -0.066 (-0.075 to -0.053) | 0.060                        | <0.001         |
| <b>BRI</b>              | 0.391                | -0.148 (-0.180 to -0.116) | 0.034                        | <0.001         |
| <b>Sedentary</b>        |                      |                           |                              |                |
| <b>BMI</b>              | 0.408                | -0.080 (-0.092 to -0.068) | 0.055                        | <0.001         |
| <b>WHtR</b>             | 0.364                | -3.776 (-4.598 to -2.954) | 0.045                        | <0.001         |
| <b>CUN-BAE</b>          | 0.404                | -0.074 (-0.086 to -0.062) | 0.059                        | <0.001         |
| <b>BRI</b>              | 0.360                | -0.144 (-0.176 to -0.111) | 0.043                        | <0.001         |

2 Multiple linear regression models were used to analyze the associations of adiposity measures with CAVI by  
3 groups.

4 Adjusted for age (years), gender (0=male and 1=female), Systolic blood pressure, smoking (0=No and 1=Yes),  
5 METs/min/week, atherogenic index, HbA1c and METs/min/week.

1  
2  
3  
4  
5  
6  
7  
8  
9  
10  
11  
12  
13  
14  
15  
16  
17  
18  
19  
20  
21  
22  
23  
24  
25  
26  
27  
28  
29  
30  
31  
32  
33  
34  
35  
36  
37  
38  
39  
40  
41  
42  
43  
44  
45  
46  
47  
48  
49  
50  
51  
52  
53  
54  
55  
56  
57  
58  
59  
60

1 Abbreviations: METs-min/week, metabolic equivalent minutes per week. CAVI, cardio-ankle vascular  
2 index. BMI, body mass index. WHtR, waist-to-height ratio. CUN-BAE, University clinic of Navarra - body  
3 adiposity estimator. BRI, body roundness index.  
4

For peer review only

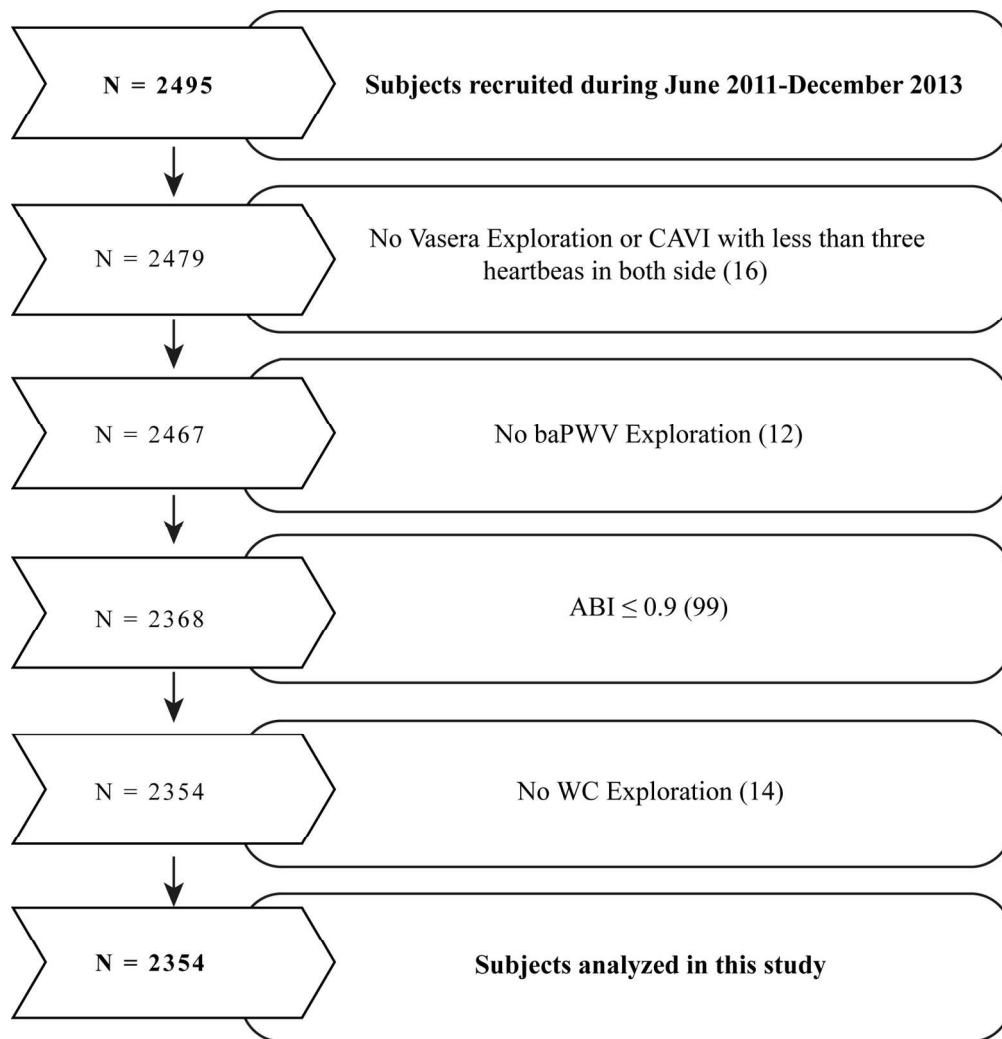

Figure 1. Flow chart of this MARK substudy  
 Abbreviations: N, number; CAVI, cardio-ankle vascular index; baPWV, brachial-ankle pulse wave velocity; ABI, ankle-brachial index; WC, waist circumference

145x149mm (300 x 300 DPI)

(a)

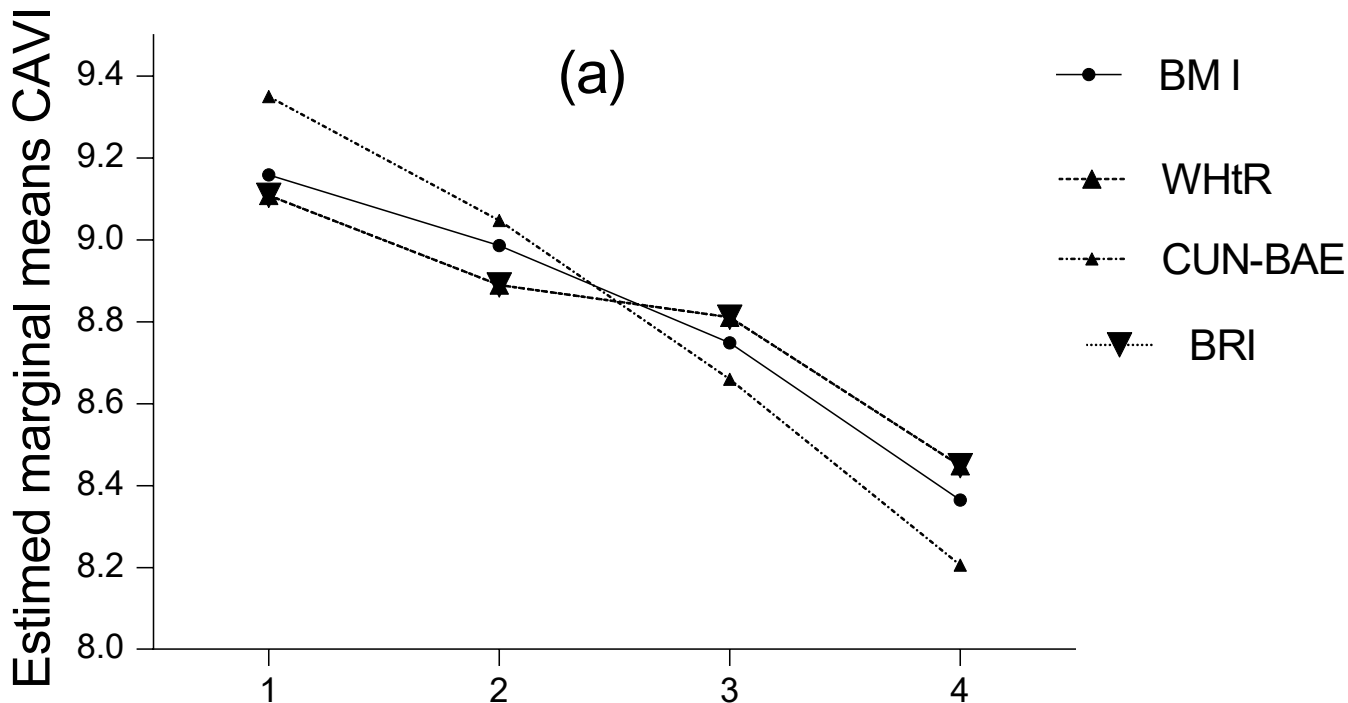

(b)

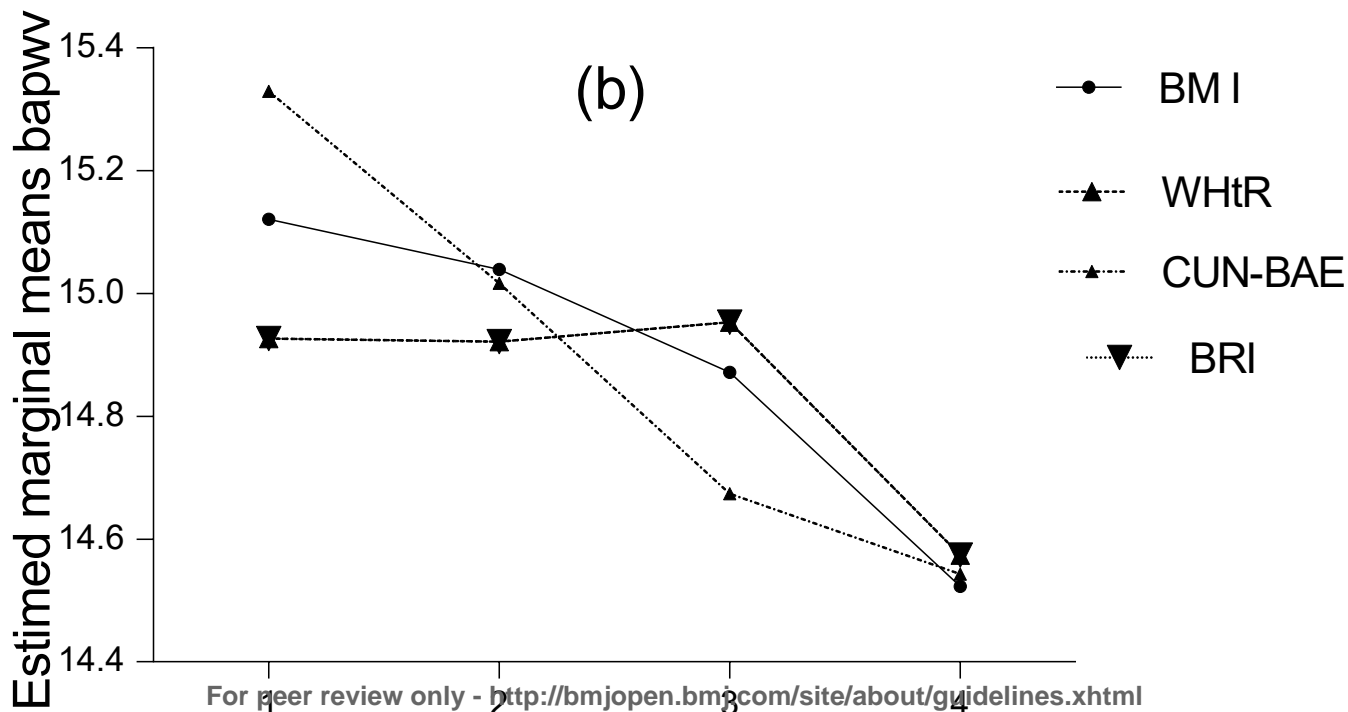

## STROBE Statement—checklist of items that should be included in reports of observational studies

|                              | Item No | Recommendation                                                                                                                                                                                                                                                                                                                                                                                                                                                                                                                                                                                                                                                                                                                               |
|------------------------------|---------|----------------------------------------------------------------------------------------------------------------------------------------------------------------------------------------------------------------------------------------------------------------------------------------------------------------------------------------------------------------------------------------------------------------------------------------------------------------------------------------------------------------------------------------------------------------------------------------------------------------------------------------------------------------------------------------------------------------------------------------------|
| <b>Title and abstract</b>    | 1       | (a) Indicate the study's design with a commonly used term in the title or the abstract<br><b>Yes, Page 1</b><br>(b) Provide in the abstract an informative and balanced summary of what was done and what was found<br><b>Yes, Page 2</b>                                                                                                                                                                                                                                                                                                                                                                                                                                                                                                    |
| <b>Introduction</b>          |         |                                                                                                                                                                                                                                                                                                                                                                                                                                                                                                                                                                                                                                                                                                                                              |
| Background/rationale         | 2       | Explain the scientific background and rationale for the investigation being reported<br><b>Yes, Page 4</b>                                                                                                                                                                                                                                                                                                                                                                                                                                                                                                                                                                                                                                   |
| Objectives                   | 3       | State specific objectives, including any prespecified hypotheses<br><b>Yes, Page 4</b>                                                                                                                                                                                                                                                                                                                                                                                                                                                                                                                                                                                                                                                       |
| <b>Methods</b>               |         |                                                                                                                                                                                                                                                                                                                                                                                                                                                                                                                                                                                                                                                                                                                                              |
| Study design                 | 4       | Present key elements of study design early in the paper<br><b>Yes, Page 5</b>                                                                                                                                                                                                                                                                                                                                                                                                                                                                                                                                                                                                                                                                |
| Setting                      | 5       | Describe the setting, locations, and relevant dates, including periods of recruitment, exposure, follow-up, and data collection<br><b>Yes, Page 5</b>                                                                                                                                                                                                                                                                                                                                                                                                                                                                                                                                                                                        |
| Participants                 | 6       | (a) <i>Cohort study</i> —Give the eligibility criteria, and the sources and methods of selection of participants. Describe methods of follow-up<br><i>Case-control study</i> —Give the eligibility criteria, and the sources and methods of case ascertainment and control selection. Give the rationale for the choice of cases and controls<br><i>Cross-sectional study</i> —Give the eligibility criteria, and the sources and methods of selection of participants<br><b>Yes, Page 5</b><br>(b) <i>Cohort study</i> —For matched studies, give matching criteria and number of exposed and unexposed<br><i>Case-control study</i> —For matched studies, give matching criteria and the number of controls per case<br><b>Yes, Page 5</b> |
| Variables                    | 7       | Clearly define all outcomes, exposures, predictors, potential confounders, and effect modifiers. Give diagnostic criteria, if applicable<br><b>Yes, Page 6</b>                                                                                                                                                                                                                                                                                                                                                                                                                                                                                                                                                                               |
| Data sources/<br>measurement | 8*      | For each variable of interest, give sources of data and details of methods of assessment (measurement). Describe comparability of assessment methods if there is more than one group<br><b>Yes, Page 6-9</b>                                                                                                                                                                                                                                                                                                                                                                                                                                                                                                                                 |
| Bias                         | 9       | Describe any efforts to address potential sources of bias<br><b>Yes, Page 8-9</b>                                                                                                                                                                                                                                                                                                                                                                                                                                                                                                                                                                                                                                                            |
| Study size                   | 10      | Explain how the study size was arrived at<br><b>Yes, Page 5</b>                                                                                                                                                                                                                                                                                                                                                                                                                                                                                                                                                                                                                                                                              |
| Quantitative variables       | 11      | Explain how quantitative variables were handled in the analyses. If applicable, describe which groupings were chosen and why<br><b>Yes, Page 8-9</b>                                                                                                                                                                                                                                                                                                                                                                                                                                                                                                                                                                                         |

1  
2 Statistical methods

12

(a) Describe all statistical methods, including those used to control for confounding

**Yes, Page 8-9**

---

(b) Describe any methods used to examine subgroups and interactions **Yes, Page 8-9**

---

(c) Explain how missing data were addressed **Yes, Page 8-9**

---

(d) *Cohort study*—If applicable, explain how loss to follow-up was addressed*Case-control study*—If applicable, explain how matching of cases and controls was addressed*Cross-sectional study*—If applicable, describe analytical methods taking account of sampling strategy

---

(e) Describe any sensitivity analyses **Yes, Page 8-9**

Continued on next page

For peer review only

**Results**

|                  |     |                                                                                                                                                                                                                                                                                                                                                                                                                                                     |
|------------------|-----|-----------------------------------------------------------------------------------------------------------------------------------------------------------------------------------------------------------------------------------------------------------------------------------------------------------------------------------------------------------------------------------------------------------------------------------------------------|
| Participants     | 13* | (a) Report numbers of individuals at each stage of study—eg numbers potentially eligible, examined for eligibility, confirmed eligible, included in the study, completing follow-up, and analysed <b>Yes, Page 10-11</b><br>(b) Give reasons for non-participation at each stage <b>Yes, Page 10-11</b><br>(c) Consider use of a flow diagram <b>Yes, Figure 1</b>                                                                                  |
| Descriptive data | 14* | (a) Give characteristics of study participants (eg demographic, clinical, social) and information on exposures and potential confounders <b>Yes, Page 10</b><br>(b) Indicate number of participants with missing data for each variable of interest <b>Yes, Page 10</b><br>(c) <i>Cohort study</i> —Summarise follow-up time (eg, average and total amount)                                                                                         |
| Outcome data     | 15* | <i>Cohort study</i> —Report numbers of outcome events or summary measures over time<br><i>Case-control study</i> —Report numbers in each exposure category, or summary measures of exposure<br><i>Cross-sectional study</i> —Report numbers of outcome events or summary measures                                                                                                                                                                   |
| Main results     | 16  | (a) Give unadjusted estimates and, if applicable, confounder-adjusted estimates and their precision (eg, 95% confidence interval). Make clear which confounders were adjusted for and why they were included <b>Yes, Tables</b><br>(b) Report category boundaries when continuous variables were categorized <b>Yes, tables</b><br>(c) If relevant, consider translating estimates of relative risk into absolute risk for a meaningful time period |
| Other analyses   | 17  | Report other analyses done—eg analyses of subgroups and interactions, and sensitivity analyses <b>Yes, Page 10</b>                                                                                                                                                                                                                                                                                                                                  |

**Discussion**

|                  |    |                                                                                                                                                                                                   |
|------------------|----|---------------------------------------------------------------------------------------------------------------------------------------------------------------------------------------------------|
| Key results      | 18 | Summarise key results with reference to study objectives <b>Yes, Page 11</b>                                                                                                                      |
| Limitations      | 19 | Discuss limitations of the study, taking into account sources of potential bias or imprecision. Discuss both direction and magnitude of any potential bias <b>Yes, Page 11</b>                    |
| Interpretation   | 20 | Give a cautious overall interpretation of results considering objectives, limitations, multiplicity of analyses, results from similar studies, and other relevant evidence <b>Yes, Page 11-13</b> |
| Generalisability | 21 | Discuss the generalisability (external validity) of the study results <b>Yes, Page 11</b>                                                                                                         |

**Other information**

|         |    |                                                                                                                                                                                   |
|---------|----|-----------------------------------------------------------------------------------------------------------------------------------------------------------------------------------|
| Funding | 22 | Give the source of funding and the role of the funders for the present study and, if applicable, for the original study on which the present article is based <b>Yes, Page 15</b> |
|---------|----|-----------------------------------------------------------------------------------------------------------------------------------------------------------------------------------|

\*Give information separately for cases and controls in case-control studies and, if applicable, for exposed and unexposed groups in cohort and cross-sectional studies.

**Note:** An Explanation and Elaboration article discusses each checklist item and gives methodological background and published examples of transparent reporting. The STROBE checklist is best used in conjunction with this article (freely available on the Web sites of PLoS Medicine at <http://www.plosmedicine.org/>, Annals of Internal Medicine at <http://www.annals.org/>, and Epidemiology at <http://www.epidem.com/>). Information on the STROBE Initiative is available at [www.strobe-statement.org](http://www.strobe-statement.org).



# BMJ Open

## Adiposity measures and arterial stiffness in primary care: the MARK prospective observational study

|                                 |                                                                                                                                                                                                                                                                                                                                                                                                                                                                                                                                                                                                                                                                                                                                                                                                                                                                                                                                                                                                                                                                                                                                                                                                                                                                                                                                                                                                                                                                                    |
|---------------------------------|------------------------------------------------------------------------------------------------------------------------------------------------------------------------------------------------------------------------------------------------------------------------------------------------------------------------------------------------------------------------------------------------------------------------------------------------------------------------------------------------------------------------------------------------------------------------------------------------------------------------------------------------------------------------------------------------------------------------------------------------------------------------------------------------------------------------------------------------------------------------------------------------------------------------------------------------------------------------------------------------------------------------------------------------------------------------------------------------------------------------------------------------------------------------------------------------------------------------------------------------------------------------------------------------------------------------------------------------------------------------------------------------------------------------------------------------------------------------------------|
| Journal:                        | <i>BMJ Open</i>                                                                                                                                                                                                                                                                                                                                                                                                                                                                                                                                                                                                                                                                                                                                                                                                                                                                                                                                                                                                                                                                                                                                                                                                                                                                                                                                                                                                                                                                    |
| Manuscript ID                   | bmjopen-2017-016422.R2                                                                                                                                                                                                                                                                                                                                                                                                                                                                                                                                                                                                                                                                                                                                                                                                                                                                                                                                                                                                                                                                                                                                                                                                                                                                                                                                                                                                                                                             |
| Article Type:                   | Research                                                                                                                                                                                                                                                                                                                                                                                                                                                                                                                                                                                                                                                                                                                                                                                                                                                                                                                                                                                                                                                                                                                                                                                                                                                                                                                                                                                                                                                                           |
| Date Submitted by the Author:   | 22-Jun-2017                                                                                                                                                                                                                                                                                                                                                                                                                                                                                                                                                                                                                                                                                                                                                                                                                                                                                                                                                                                                                                                                                                                                                                                                                                                                                                                                                                                                                                                                        |
| Complete List of Authors:       | Gomez-Sanchez, Leticia; La Alamedilla health centre., Primary Care Research Unit; 2. Biomedical Research Institute of Salamanca (IBSAL) Garcia-Ortiz, Luis; La Alamedilla health centre. University of Salamanca, Primary care research unit La Alamedilla<br>Patino-Alonso, Maria; University of Salamanca, Salamanca, Spain , Statistics Department,<br>Recio-Rodriguez, Jose; La Alamedilla Health Center, Primary Care Research Unit, The Alamedilla Health Center, Castilla and León Health Service (SACYL), Biomedical Research Institute of Salamanca (IBSAL)<br>Frigo, Fernando<br>Marti, Rhut; Institut Universitari d'Investigació en Atenció Primària Jordi Gol (IDIAP Jordi Gol), Unitat de Suport a la Recerca de Girona.<br>Agudo-Conde, Cristina; La Alamedilla Health Center,, Research Unit<br>Rodriguez-Sanchez, Emiliano; Primary Care Research Unit, The Alamedilla Health Center, Salamanca, Spain, ; Biomedical Research Institute of Salamanca (IBSAL),<br>Maderuelo-Fernandez, Jose; Salamanca Institute for Biomedical Research. (IBSAL)., Primary care research unit La Alamedilla, Castilla and León Health Service (SACYL). Network of Preventive Activities and Health Promotion in Primary Care (REDIAPP)<br>Ramos, Rafel; Universidad de Girona. Departament Medicina<br>Gomez-Marcos, Manuel; the Alamedilla Health Center, Castilla and León Health Service (SACYL), Primary Care Research Unit; University of Salamanca,, Department of Medicine |
| <b>Primary Subject Heading</b>: | Cardiovascular medicine                                                                                                                                                                                                                                                                                                                                                                                                                                                                                                                                                                                                                                                                                                                                                                                                                                                                                                                                                                                                                                                                                                                                                                                                                                                                                                                                                                                                                                                            |
| Secondary Subject Heading:      | Diabetes and endocrinology, Epidemiology, Nutrition and metabolism                                                                                                                                                                                                                                                                                                                                                                                                                                                                                                                                                                                                                                                                                                                                                                                                                                                                                                                                                                                                                                                                                                                                                                                                                                                                                                                                                                                                                 |
| Keywords:                       | Body mass index, Waist circumference, Waist-to-height ratio, Fat mass percent., Body roundness index., Arterial stiffness                                                                                                                                                                                                                                                                                                                                                                                                                                                                                                                                                                                                                                                                                                                                                                                                                                                                                                                                                                                                                                                                                                                                                                                                                                                                                                                                                          |
|                                 |                                                                                                                                                                                                                                                                                                                                                                                                                                                                                                                                                                                                                                                                                                                                                                                                                                                                                                                                                                                                                                                                                                                                                                                                                                                                                                                                                                                                                                                                                    |

SCHOLARONE™  
Manuscripts

1  
2  
3 1 **Title: Adiposity measures and arterial stiffness in primary care: the MARK prospective**  
4 **observational study**

5  
6 3 **Authors:** Leticia Gomez-Sanchez MD <sup>1,2\*</sup>, Luis Garcia-Ortiz MD, PhD <sup>1,2,3</sup>, Maria C Patino-  
7  
8 4 Alonso PhD <sup>1,2,4</sup>, Jose I Recio-Rodriguez PhD <sup>1,2,5</sup>, Fernando Frigo MD, PhD <sup>6</sup>, Rhut Martí  
9  
10 5 PhD <sup>7,8</sup>, Cristina Agudo-Conde <sup>1,2</sup>, Emiliano Rodriguez-Sanchez MD, PhD <sup>1,2,9</sup>, Jose A  
11  
12 6 Maderuelo-Fernandez MD, PhD <sup>1,2</sup>, Rafel Ramos MD, PhD <sup>7,8,10</sup> and Manuel A Gomez-  
13  
14 7 Marcos MD, PhD <sup>1,2,9</sup> for the MARK Group <sup>11</sup>

15  
16 8 1. Primary Care Research Unit, the Alamedilla Health Center, Castilla and León Health  
17  
18 9 Service (SACyL), Salamanca, Spain

19  
20 10 2. Biomedical Research Institute of Salamanca (IBSAL), Salamanca, Spain

21  
22 11 3. Biomedical and diagnostic sciences department, University of Salamanca, Salamanca,  
23  
24 12 Spain

25  
26 13 4. Statistics Department, University of Salamanca, Salamanca, Spain

27  
28 14 5. Department of Nursing and Physiotherapy, University of Salamanca, Salamanca, Spain

29  
30 15 6. San Agustín Health Center, Illes Balears Health Service (IBSALUT), Palma of Mallorca,  
31  
32 16 Spain

33  
34 17 7. Unitat de Suport a la Recerca de Girona. Institut Universitari d'Investigació en Atenció  
35  
36 18 Primària Jordi Gol (IDIAP Jordi Gol), Girona, Spain

37  
38 19 8. Institut d'Investigació Biomèdica of Girona Dr. Josep Trueta (IDBGI). Girona, Spain

39  
40 20 9. Department of Medicine, University of Salamanca, Salamanca, Spain

41  
42 21 10. Departament de Ciències Mèdiques, Facultat de Medicina. Universitat de Girona, Spain.

43  
44 22 11. MARK Group. redIAPP: Research Network in Preventive Activities and Health  
45  
46 23 Promotion, Girona, Spain

47  
48 24 **\*Corresponding Author:**

49  
50 25 Leticia Gomez-Sanchez, Primary Care Research Unit, Alamedilla Health Care Center

51  
52 26 37003 Salamanca, Spain

53  
54 27 E-mail addresses: leticiagmzsnchz@gmail.com

55  
56 28 Full list of author information is available at the end of the article.

57  
58 29

1  
2  
3 **1 ABSTRACT**

4  
5 **2 Background:** The cardiovascular risk in obesity is potentially increased by arterial stiffness.

6  
7 **3 Objective:** This study investigates the relationship of adiposity measures with arterial  
8  
9  
10 stiffness in Caucasian adults with intermediate cardiovascular risk.

11 **5 Setting:** Six primary care centers in three Spanish Autonomous Communities, Spain

12  
13 **6 Participants:** This study analyzed 2354 subjects (age range, 35–74 years; mean age, 61.4±7.7  
14  
15  
16 years, 61.9% male).

17  
18 **8 Methods:** The study was based on cross-sectional data from the MARK study. The main  
19  
20  
21  
22  
23  
24  
25  
26  
27  
28  
29  
30  
31  
32  
33  
34  
35  
36  
37  
38  
39  
40  
41  
42  
43  
44  
45  
46  
47  
48  
49  
50  
51  
52  
53  
54  
55  
56  
57  
58  
59  
60  
outcome variables were: body mass index (BMI), waist-to-height ratio (WHtR), Clínica  
Universidad de Navarra-body adiposity estimation (CUN-BAE) body fat percentage, and  
body roundness index (BRI). Vascular function was assessed by the cardio-ankle vascular  
index (CAVI) with the VaSera device, and brachial ankle pulse wave velocity (baPWV) was  
determined using a validated equation.

14  
15  
16  
17  
18  
19  
20  
21  
22  
23  
24  
25  
26  
27  
28  
29  
30  
31  
32  
33  
34  
35  
36  
37  
38  
39  
40  
41  
42  
43  
44  
45  
46  
47  
48  
49  
50  
51  
52  
53  
54  
55  
56  
57  
58  
59  
60  
**14 Results:** The mean adiposity measures were a BMI of 29.2±4.4, WHtR of 0.61±0.07, CUN-  
BAE of 35.7±1.7, and BRI of 5.8±1.7. The mean stiffness measures were a CAVI of 8.8±1.2  
and baPWV of 14.9±2.5. In multiple linear regression analysis, all adiposity measures were  
negatively associated with CAVI and baPWV ( $p<0.01$  for all) after adjustment for  
cardiovascular risk factors. The proportion of CAVI variability by the adiposity measures  
were 5.5% for BMI, 5.8% for CUN-BAE, 3.8% for WHtR, and 3.7% for BRI, which were  
higher among diabetic, obese, younger ( $\leq 62$  years), and non-hypertensive subjects who had  
similar activity and sedentary profiles.

22  
23  
24  
25  
**22 Conclusions:** Adiposity measures are negatively associated with arterial stiffness measures.  
The percentage of variation in CAVI explained by its relation to the different measures of  
adiposity ranges from 5.8% (CUN-BAE) to 3.7% (BRI). In the case of baPWV it oscillates  
between 0.7% (CUN-BAE and BMI) and 0.1% (WHtR).

1  
2  
3 1

4  
5 2 **Trial Registration:** Clinical Trials.gov Identifier: [https://clinicaltrials.gov/ct2/show/](https://clinicaltrials.gov/ct2/show/NCT01428934)  
6  
7 3 NCT01428934. Registered 2 September 2011. Last updated September 8, 2016.

8  
9 4 **Keywords:** body mass index, waist circumference, waist-to-height ratio, fat mass percent,  
10  
11 5 body roundness index, arterial stiffness  
12  
13 6

#### 14 7 **Strengths and limitations of this study**

15  
16 8 • This is the first study to investigate the association between adiposity measures using a  
17  
18 9 cardio-ankle vascular index with and brachial ankle pulse wave velocity in Caucasian adults  
19  
20 10 with intermediate cardiovascular risk.  
21  
22

23  
24 11 • All adiposity measures were negatively associated with CAVI and baPWV.  
25  
26

27 12 • The arterial stiffness variability was better explained for BMI and CUN-BAE and  
28  
29 13 when CAVI was used as a measure of stiffness rather than baPWV.  
30

31 14 • The main limitation of our study is its cross-sectional design, which does not allow  
32  
33 15 establishment of causal relationships or the direction in which adiposity measures influence  
34  
35 16 vascular function.  
36  
37

38 17  
39  
40  
41  
42  
43  
44  
45  
46  
47  
48  
49  
50  
51  
52  
53  
54  
55  
56  
57  
58  
59  
60

## 1 INTRODUCTION

2 Obesity has been linked to increased all-cause and cardiovascular mortality<sup>(1)</sup>. However, the  
3 mechanisms through which obesity can increase the frequency of cardiovascular disease  
4 beyond traditional risk factors are not clearly identified<sup>(2)</sup>. It has been suggested that,  
5 increased arterial stiffness may be a mechanism by which obesity increases cardiovascular  
6 risk independently of traditional risk factors<sup>(3)</sup>. It is known that arterial stiffness as evaluated  
7 by the brachial ankle pulse wave velocity (baPWV) is an independent predictor of coronary  
8 heart disease and mortality in both the general population<sup>(4)</sup> and in patients with diabetes  
9 mellitus<sup>(5; 6)</sup>. Similarly, the cardio-ankle vascular index (CAVI) is associated with carotid and  
10 coronary atherosclerosis<sup>(7; 8; 9)</sup> and is a predictor of cardiovascular events in obese patients  
11<sup>(10)</sup>. I. However, the relationship between adiposity and arterial stiffness remains  
12 controversial. In this respect, there are studies that show that the body mass index (BMI) has  
13 been associated with arterial stiffness in the general population<sup>(3; 11)</sup> and in diabetic patients  
14<sup>(12; 13)</sup>. However, other research has not found this association<sup>(14)</sup>, or the association  
15 disappeared after adjusting for potential confounders<sup>(13)</sup>, or it showed a negative association  
16<sup>(15; 16)</sup>. Additionally, there are studies that suggest a stronger correlation of measures of central  
17 or visceral adiposity than measures of general adiposity with arterial stiffness in the general  
18 population<sup>(3; 17; 18; 19; 20)</sup>, in diabetic patients<sup>(13)</sup>, and in diabetics and hypertensive patients<sup>(21)</sup>.  
19 Finally the Whitehall II Cohort study<sup>(22)</sup> showed that all measures of general adiposity,  
20 central adiposity, and body fat percentage were predictors of accelerated arterial stiffness in  
21 adults. In this context the analysis of the relationship between arterial stiffness and different  
22 measures of adiposity can help to understand the role of obesity in cardiovascular disease.

23 Our study was designed bearing in mind that cardiovascular events are more likely to occur in  
24 patients with intermediate cardiovascular risk<sup>(23)</sup>, and that there is a lack of studies analyzing  
25 the relationship of different adiposity measures with arterial stiffness in these subjects. We  
26 have established the following objectives: the primary aim of this study was to investigate the

1 relationship between adiposity measures and arterial stiffness in Caucasian adults with  
2 intermediate cardiovascular risk. The secondary aim was to analyze the differences between  
3 the associations of adiposity measures with distinct arterial stiffness markers. (Page 4 and 5).

## 4 5 **METHODS**

### 6 **Study design**

7 This trial was a cross-sectional study of subjects recruited to the *improving interMediAte RisK*  
8 *management (MARK)* study (NCT01428934)<sup>(24)</sup>, which was a longitudinal study designed to  
9 assess whether the ankle-brachial index, arterial stiffness (measured by CAVI), postprandial  
10 glucose, glycosylated hemoglobin, self-measured blood pressure, and the presence of  
11 comorbidities were independently associated with the occurrence of vascular events. It also  
12 investigated whether the predictive capacity of current risk equations could be improved in  
13 the intermediate risk population. The current study focused on the baseline visit. The second  
14 step will be a 5- and 10-year follow-up trial to assess cardiovascular morbidity and mortality.

### 15 16 **Study population**

17 In this multicenter project, the study population was obtained by random sampling from  
18 subjects who met the inclusion criteria and who were seeing general practitioners from July  
19 2011 to June 2013 at six primary care centers in three Spanish Autonomous Communities.  
20 Subjects were recruited from those aged 35 to 74 years with an intermediate cardiovascular  
21 risk, defined as a 10-year coronary risk ranging from 5%–15% according to the adapted  
22 Framingham risk equation<sup>(25)</sup>; 10-year vascular mortality risk greater than 1% and less than  
23 5% according to the SCORE equation<sup>(26)</sup>; or a moderate risk according to the European  
24 Society of Hypertension guidelines for the management of arterial hypertension<sup>(27)</sup>. Exclusion  
25 criteria included end-stage disease or institutionalization at the time of the visit, or history of  
26 atherosclerotic disease. This study analyzed 2354 of the 2495 subjects recruited in the MARK

1 study. For the present analysis, we excluded 141 individuals, with  $ABI \leq 0.9$  (n=99), or which  
2 CAVI (n=16), baPWV (n=12) and WC (n = 14) measurements were incomplete (Figure 1).

#### 4 **Variables and measurement instruments**

5 A detailed description of procedures for clinical data collection and laboratory tests has been  
6 published elsewhere <sup>(24)</sup>.

#### 8 **Anthropometric measurements**

9 Body weight was measured twice using a certified electronic scale (Seca 770, Medical scale  
10 and measurement systems, Birmingham, United Kingdom) after adequate calibration  
11 (precision  $\pm 0.1$  kg). Readings were rounded-off to the nearest 100 g. Height was measured  
12 using a stadiometer (Seca 222), and the average of two measurements was recorded. Body  
13 mass index (BMI) was calculated as weight (kg) divided by height squared ( $m^2$ ). Waist  
14 circumference was measured according to the 2007 recommendations of the Spanish Society  
15 for the Study of Obesity <sup>(28)</sup>. All measurements were performed with the subjects standing,  
16 wearing no shoes, and in light clothing. Waist-to-height ratio (WHtR) was calculated as the  
17 waist circumference (cm) divided by height (cm) <sup>(29; 30)</sup>.

18 The body fat percentage (BF%) was calculated according to the Clínica Universidad de  
19 Navarra-body adiposity estimator (CUN-BAE) using the recommendations of Gomez-  
20 Ambrosi et al. <sup>(31)</sup>:  $BF\% = -44.988 + (0.503 \times \text{Age}) + (10.689 \times \text{sex}) + (3.172 \times \text{BMI}) - (0.026$   
21  $\times \text{BMI}^2) + (0.181 \times \text{BMI} \times \text{sex}) - (0.02 \text{ BMI} \times \text{Age}) - (0.005 \times \text{BMI}^2 \times \text{sex}) +$   
22  $(0.00021 \times \text{BMI}^2 \times \text{Age})$ , where male=0 and female=1 for sex.

1  
2  
3 1 Body roundness index (BRI) was calculated using the following formula:  $BRI = 364.2 -$   
4  
5  $365.5 \times \sqrt{1 - \frac{(WC/(2\pi))^2}{(0.5height)^2}}$  (32). BRI can predict the percentage of body fat and visceral adipose  
6  
7  
8  
9  
10  
11  
12  
13  
14  
15  
16  
17  
18  
19  
20  
21  
22  
23  
24  
25  
26  
27  
28  
29  
30  
31  
32  
33  
34  
35  
36  
37  
38  
39  
40  
41  
42  
43  
44  
45  
46  
47  
48  
49  
50  
51  
52  
53  
54  
55  
56  
57  
58  
59  
60

### 5 **Cardio-ankle vascular index (CAVI) and brachial-ankle pulse wave velocity (baPWV)**

6 CAVI was measured using a *VaSera VS-1500®* device (*Fukuda Denshi*) (33; 34). CAVI values  
7 were calculated automatically by estimating the stiffness parameter  $\beta$  using the following  
8 equation:  $\beta = 2\rho \times 1 / (Ps - Pd) \times \ln (Ps / Pd) \times PWV^2$ , where  $\rho$  was blood density,  $Ps$  and  $Pd$   
9 were SBP and DBP in mmHg, and PWV was measured between the aortic valve and the  
10 ankle (35). The mean coefficient of variation of CAVI measurement was less than 5%, which is  
11 small enough to allow for clinical use of the index and confirmed that CAVI was reproducible  
12 index (34).

13 CAVI was calculated using the *VaSera VS-1500®* device (*Fukuda Denshi*), and with the  
14 values obtained, the baPWV was estimated using the equation  $baPWV = (0.5934 \times \text{height}$   
15  $(\text{cm}) + 14.4724) / tba$  (where  $tba$  was the time interval between the arm and ankle waves) (36).

16 Measurements were performed with the patient in the supine position after resting for 10  
17 minutes in a quiet room at a stable temperature. Subjects were instructed not to smoke or  
18 exercise in the hour before the test.

### 20 **Diagnosis of cardiovascular risk factors**

21 Subjects were considered to be hypertensive if they were previously diagnosed hypertension,  
22 if they were taking antihypertensive drugs, or if they had blood pressure levels  $\geq 140/90$   
23 mmHg. Diabetic subjects were those who had been previously diagnosed with the disease,  
24 were taking hypoglycemic drugs, or had a fasting blood glucose levels  $\geq 126$  mg/dL or  
25  $HbA1c \geq 6.5\%$ . Dyslipidemia was defined if they were treated with lipid-lowering drugs or



1 had altered LDL  $\geq$  130 mg/dl, HDL  $\leq$  45 mg/dl in men and  $\leq$  55 in women, and TG  $\geq$  150  
2 mg/dl, as established by the European Society of Cardiology (ESC) and the European  
3 Atherosclerosis Society (EAS) 2011 <sup>(37)</sup>.

#### 4

#### 5 **Office or clinical blood pressure**

6 Office blood pressure measurement involved three measurements of SBP and DBP using a  
7 validated OMRON model M10-IT sphygmomanometer (Omron Health Care, Kyoto, Japan).  
8 The measurements followed the recommendations of the European Society of Hypertension  
9 <sup>(38)</sup>, and the average of the last two measurements was used.

#### 10

#### 11 **Lifestyles**

#### 12 **Tobacco**

13 Smoking history was assessed by asking questions about the participant's smoking status  
14 (smoker/non-smoker). We considered smokers to include those who currently smoke or who  
15 had stopped smoking within the past year.

#### 16

#### 17 **Leisure time physical activity**

18 Leisure time physical activity (LTPA) was collected using the Minnesota LTPA Questionnaire  
19 <sup>(39)</sup> that was validated for Spanish men and women <sup>(40; 41)</sup>. The questionnaire was administered  
20 by trained interviewers who spent about 10 to 20 min per participant collecting detailed  
21 information about physical activity (PA) during the preceding year, the number of times this  
22 activity was performed, and the average duration of each activity on each occasion. Each PA  
23 has an intensity code, based on the ratio between the metabolic rate during PA practice and the  
24 basal metabolic rate (MET) <sup>(42)</sup>. It is assumed that 1 MET corresponds to approximately 1  
25 kcal/min of energy expenditure. Therefore, we can calculate the total energy expenditure in  
26 leisure time of PA (EEPA<sub>total</sub>) in kilocalories per week. Moreover, based on the PA intensity  
27 code, we could quantify the energy expenditure in physical activity (EEPA) according to the  
28 activity's classification as intense, moderate, or light intensity as follows: light PA intensity

1 was below 4 METs, such as walking (EEPA<sub>light</sub>). Moderate PA intensity was 4–5.5 METs, such as brisk walking (EEPA<sub>moderate</sub>). Intense PA intensity was greater than or equal to 6 METs, such as jogging (EEPA<sub>intense</sub>). Thus, for each particular subject: EEPA<sub>total</sub> = EEPA<sub>light</sub> + EEPA<sub>moderate</sub> + EEPA<sub>intense</sub>.

Based on recommendations from the American Heart Association<sup>(43)</sup>, we considered those participants who do not meet the recommendations of moderate-intensity aerobic PA practice for a minimum of 30 min on 5 days each week (EEPA<sub>moderate</sub> < 675 kcal/week) or high-intensity aerobic PA practice for a minimum of 20 min on 3 days each week (EEPA<sub>intense</sub> < 420 kcal/week) to be sedentary.

### Laboratory determinations

Venous blood sampling was performed between 08:00 and 09:00 hours after the individuals fasted and abstained from smoking and the consumption of alcohol and caffeinated beverages for the previous 12 hours. Fasting plasma glucose, serum, high-density lipoprotein (HDL) cholesterol concentrations and triglyceride concentrations were measured using standard enzymatic automated methods. Low-density lipoprotein cholesterol was estimated using the Friedewald equation when the direct parameter was not available. The atherogenic index was estimated (total cholesterol / HDL cholesterol). Blood samples were collected at the Health Center and analyzed at the hospital of reference.

The researchers who performed the different tests were blinded to the clinical data of the subjects. All assessments were made within a period of 10 days.

### Data analysis

Continuous variables were expressed as the mean ± standard deviation. Frequency distributions were used for categorical data. Comparisons between quantitative variables were performed using the Student's *t*-test, while the chi-squared test and Fisher's exact test were used for qualitative variables. Pearson's correlation coefficient was used to estimate the

1 relationship of the adiposity measures to CAVI and baPWV. We used Steiger's Z statistics for  
2 testing the significance of the difference between correlations coefficients <sup>(44)</sup>.

3 Four different multiple linear regression models were used to analyze the associations of  
4 each adiposity measure with CAVI, and four other models were used with baPWV. CAVI and  
5 baPWV were the dependent variables, and the adiposity measures were the independent  
6 variables in each model. All models were adjusted for age (years), sex (0 = male and 1 =  
7 female), systolic blood pressure (SBP), smoking status (0 = No and 1 = Yes), atherogenic  
8 index, HbA1c, and METs/min/week. The explanatory capacity of the model was measured by  
9  $R^2$ , and the proportion attributed to each variable was estimated by the change in  $R^2$ . The  
10 analysis was also performed by age groups, diagnosis of diabetes, hypertension, and obesity.

11 ANCOVA models were used to test the differences in the mean values of CAVI and  
12 baPWV with the quartiles of the four adiposity measures after adjusting for the confounding  
13 variables that were used in the regression analysis. Pairwise post hoc comparisons were  
14 examined using the Bonferroni test. Data were analyzed using SPSS Statistics for Windows  
15 version 23.0 (IBM Corp, Armonk, NY). Values of  $p < 0.05$  were considered statistically  
16 significant.

17

### 18 **Ethics statement**

19 All participants were informed of the study objectives and procedures and they all signed an  
20 informed consent form to participate. The study was approved by the Clinical Research Ethics  
21 Committee of the Primary Care Research Institute Jordi Gol, the Health Care Area of  
22 Salamanca, and Palma of Mallorca. The study was conducted following the recommendations  
23 of the Declaration of Helsinki <sup>(45)</sup>. The confidentiality of information provided by participants  
24 was ensured, complying with the rules established by Spanish Organic Law 15/1999, of 13  
25 December on the Protection of Personal Data.

1  
2  
3 14  
5 2 **RESULTS**

6  
7 Anthropometric measures, clinical characteristics, and vascular function measures of the  
8 subjects are presented in Table 1. The mean age of the patients was  $61.4 \pm 7.7$  years, and  
9 61.9% were male. Male subjects had a higher percentage of smokers (31.5 vs. 22.7) and  
10 hypertension (80.1 vs. 75.4) compared with females. However, females had a higher  
11 prevalence of obesity (40.4 vs. 33.4), sedentariness (53.7 vs. 37.0), dyslipidemia (73.1 vs.  
12 63.6), and diabetes (36.5 vs. 31.8) compared with males. The mean value of CAVI was  
13  $8.8 \pm 1.2$  (8.9 in males and 8.6 in females,  $p < 0.001$ ) and the mean baPWV was  $14.9 \pm 2.5$  (14.8  
14 in males and 15.0 in females). All of the analyzed adiposity measures except for waist  
15 circumference presented higher values in women compared with men.

16  
17 Pearson's correlation coefficient results between the adiposity measures and the vascular  
18 function parameters are shown in Table 2. All adiposity measures were negatively correlated  
19 with CAVI, and this correlation increases after adjusting for age, sex, and SBP. The  
20 correlation between CAVI and baPWV was  $r = 0.745$  ( $p < 0.001$ ). We found differences in  
21 correlation coefficients between CAVI, baPWV and measures of adiposity ( $p < 0.001$  in all  
22 cases).

23  
24 Figure 1S (Supplementary material) shows the estimated marginal means of CAVI (a) and  
25 baPWV (b) by quartiles of the different adiposity measures. After adjustment for the variables  
used in the multiple linear regression analysis, the mean CAVI values decreased as the  
quartiles of the four adiposity measurements increased ( $p < 0.05$ ). However, the same is not  
true of baPWV with WHtR and BRI ( $p > 0.05$ ).

In the multiple linear regression analysis, CAVI and baPWV showed negative associations  
with all adiposity measures ( $p < 0.01$  for all) after adjustment for age, sex, SBP, smoking,  
atherogenic index, HbA1c, and METs/min/week (Table 3). The proportion of CAVI

1  
2  
3 1 variability which can be attributed to the variation in the adiposity measures was 5.5% for  
4  
5 2 BMI, 5.8% for CUN-BAE, 3.8% for WHtR, and 3.7% for BRI. 5.5% for BMI, 5.8% for  
6  
7 3 CUN-BAE, 3.8% for WHtR, and 3.7% for BRI. For baPWV, the variability by the measures  
8  
9 4 of adiposity were 0.7% for BMI, and CUN-BAE, and 0.1% for WHtR, and 0.2 for BRI. The  
10  
11 5 association between adiposity measurements and CAVI revealed standardized  $\beta$  between -  
12  
13 6 0.450 (CUN-BAE) and -0.221 (WHtR). In the case of baPWV the values oscillate between -  
14  
15 7 0.152 (CUN-BAE) and -0.044 (WHtR).

16  
17  
18 8 In the multiple linear regression analysis by subgroup, the proportion of CAVI variability  
19  
20 9 by adiposity measures was higher among diabetics, obese, non-hypertensive, and subjects 62  
21  
22 10 years of age or younger, and was similar in active and sedentary people (Table 4).  
23  
24

## 25 26 27 12 **DISCUSSION**

28  
29 13 The results of this study show that adiposity measures have a negative association with  
30  
31 14 arterial stiffness, especially CAVI. BMI and CUN-BAE are the ones with the highest  
32  
33 15 coefficient of determination. We found a negative association of different adiposity measures  
34  
35 16 with CAVI and baPWV after adjustment for other cardiovascular risk factors.  
36  
37

38  
39 17 In this study the mean value of CAVI was higher in males, which is in agreement with  
40  
41 18 published data indicating that CAVI increases linearly with age, and is higher in males than in  
42  
43 19 females (approximately 0.2, which is equivalent to 4–5 years old)<sup>(22; 46)</sup>. Similarly, there was  
44  
45 20 no difference in the mean baPWV between the sexes, which is consistent with data published  
46  
47 21 by Tomiyama et al.<sup>(47)</sup> who showed that the effect of age on baPWV is different according to  
48  
49 22 sex. Females have a higher arterial stiffness than prepubertal males, and this increases after  
50  
51 23 menopause. Men, however, experience a linear increase in arterial stiffness from puberty.  
52  
53 24 This suggests that women have large arteries that are intrinsically more rigid compared with  
54  
55 25 men, but these effects are mitigated by sex steroids during the reproductive years<sup>(48; 49)</sup>.  
56  
57  
58  
59  
60

1  
2  
3 1 This negative association with CAVI has already been described in previous studies. BMI  
4  
5 2 has shown a negative association in children <sup>(50)</sup>, and in hypertensive and type 2 diabetes  
6  
7 3 patients in Ghana <sup>(51)</sup>. Similarly, waist circumference has shown a negative relationship in  
8  
9 4 subjects with metabolic syndrome <sup>(52; 53)</sup>.

10  
11 5 However, other authors have described a positive association of different adiposity  
12  
13 6 measures with the  $\beta$ -stiffness parameter, but after adjustment for age and other possible  
14  
15 7 confounding factors, the association remained for only men with type 2 diabetes mellitus <sup>(54)</sup>.  
16  
17 8 Other studies have also found no association between BMI and CAVI <sup>(55)</sup>.

18  
19  
20 9 Studies analyzing the association of adiposity measures with baPWV have also been  
21  
22 10 performed mainly in Eastern populations and have focused on assessing the association  
23  
24 11 between BMI and waist circumference as measures of adiposity. The results are controversial,  
25  
26 12 with some finding a negative association with BMI <sup>(47)</sup>, and with waist circumference in men  
27  
28 13 only or in women only <sup>(56; 57)</sup>. However, other studies have found a positive correlation with  
29  
30 14 BMI and waist circumference <sup>(58)</sup>. One study that analyzed the association of different  
31  
32 15 adiposity parameters with baPWV in middle-aged adults found a positive association with  
33  
34 16 waist circumference and visceral fat but not with body fat percentage <sup>(59)</sup>.

35  
36  
37  
38 17 The results are also not consistent in studies that used the carotid-femoral pulse wave  
39  
40 18 velocity (cfPWV) as a measure of stiffness. Some studies have described a greater association  
41  
42 19 with measures of central or visceral adiposity in both the general population and in diabetics  
43  
44 20 <sup>(3; 13; 17; 18; 19; 21)</sup>. However, Strasser et al. <sup>(59)</sup> found no association with body fat percentage,  
45  
46 21 and other studies also found no association between BMI and cfPWV <sup>(13; 14)</sup>. Rodrigues et al.  
47  
48 22 <sup>(15)</sup>, reported that BMI was negatively associated with cfPWV ( $\beta = -0.103$ ) in a large  
49  
50 23 population sample. The Whitehall II Cohort study <sup>(22)</sup>, which was completed based on staff  
51  
52 24 lists from offices located in central London, showed that all measures of adiposity were robust  
53  
54 25 predictors of accelerated cfPWV, after adjusting them for potential confounding factors. The  
55  
56  
57  
58  
59  
60

1 use of different measures to measure arterial stiffness such as CAVI and baPWV, as well as  
2 being a population with intermediate cardiovascular risk could explain some of the  
3 discrepancies with our study.

4 Arterial stiffness depends on arterial wall elasticity and diameter, and a positive correlation  
5 was found between BMI and aortic diameter measured by nuclear magnetic resonance <sup>(60)</sup>.  
6 This could partially explain the negative association between measures of adiposity and  
7 arterial stiffness. These discrepancies between studies may be partially explained by different  
8 methods of arterial stiffness measurement and the adjustment variables used. This may be  
9 because CAVI reflects central and peripheral arterial stiffness and is less influenced by blood  
10 pressure values at the time of measurement <sup>(35; 61; 62)</sup>. Conversely, arterial stiffness assessed  
11 using baPWV is a measure of peripheral arterial stiffness <sup>(36)</sup>. Other potential influences on  
12 the observed differences are age, sex, race, prevalent cardiovascular risk, and drugs used for  
13 treatment of the different risk factor <sup>(12; 47; 56; 58)</sup>. These differences between CAVI and  
14 baPWV, as measures of rigidity, could explain the results shown in this study, suggesting a  
15 greater association of adiposity measurements with CAVI than with baPWV.

16 The proportion of baPWV variability explained by adiposity measurements in our study  
17 was less than 1% (between 0.7% for BMI and 0.1% for CUN-BAE). The results are also  
18 lower than those published for the general population by Wohlfahrt et al. (5% for WHtR and  
19 3% for BMI) <sup>(3)</sup>, but similar to the results reported by Rodrigues et al. (BMI 0.7%) <sup>(15)</sup>. The  
20 proportion of CAVI variability that is explained by adiposity measures was higher than 5%  
21 with CUN-BAE and BMI and higher than 3.5% with WHtR and BRI. In the subgroup  
22 analysis, the proportion of CAVI variability explained by adiposity measures was higher in  
23 diabetic, obese, younger, and non-hypertensive subjects. Our results show that the influence  
24 of adiposity measurements on CAVI is greater than on baPWV. To our knowledge, no other  
25 study has analyzed this aspect using CAVI. The novel results of this study may have

1 important clinical relevance because they show the associations of both general and  
2 abdominal obesity measures with CAVI and baPWV in subjects with intermediate  
3 cardiovascular risk. Additionally, the results provide information that could be used in new  
4 prospective studies and could potentially help to improve cardiovascular risk equations.

5 Numerous studies have been carried out analyzing the effect of weight loss on arterial  
6 stiffness, most of which have been collected in two meta-analyses. The first analyzed the  
7 results of 20 studies (1259 participants), and showed that modest weight loss (8% of initial  
8 body weight) achieved with diet and lifestyle interventions seems to improve PWV. The  
9 standardized mean difference (SMD) for the overall effect of weight loss on baPWV  
10 measured at all sites was -0.32 (95% CI, -0.41, -0.24; P=0.0001). cfPWV (SMD, -0.35; 95%  
11 CI, -0.44, -0.26; P=0.0001; 16 studies) and baPWV (SMD, -0.48; 95% CI, -0.78, -0.18;  
12 P=0.002; 5 studies) improved with weight loss.<sup>(63)</sup> In the second meta-analysis, 43 studies  
13 (4231 participants) were included and it was found that the average weight loss was  
14 approximately 11% of the initial body weight and that weight loss improved CAVI (SMD= -  
15 0.48; p = 0.04)<sup>(64)</sup>.

16 In summary, our results showed the correlation between measures of adiposity and  
17 measures of arterial stiffness is greater with CAVI than with baPWV. The different measures  
18 of adiposity better explained the variability of arterial stiffness evaluated using CAVI than  
19 using baPWV. All this suggests that the relationship with adiposity measures is greater if the  
20 arterial stiffness is measured using CAVI than using baPWV. This is likely because CAVI  
21 measures rigidity at the central and peripheral levels and it is not influenced by blood pressure  
22 at the time of measurement<sup>(35; 61; 65; 66)</sup>.

23 The main limitation of our study is its cross-sectional design, which does not allow us to  
24 establish causal relationships or the direction of influence of adiposity measures in vascular  
25 function. Another limitation is that the population was ethnically homogeneous (all subjects



1 were Caucasians with intermediate cardiovascular risk). Therefore, the extrapolation of our  
2 findings may be limited.

#### 4 **CONCLUSION**

5 In conclusion, the adiposity measures analyzed show a negative association with arterial  
6 stiffness measures. The percentage of variation in CAVI explained by its relation to the  
7 different measures of adiposity ranges from 5.8% (CUN-BAE) to 3.7% (BRI). In the case of  
8 baPWV it oscillates between 0.7% (CUN-BAE and BMI) and 0.1% (WHtR). These results  
9 suggest that measures of general adiposity and body fat percentage better explain the  
10 variability of CAVI compared with measures of abdominal and visceral adiposity.

12 **Acknowledgments:** We are grateful to all professionals participating in the MARK study.

13 Lead author for this group: Rafel Ramos, Research Unit, Primary Health Care, Girona, Jordi  
14 Gol Institute for Primary Care Research (IDIAP Jordi Gol), Catalonia, Spain, E-mail:  
15 rramos.girona.ics@gencat.net. Coordinating Center: Rafel Ramos, Ruth Martí, Dídac  
16 Parramon, Anna Ponjoan, Miquel Quesada, Maria Garcia-Gil, Martina Sidera and Lourdes  
17 Camós, Research Unit, Primary Health Care, Jordi Gol Institute for Primary Care Research  
18 (IDIAP Jordi Gol), C/Maluquer Salvador, 11, 17002-Girona, Catalonia, Spain. Fernando  
19 Montesinos, Ignacio Montoya, Carlos López, Anna Agell, Núria Pagès of the Primary Care  
20 Services, Girona, Catalan Institute of Health (ICS), Catalonia, Spain. Irina Gil, Anna Maria-  
21 Castro of the Primary Care Services, Girona, Institut d'Assistència Sanitària (IAS), Catalonia,  
22 Spain. Fernando Rigo, Guillermo Frontera, Antònia Rotger, Natalia Feuerbach, Susana Pons,  
23 Natividad Garcia, John Guillaumet, Micaela Llull and Mercedes Gutierrez of the Health  
24 Center Primary Care San Agustín, Ibsalut Balears, Spain. Cristina Agudo-Conde, Leticia  
25 Gómez-Sanchez, Carmen Castaño-Sanchez, Carmela Rodriguez-Martín, Benigna Sanchez-

1  
2  
3 1 Salgado, Angela de Cabo-Laso, Emiliano Rodriguez-Sanchez, Jose Angel Maderuelo-  
4  
5 2 Fernandez, Marta Gómez-Sánchez, Emilio Ramos-Delgado, Carmen Patino-Alonso, Jose I  
6  
7 3 Recio-Rodriguez, Manuel A Gomez-Marcos and Luis Garcia-Ortiz, Primary Care Research  
8  
9 4 Unit of The Alamedilla, Salamanca, Spain, Castilla and León Health Service–SACYL.  
10  
11  
12 5

13  
14 6 **Contributors:** LG-S designed the study, wrote the protocol, participated in fundraising,  
15  
16 7 interpreted the results, prepared the manuscript draft, performed all analytical testing,  
17  
18 8 interpreted the results and reviewed the manuscript and corrected the final version of the  
19  
20 9 manuscript. JIR-R, RM, FR, and CA-C participated in the study design, data collection and  
21  
22 10 manuscript review. ER-S and JAM-F participated in the study design, interpretation of results  
23  
24 11 and manuscript review. MCP-A participated in the analysis of results and final review of the  
25  
26 12 manuscript. LG-O, RR, and MAG-M participated in the protocol design, fundraising, analysis  
27  
28 13 of results, and final review of the manuscript. All authors reviewed and approved the final  
29  
30 14 version of the manuscript.  
31  
32  
33

34 15  
35  
36 16 **Funding:** This research was supported by grants from the Spanish Ministry of Science and  
37  
38 17 Innovation (MICINN), the Carlos III Health Institute/European Regional Development Fund  
39  
40 18 (ERDF) (MICINN, ISCIII/FEDER) (Red RedIAPP RD06/0018, Research Groups:  
41  
42 19 RD16/0007/0003, RD16/0007/0004, RD16/0007/0008), the Health Research Fund  
43  
44 20 (PI10/01088, PI10/02077, PI10/02043, PI13/01930), and the Regional Health Management of  
45  
46 21 Castile and León (GRS 635/A/11; GRS 906/B/14).  
47  
48  
49

50 22  
51  
52 23 **Competing interests:** None declared.  
53  
54 24  
55  
56  
57  
58  
59  
60

1  
2  
3 1 **Ethics approval:** The Clinical Research Ethics Committee of the Primary Care Research  
4  
5 2 Institute Jordi Gol, the Health Care Area of Salamanca and Palma of Mallorca.  
6  
7  
8 3

9  
10 4 **Provenance and peer review:** Not commissioned; externally peer reviewed.  
11  
12 5

13  
14 6 **Data sharing statement:** No additional data are available.  
15  
16 7

17  
18 8 **Informed consent:** Obtained.  
19  
20 9

21  
22  
23 10 **Open Access:** This is an Open Access article distributed in accordance with the Creative  
24  
25 11 Commons Attribution Non Commercial (CC BY-NC 4.0) license, which permits others to  
26  
27 12 distribute, remix, adapt, build upon this work non commercially, and license their derivative  
28  
29 13 works on different terms, provided the original work is properly cited and the use is non-  
30  
31 14 commercial. See: <http://creativecommons.org/licenses/by-nc/4.0/>  
32  
33  
34 15

1  
2  
3  
4  
5  
6  
7  
8  
9  
10  
11  
12  
13  
14  
15  
16  
17  
18  
19  
20  
21  
22  
23  
24  
25  
26  
27  
28  
29  
30  
31  
32  
33  
34  
35  
36  
37  
38  
39  
40  
41  
42  
43  
44  
45  
46  
47  
48  
49  
50  
51  
52  
53  
54  
55  
56  
57  
58  
59  
60

1 **Figure legends**

2 **Figure 1.** Flow chart of this MARK substudy

3 Abbreviations: N, number; CAVI, cardio-ankle vascular index; baPWV, brachial-ankle pulse

4 wave velocity; ABI, ankle-brachial index; WC, waist circumference

5

For peer review only

1 **Figure 1S (Supplementary material).** Data are given as medias estimadas de CAVI y  
2 baPWV por cuartiles de BMI, WHtR, CUN-BAE and BRI.

3 Adjusted for age (years), sex (0=male and 1=female), systolic blood pressure smoking  
4 (0=No and 1=Yes), atherogenic index, HbA1c, and METs/min/week

5 baPWV and CAVI levels were compared using an ANOVA.

6 Abbreviations: CAVI, cardio-ankle vascular index; ba-PWV, brachial-ankle pulse wave  
7 velocity; BMI, body mass index; WHtR, waist-to-height ratio; CUN-BAE, Clínica  
8 Universidad de Navarra - body adiposity estimator; BRI, body roundness index

## 9 10 **References**

- 11 1. Adams KF, Schatzkin A, Harris TB *et al.* (2006) Overweight, obesity, and mortality in a large  
12 prospective cohort of persons 50 to 71 years old. *N Engl J Med* **355**, 763-778.
- 13 2. Poirier P, Giles TD, Bray GA *et al.* (2006) Obesity and cardiovascular disease: pathophysiology,  
14 evaluation, and effect of weight loss: an update of the 1997 American Heart Association Scientific  
15 Statement on Obesity and Heart Disease from the Obesity Committee of the Council on Nutrition,  
16 Physical Activity, and Metabolism. *Circulation* **113**, 898-918.
- 17 3. Wohlfahrt P, Somers VK, Cifkova R *et al.* (2014) Relationship between measures of central and  
18 general adiposity with aortic stiffness in the general population. *Atherosclerosis* **235**, 625-631.
- 19 4. Turin TC, Kita Y, Rumana N *et al.* (2010) Brachial-ankle pulse wave velocity predicts all-cause  
20 mortality in the general population: findings from the Takashima study, Japan. *Hypertens Res* **33**,  
21 922-925.
- 22 5. Maeda Y, Inoguchi T, Etoh E *et al.* (2014) Brachial-ankle pulse wave velocity predicts all-cause  
23 mortality and cardiovascular events in patients with diabetes: the Kyushu Prevention Study of  
24 Atherosclerosis. *Diabetes Care* **37**, 2383-2390.
- 25 6. Ikura K, Hanai K, Oka S *et al.* (2016) Brachial-ankle pulse wave velocity, but not ankle-brachial  
26 index, predicts all-cause mortality in patients with diabetes after lower extremity amputation. *J*  
27 *Diabetes Investig.*
- 28 7. Izuwara M, Shioji K, Kadota S *et al.* (2008) Relationship of cardio-ankle vascular index (CAVI) to  
29 carotid and coronary arteriosclerosis. *Circ J* **72**, 1762-1767.
- 30 8. Okura T, Watanabe S, Kurata M *et al.* (2007) Relationship between cardio-ankle vascular index  
31 (CAVI) and carotid atherosclerosis in patients with essential hypertension. *Hypertens Res* **30**, 335-  
32 340.
- 33 9. Nakamura K, Tomaru T, Yamamura S *et al.* (2008) Cardio-ankle vascular index is a candidate  
34 predictor of coronary atherosclerosis. *Circ J* **72**, 598-604.
- 35 10. Satoh-Asahara N, Kotani K, Yamakage H *et al.* (2015) Cardio-ankle vascular index predicts for the  
36 incidence of cardiovascular events in obese patients: a multicenter prospective cohort study (Japan  
37 Obesity and Metabolic Syndrome Study: JOMS). *Atherosclerosis* **242**, 461-468.
- 38 11. Wohlfahrt P, Krajcoviechova A, Seidlerova J *et al.* (2013) Lower-extremity arterial stiffness vs.  
39 aortic stiffness in the general population. *Hypertens Res* **36**, 718-724.
- 40 12. Moh MC, Sum CF, Lam BC *et al.* (2015) Evaluation of body adiposity index as a predictor of aortic  
41 stiffness in multi-ethnic Asian population with type 2 diabetes. *Diab Vasc Dis Res* **12**, 111-118.

13. Teoh WL, Price JF, Williamson RM *et al.* (2013) Metabolic parameters associated with arterial stiffness in older adults with Type 2 diabetes: the Edinburgh Type 2 diabetes study. *J Hypertens* **31**, 1010-1017.
14. Hansen TW, Jeppesen J, Rasmussen S *et al.* (2004) Relation between insulin and aortic stiffness: a population-based study. *J Hum Hypertens* **18**, 1-7.
15. Rodrigues SL, Baldo MP, Lani L *et al.* (2012) Body mass index is not independently associated with increased aortic stiffness in a Brazilian population. *Am J Hypertens* **25**, 1064-1069.
16. Huisman HW, Schutte R, Venter HL *et al.* (2015) Low BMI is inversely associated with arterial stiffness in Africans. *Br J Nutr* **113**, 1621-1627.
17. Canepa M, AlGhatrif M, Pestelli G *et al.* (2014) Impact of central obesity on the estimation of carotid-femoral pulse wave velocity. *Am J Hypertens* **27**, 1209-1217.
18. Scuteri A, Orru M, Morrell CH *et al.* (2012) Associations of large artery structure and function with adiposity: effects of age, gender, and hypertension. The SardinIA Study. *Atherosclerosis* **221**, 189-197.
19. Johansen NB, Vistisen D, Brunner EJ *et al.* (2012) Determinants of aortic stiffness: 16-year follow-up of the Whitehall II study. *PLoS One* **7**, e37165.
20. Wildman RP, Mackey RH, Bostom A *et al.* (2003) Measures of obesity are associated with vascular stiffness in young and older adults. *Hypertension* **42**, 468-473.
21. Recio-Rodriguez JI, Gomez-Marcos MA, Patino-Alonso MC *et al.* (2012) Abdominal obesity vs general obesity for identifying arterial stiffness, subclinical atherosclerosis and wave reflection in healthy, diabetics and hypertensive. *BMC Cardiovasc Disord* **12**, 3.
22. Brunner EJ, Shipley MJ, Ahmadi-Abhari S *et al.* (2015) Adiposity, obesity, and arterial aging: longitudinal study of aortic stiffness in the Whitehall II cohort. *Hypertension* **66**, 294-300.
23. Marrugat J, Vila J, Baena-Diez JM *et al.* (2011) [Relative validity of the 10-year cardiovascular risk estimate in a population cohort of the REGICOR study]. *Rev Esp Cardiol* **64**, 385-394.
24. Marti R, Parramon D, Garcia-Ortiz L *et al.* (2011) Improving interMediate risk management. MARK study. *BMC Cardiovasc Disord* **11**, 61.
25. Marrugat J, D'Agostino R, Sullivan L *et al.* (2003) An adaptation of the Framingham coronary heart disease risk function to European Mediterranean areas. *J Epidemiol Community Health* **57**, 634-638.
26. Conroy RM, Pyorala K, Fitzgerald AP *et al.* (2003) Estimation of ten-year risk of fatal cardiovascular disease in Europe: the SCORE project. *Eur Heart J* **24**, 987-1003.
27. Mancia G, Fagard R, Narkiewicz K *et al.* (2013) 2013 ESH/ESC Guidelines for the management of arterial hypertension: the Task Force for the management of arterial hypertension of the European Society of Hypertension (ESH) and of the European Society of Cardiology (ESC). *J Hypertens* **31**, 1281-1357.
28. Salas-Salvado J, Rubio MA, Barbany M *et al.* (2007) [SEEDO 2007 Consensus for the evaluation of overweight and obesity and the establishment of therapeutic intervention criteria]. *Med Clin (Barc)* **128**, 184-196.
29. Browning LM, Hsieh SD, Ashwell M (2010) A systematic review of waist-to-height ratio as a screening tool for the prediction of cardiovascular disease and diabetes: 0.5 could be a suitable global boundary value. *Nutr Res Rev* **23**, 247-269.
30. Oliveros E, Somers VK, Sochor O *et al.* (2014) The concept of normal weight obesity. *Prog Cardiovasc Dis* **56**, 426-433.
31. Gomez-Ambrosi J, Silva C, Catalan V *et al.* (2012) Clinical usefulness of a new equation for estimating body fat. *Diabetes Care* **35**, 383-388.
32. Thomas DM, Bredlau C, Bosy-Westphal A *et al.* (2013) Relationships between body roundness with body fat and visceral adipose tissue emerging from a new geometrical model. *Obesity (Silver Spring)* **21**, 2264-2271.
33. Satoh N, Shimatsu A, Kato Y *et al.* (2008) Evaluation of the cardio-ankle vascular index, a new indicator of arterial stiffness independent of blood pressure, in obesity and metabolic syndrome. *Hypertens Res* **31**, 1921-1930.

- 1  
2  
3 1 34. Shirai K, Utino J, Otsuka K *et al.* (2006) A novel blood pressure-independent arterial wall stiffness  
4 2 parameter; cardio-ankle vascular index (CAVI). *J Atheroscler Thromb* **13**, 101-107.
- 5 3 35. Shirai K, Hiruta N, Song M *et al.* (2011) Cardio-ankle vascular index (CAVI) as a novel indicator of  
6 4 arterial stiffness: theory, evidence and perspectives. *J Atheroscler Thromb* **18**, 924-938.
- 7 5 36. Yamashina A, Tomiyama H, Takeda K *et al.* (2002) Validity, reproducibility, and clinical significance  
8 6 of noninvasive brachial-ankle pulse wave velocity measurement. *Hypertens Res* **25**, 359-364.
- 9 7 37. Catapano AL, Reiner Z, De Backer G *et al.* (2011) ESC/EAS Guidelines for the management of  
10 8 dyslipidaemias The Task Force for the management of dyslipidaemias of the European Society of  
11 9 Cardiology (ESC) and the European Atherosclerosis Society (EAS). *Atherosclerosis* **217**, 3-46.
- 12 10 38. O'Brien E, Asmar R, Beilin L *et al.* (2005) Practice guidelines of the European Society of  
13 11 Hypertension for clinic, ambulatory and self blood pressure measurement. *J Hypertens* **23**, 697-701.
- 14 12 39. Taylor HL, Jacobs DR, Jr., Schucker B *et al.* (1978) A questionnaire for the assessment of leisure  
15 13 time physical activities. *J Chronic Dis* **31**, 741-755.
- 16 14 40. Elosua R, Marrugat J, Molina L *et al.* (1994) Validation of the Minnesota Leisure Time Physical  
17 15 Activity Questionnaire in Spanish men. The MARATHOM Investigators. *Am J Epidemiol* **139**, 1197-  
18 16 1209.
- 19 17 41. Elosua R, Garcia M, Aguilar A *et al.* (2000) Validation of the Minnesota Leisure Time Physical  
20 18 Activity Questionnaire In Spanish Women. Investigators of the MARATDON Group. *Med Sci Sports*  
21 19 *Exerc* **32**, 1431-1437.
- 22 20 42. Ainsworth BE, Haskell WL, Leon AS *et al.* (1993) Compendium of physical activities: classification  
23 21 of energy costs of human physical activities. *Med Sci Sports Exerc* **25**, 71-80.
- 24 22 43. Haskell WL, Lee IM, Pate RR *et al.* (2007) Physical activity and public health: updated  
25 23 recommendation for adults from the American College of Sports Medicine and the American Heart  
26 24 Association. *Circulation* **116**, 1081-1093.
- 27 25 44. Steiger JH (1980) Tests for comparing elements of a correlation matrix. *Psychological Bulletin* **87**,  
28 26 245-251.
- 29 27 45. (2013) World Medical Association Declaration of Helsinki: ethical principles for medical research  
30 28 involving human subjects. *JAMA* **310**, 2191-2194.
- 31 29 46. Choi SY, Oh BH, Bae Park J *et al.* (2013) Age-associated increase in arterial stiffness measured  
32 30 according to the cardio-ankle vascular index without blood pressure changes in healthy adults. *J*  
33 31 *Atheroscler Thromb* **20**, 911-923.
- 34 32 47. Tomiyama H, Yamashina A, Arai T *et al.* (2003) Influences of age and gender on results of  
35 33 noninvasive brachial-ankle pulse wave velocity measurement--a survey of 12517 subjects.  
36 34 *Atherosclerosis* **166**, 303-309.
- 37 35 48. Marlatt KL, Kelly AS, Steinberger J *et al.* (2013) The influence of gender on carotid artery  
38 36 compliance and distensibility in children and adults. *J Clin Ultrasound* **41**, 340-346.
- 39 37 49. Bartok CJ, Marini ME, Birch LL (2011) High body mass index percentile accurately reflects excess  
40 38 adiposity in white girls. *J Am Diet Assoc* **111**, 437-441.
- 41 39 50. Philip R, Alpert BS, Schwingshackl A *et al.* (2015) Inverse Relationship between Cardio-Ankle  
42 40 Vascular Index and Body Mass Index in Healthy Children. *J Pediatr* **167**, 361-365 e361.
- 43 41 51. Yeboah K, Antwi DA, Gyan B *et al.* (2016) Arterial stiffness in hypertensive and type 2 diabetes  
44 42 patients in Ghana: comparison of the cardio-ankle vascular index and central aortic techniques. *BMC*  
45 43 *Endocr Disord* **16**, 53.
- 46 44 52. Al-Daghri NM, Al-Attas OS, Wani K *et al.* (2015) Sensitivity of various adiposity indices in  
47 45 identifying cardiometabolic diseases in Arab adults. *Cardiovasc Diabetol* **14**, 101.
- 48 46 53. Gomez-Sanchez L, Garcia-Ortiz L, Patino-Alonso MC *et al.* (2016) Association of metabolic  
49 47 syndrome and its components with arterial stiffness in Caucasian subjects of the MARK study: a  
50 48 cross-sectional trial. *Cardiovasc Diabetol* **15**, 148.
- 51 49 54. Morigami H, Morioka T, Yamazaki Y *et al.* (2016) Visceral Adiposity is Preferentially Associated  
52 50 with Vascular Stiffness Rather than Thickness in Men with Type 2 Diabetes. *J Atheroscler Thromb* **23**,  
53 51 1067-1079.

- 1  
2  
3 1 55. Kawada T, Andou T, Fukumitsu M (2014) Relationship between cardio-ankle vascular index and  
4 2 components of metabolic syndrome in combination with sex and age. *Diabetes Metab Syndr* **8**, 242-  
5 3 244.  
6 4 56. Kim HL, Lee JM, Seo JB *et al.* (2015) The effects of metabolic syndrome and its components on  
7 5 arterial stiffness in relation to gender. *J Cardiol* **65**, 243-249.  
8 6 57. Zhou F, Zhang H, Yao W *et al.* (2014) Relationship between brachial-ankle pulse wave velocity and  
9 7 metabolic syndrome components in a Chinese population. *J Biomed Res* **28**, 262-268.  
10 8 58. Weng C, Yuan H, Yang K *et al.* (2013) Gender-specific association between the metabolic  
11 9 syndrome and arterial stiffness in 8,300 subjects. *Am J Med Sci* **346**, 289-294.  
12 10 59. Strasser B, Arvandi M, Pasha EP *et al.* (2015) Abdominal obesity is associated with arterial  
13 11 stiffness in middle-aged adults. *Nutr Metab Cardiovasc Dis* **25**, 495-502.  
14 12 60. Danias PG, Tritos NA, Stuber M *et al.* (2003) Comparison of aortic elasticity determined by  
15 13 cardiovascular magnetic resonance imaging in obese versus lean adults. *Am J Cardiol* **91**, 195-199.  
16 14 61. Takaki A, Ogawa H, Wakeyama T *et al.* (2008) Cardio-ankle vascular index is superior to brachial-  
17 15 ankle pulse wave velocity as an index of arterial stiffness. *Hypertens Res* **31**, 1347-1355.  
18 16 62. Shirai K (2011) Analysis of vascular function using the cardio-ankle vascular index (CAVI).  
19 17 *Hypertens Res* **34**, 684-685.  
20 18 63. Petersen KS, Blanch N, Keogh JB *et al.* (2015) Effect of weight loss on pulse wave velocity:  
21 19 systematic review and meta-analysis. *Arteriosclerosis, thrombosis, and vascular biology* **35**, 243-252.  
22 20 64. Petersen KS, Clifton PM, Lister N *et al.* (2016) Effect of weight loss induced by energy restriction  
23 21 on measures of arterial compliance: A systematic review and meta-analysis. *Atherosclerosis* **247**, 7-  
24 22 20.  
25 23 65. Kubozono T, Miyata M, Ueyama K *et al.* (2007) Clinical significance and reproducibility of new  
26 24 arterial distensibility index. *Circ J* **71**, 89-94.  
27 25 66. Nagayama D, Endo K, Ohira M *et al.* (2013) Effects of body weight reduction on cardio-ankle  
28 26 vascular index (CAVI). *Obes Res Clin Pract* **7**, e139-e145.

27

28



**Table 1 General characteristics of all the sample and by gender.**

| Variables                         | Global (n=2354) | Males (n=1456) | Females (n=898) | p Value |
|-----------------------------------|-----------------|----------------|-----------------|---------|
| Age (years)                       | 61.4±7.7        | 61.1±8.1       | 61.8±7.0        | 0.030   |
| Smoking n (%)                     | 658 (28.0)      | 456 (31.5)     | 202 (22.7)      | <0.001  |
| Alcohol (gr/week)                 | 72.2±117.5      | 102.2±133.3    | 23.6±59.9       | <0.001  |
| Physical activity (METs/min/week) | 2481±2512       | 2886±1831      | 1825±1691       | <0.001  |
| Sedentary n (%)                   | 1020 (43.3)     | 538 (37.0)     | 482 (53.7)      | <0.001  |
| Height (cm)                       | 165±9           | 170±7          | 156±6           | <0.001  |
| Weight (kg)                       | 79.4±14.6       | 83.9±13.4      | 72.2±13.3       | <0.001  |
| BMI (kg/m <sup>2</sup> )          | 29.2±4.4        | 29.1±3.9       | 29.5±5.1        | 0.035   |
| BMI ≥ 30 n (%)                    | 847 (36.0)      | 485 (33.4)     | 362 (40.4)      | 0.001   |
| Waist circumference (cm)          | 100.9±11.6      | 102.9±10.5     | 97.6±12.5       | <0.001  |
| WHtR                              | 0.61±0.07       | 0.61±0.06      | 0.62±0.08       | <0.001  |
| CUN-BAE                           | 35.7±1.7        | 31.1±4.5       | 43.1±5.1        | <0.001  |
| BRI                               | 5.8±1.7         | 5.7±1.5        | 6.1±2.1         | <0.001  |
| SBP (mmHg)                        | 137.1±17.4      | 138.9±17.1     | 134.2±17.5      | <0.001  |
| DBP (mmHg)                        | 84.4±10.2       | 85.5±10.4      | 82.7±9.7        | <0.001  |
| Heart rate (beats minutes)        | 74.2±10.2       | 73.3±12.7      | 75.8±11.6       | <0.001  |
| Hypertension n (%)                | 1712 (72.7)     | 1122 (80.1)    | 590 (75.4)      | <0.001  |
| Antihypertensive drugs n (%)      | 1199 (50.9)     | 729 (50.2)     | 470 (52.6)      | 0.289   |
| Total Cholesterol (mg/dl)         | 225.8±40.9      | 220.8±39.1     | 233.9±42.5      | <0.001  |
| LDL Cholesterol (mg/dl)           | 140.4±34.9      | 138.9±34.2     | 142.8±35.8      | 0.011   |
| HDL Cholesterol (mg/dl)           | 49.8±12.9       | 47.9±11.9      | 52.9±13.8       | <0.001  |
| Triglycerides (mg/dl)             | 145.5±96.6      | 150.3±106.3    | 137.7±77.9      | 0.001   |
| Atherogenic index                 | 4.8±1.3         | 4.8±1.3        | 4.7±1.3         | 0.002   |
| Dyslipidemia n (%)                | 2151 (91.4)     | 1311 (90.0)    | 840 (93.5)      | <0.001  |
| Lipid lowering drugs n (%)        | 671 (28.5)      | 392 (26.8)     | 279 (31.0)      | 0.034   |
| FPG (mg/dl)                       | 107.2±34.8      | 106.9±33.9     | 107.6±36.1      | 0.659   |
| HbA1c                             | 4.8±1.3         | 5.9±1.4        | 6.1±1.4         | 0.001   |
| Diabetes n (%)                    | 791 (33.6)      | 463 (31.8)     | 328 (36.5)      | 0.020   |
| Antidiabetic drugs n (%)          | 474 (20.1)      | 269 (18.5)     | 205 (22.9)      | 0.011   |
| CAVI                              | 8.8±1.2         | 8.9±1.2        | 8.6±1.1         | <0.001  |
| baPWV (m/s)                       | 14.9±2.5        | 14.8±2.5       | 15.0±2.6        | 0.107   |

Values are means and (standard deviations) for continuous data and number and (proportions) for categorical data.

Abbreviations: METs-min/week, metabolic equivalent minutes per week. BMI, body mass index. WHtR, waist-to-height ratio. CUN-BAE, Clínica Universidad de Navarra-body adiposity estimator. BRI, body roundness index. SBP, systolic blood pressure. DBP, diastolic blood pressure. LDL, low density lipoprotein. HDL, high density lipoprotein. FPG, fasting plasma glucose. HbA1c, glycosylated hemoglobin. CAVI, cardio ankle vascular index. baPWV, braquial-ankle pulse wave velocity.

p value differences between male and females

1 **Table 2: Bivariate correlations of adiposity measures with CAVI and baPWV.**

|                | CAVI       |                       | baPWV      |                       |
|----------------|------------|-----------------------|------------|-----------------------|
|                | Unadjusted | Adjusted <sup>a</sup> | Unadjusted | Adjusted <sup>a</sup> |
| <b>BMI</b>     | -0.264**   | -0.303**              | -0.035     | -0.068**              |
| <b>WHtR</b>    | -0.119**   | -0.222**              | 0.090**    | 0.001                 |
| <b>CUN-BAE</b> | -0.187**   | -0.297**              | 0.054*     | -0.063**              |
| <b>BRI</b>     | -0.125**   | -0.218**              | 0.078**    | 0.005                 |

2 The correlation coefficients between CAVI, baPWV and adiposity measurements showed  
3 significant differences (p <0.001 in all cases).

4 Abbreviations: CAVI, cardio-ankle vascular index. baPWV, brachial-ankle pulse wave velocity. BMI,  
5 body mass index. WHtR, waist-to-height ratio. CUN-BAE, Clínica Universidad de Navarra-body  
6 adiposity estimator. BRI, body roundness index.

7 <sup>a</sup> Adjusted for age, sex and systolic blood pressure.

8 p-values by Pearson correlation.\* p<0.05, \*\* p< 0.01.

9

1 **Table 3: Multiple regression analysis: association between adiposity measures with CAVI and**  
 2 **baPWV.**

|                | <b>R<sup>2</sup></b> | <b>Standardized <math>\beta</math></b> | <b>No Standardized <math>\beta</math>(95% CI)</b> | <b>Partial R<sup>2</sup></b> | <b>p value</b> |
|----------------|----------------------|----------------------------------------|---------------------------------------------------|------------------------------|----------------|
| <b>CAVI</b>    |                      |                                        |                                                   |                              |                |
| <b>BMI</b>     | 0.412                | -0.289                                 | -0.075 (-0.083 to -0.066)                         | 0.055                        | <0.001         |
| <b>WHtR</b>    | 0.381                | -0.221                                 | -3.650 (-4.207 to -3.093)                         | 0.038                        | <0.001         |
| <b>CUN-BAE</b> | 0.410                | -0.450                                 | -0.069 (-0.077 to -0.061)                         | 0.058                        | <0.001         |
| <b>BRI</b>     | 0.378                | -0.215                                 | -0.142 (-0.165 to -0.120)                         | 0.037                        | <0.001         |
| <b>baPWV</b>   |                      |                                        |                                                   |                              |                |
| <b>BMI</b>     | 0.402                | -0.100                                 | -0.057 (-0.076 to -0.038)                         | 0.007                        | <0.001         |
| <b>WHtR</b>    | 0.394                | -0.044                                 | -1.557 (-2.748 to -0.366)                         | 0.001                        | 0.021          |
| <b>CUN-BAE</b> | 0.401                | -0.152                                 | -0.050 (-0.068 to -0.033)                         | 0.007                        | <0.001         |
| <b>BRI</b>     | 0.394                | -0.046                                 | -0.066 (-0.115 to -0.018)                         | 0.002                        | 0.014          |

3 Four different multiple linear regression models were used to analyze the associations of adiposity  
 4 measures with CAVI and baPWV.

5 Adjusted for age (years), gender (0=male and 1=female), systolic blood pressure, smoking (0=No and  
 6 1=Yes), atherogenic index, HbA1c and METs/min/week.

7 Abbreviations: CAVI, cardio-ankle vascular index. baPWV, brachial-ankle pulse wave velocity. BMI,  
 8 body mass index. WHtR, waist-to-height ratio. CUN-BAE, Clínica Universidad de Navarra-body  
 9 adiposity estimator. BRI, body roundness index. METs-min/week, metabolic equivalent minutes per  
 10 week.

11  
12  
13  
14

1 **Table 4: Association between adiposity measures with CAVI in different groups.**

|                         | <b>R<sup>2</sup></b> | <b>β(95% CI)</b>          | <b>Partial R<sup>2</sup></b> | <b>p value</b> |
|-------------------------|----------------------|---------------------------|------------------------------|----------------|
|                         | <b>CAVI</b>          |                           |                              |                |
| <b>Hypertensive</b>     |                      |                           |                              |                |
| <b>BMI</b>              | 0.409                | -0.076 (-0.087 to -0.065) | 0.023                        | <0.001         |
| <b>WHtR</b>             | 0.383                | -3.838 (-4.527 to -3.148) | 0.035                        | <0.001         |
| <b>CUN-BAE</b>          | 0.368                | -0.068 (-0.078 to -0.058) | 0.051                        | <0.001         |
| <b>BRI</b>              | 0.382                | -0.165 (-0.193 to -0.137) | 0.035                        | <0.001         |
| <b>Non hypertensive</b> |                      |                           |                              |                |
| <b>BMI</b>              | 0.372                | -0.071 (-0.086 to -0.057) | 0.052                        | <0.001         |
| <b>WHtR</b>             | 0.324                | -2.939 (-3.850 to -2.028) | 0.046                        | <0.001         |
| <b>CUN-BAE</b>          | 0.405                | -0.065 (-0.080 to -0.052) | 0.080                        | <0.001         |
| <b>BRI</b>              | 0.318                | -0.108 (-0.144 to -0.072) | 0.042                        | <0.001         |
| <b>Diabetics</b>        |                      |                           |                              |                |
| <b>BMI</b>              | 0.439                | -0.087 (-0.101 to -0.073) | 0.95                         | <0.001         |
| <b>WHtR</b>             | 0.399                | -4.613 (-5.523 to -3.702) | 0.069                        | <0.001         |
| <b>CUN-BAE</b>          | 0.437                | -0.083 (-0.096 to -0.070) | 0.70                         | <0.001         |
| <b>BRI</b>              | 0.391                | -0.169 (-0.205 to -0.134) | 0.062                        | <0.001         |
| <b>Non diabetics</b>    |                      |                           |                              |                |
| <b>BMI</b>              | 0.396                | -0.067 (-0.078 to -0.056) | 0.049                        | <0.001         |
| <b>WHtR</b>             | 0.369                | -3.088 (-3.781 to -2.396) | 0.034                        | <0.001         |
| <b>CUN-BAE</b>          | 0.395                | -0.059 (-0.069 to -0.050) | 0.064                        | <0.001         |
| <b>BRI</b>              | 0.369                | -0.130 (-0.159 to -0.099) | 0.034                        | 0.016          |
| <b>Obese</b>            |                      |                           |                              |                |
| <b>BMI</b>              | 0.414                | -0.093 (-0.112 to -0.074) | 0.054                        | <0.001         |
| <b>WHtR</b>             | 0.377                | -2.945 (-4.085 to -1.804) | 0.003                        | <0.001         |
| <b>CUN-BAE</b>          | 0.418                | -0.100 (-0.122 to -0.079) | 0.026                        | <0.001         |
| <b>BRI</b>              | 0.377                | -0.110 (-0.153 to -0.069) | 0.003                        | <0.001         |
| <b>Non obese</b>        |                      |                           |                              |                |
| <b>BMI</b>              | 0.373                | -0.058 (-0.078 to -0.038) | 0.013                        | <0.001         |
| <b>WHtR</b>             | 0.361                | -1.394 (-2.366 to -0.421) | 0.003                        | 0.005          |
| <b>CUN-BAE</b>          | 0.373                | -0.050 (-0.066 to -0.033) | 0.020                        | <0.001         |
| <b>BRI</b>              | 0.358                | -0.044 (-0.085 to -0.003) | 0.002                        | 0.034          |
| <b>≤ 62 years</b>       |                      |                           |                              |                |
| <b>BMI</b>              | 0.368                | -0.078 (-0.089 to -0.077) | 0.77                         | 0.003          |
| <b>WHtR</b>             | 0.332                | -4.142 (-4.854 to -3.431) | 0.065                        | <0.001         |
| <b>CUN-BAE</b>          | 0.361                | -0.068 (-0.078 to -0.058) | 0.070                        | <0.001         |
| <b>BRI</b>              | 0.324                | -0.163 (-0.192 to -0.134) | 0.062                        | <0.001         |
| <b>&gt; 62 years</b>    |                      |                           |                              |                |
| <b>BMI</b>              | 0.234                | -0.074 (-0.088 to -0.060) | 0.056                        | <0.001         |
| <b>WHtR</b>             | 0.195                | -3.086 (-3.948 to -2.224) | 0.029                        | <0.001         |
| <b>CUN-BAE</b>          | 0.234                | -0.071 (-0.084 to -0.059) | 0.065                        | <0.001         |
| <b>BRI</b>              | 0.193                | -0.124 (-0.159 to -0.089) | 0.028                        | <0.001         |
| <b>Assets</b>           |                      |                           |                              |                |
| <b>BMI</b>              | 0.414                | -0.072 (-0.084 to -0.060) | 0.053                        | <0.001         |
| <b>WHtR</b>             | 0.392                | -3.570 (-4.335 to -2.805) | 0.034                        | <0.001         |
| <b>CUN-BAE</b>          | 0.413                | -0.066 (-0.075 to -0.053) | 0.060                        | <0.001         |
| <b>BRI</b>              | 0.391                | -0.148 (-0.180 to -0.116) | 0.034                        | <0.001         |
| <b>Sedentary</b>        |                      |                           |                              |                |
| <b>BMI</b>              | 0.408                | -0.080 (-0.092 to -0.068) | 0.055                        | <0.001         |
| <b>WHtR</b>             | 0.364                | -3.776 (-4.598 to -2.954) | 0.045                        | <0.001         |
| <b>CUN-BAE</b>          | 0.404                | -0.074 (-0.086 to -0.062) | 0.059                        | <0.001         |
| <b>BRI</b>              | 0.360                | -0.144 (-0.176 to -0.111) | 0.043                        | <0.001         |

2 Multiple linear regression models were used to analyze the associations of adiposity measures with CAVI by  
3 groups.

4 Adjusted for age (years), gender (0=male and 1=female), Systolic blood pressure, smoking (0=No and 1=Yes),  
5 atherogenic index, HbA1c and METs/min/week.

1  
2  
3 1 Abbreviations: METs-min/week, metabolic equivalent minutes per week. CAVI, cardio-ankle vascular  
4 2 index. BMI, body mass index. WHtR, waist-to-height ratio. CUN-BAE, Clínica Universidad de Navarra-body  
5 3 adiposity estimator. BRI, body roundness index.  
6 4

7  
8  
9  
10  
11  
12  
13  
14  
15  
16  
17  
18  
19  
20  
21  
22  
23  
24  
25  
26  
27  
28  
29  
30  
31  
32  
33  
34  
35  
36  
37  
38  
39  
40  
41  
42  
43  
44  
45  
46  
47  
48  
49  
50  
51  
52  
53  
54  
55  
56  
57  
58  
59  
60

For peer review only

1  
2  
3  
4  
5  
6  
7  
8  
9  
10  
11  
12  
13  
14  
15  
16  
17  
18  
19  
20  
21  
22  
23  
24  
25  
26  
27  
28  
29  
30  
31  
32  
33  
34  
35  
36  
37  
38  
39  
40  
41  
42  
43  
44  
45  
46  
47  
48  
49  
50  
51  
52  
53  
54  
55  
56  
57  
58  
59  
60

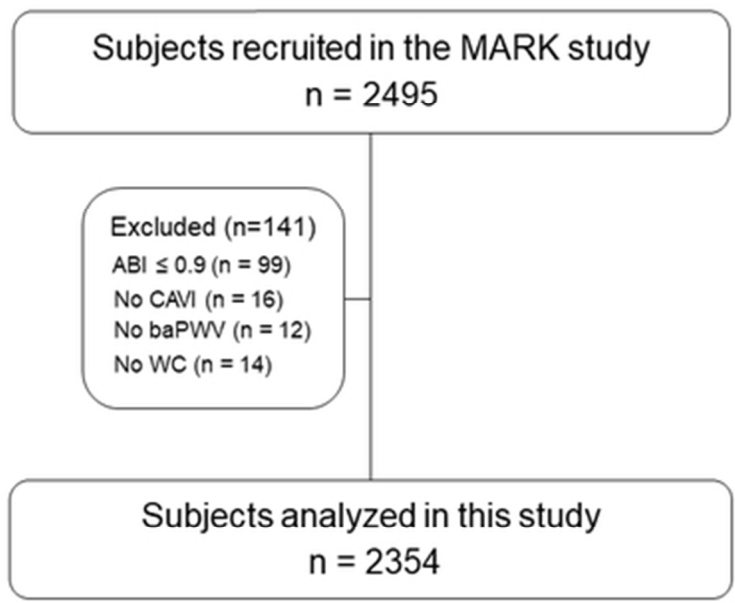

Figure 1. Flow chart of this MARK substudy  
Abbreviations: N, number; CAVI, cardio-ankle vascular index; baPWV, brachial-ankle pulse wave velocity; ABI, ankle-brachial index; WC, waist circumference

42x40mm (300 x 300 DPI)

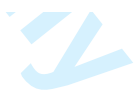

(a)

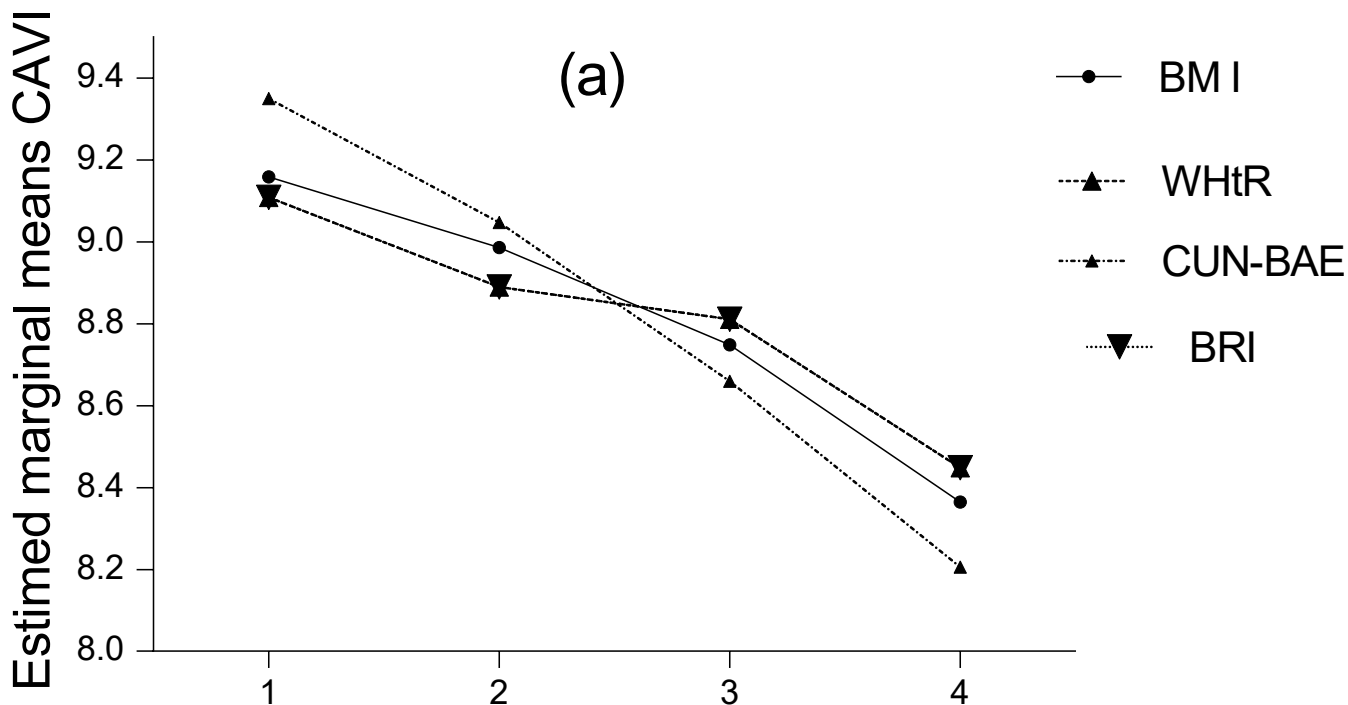

(b)



## STROBE Statement—checklist of items that should be included in reports of observational studies

|                              | Item No | Recommendation                                                                                                                                                                                                                                                                                                                                                                                                                                                                                                                                                                                                                                                                                                                               |
|------------------------------|---------|----------------------------------------------------------------------------------------------------------------------------------------------------------------------------------------------------------------------------------------------------------------------------------------------------------------------------------------------------------------------------------------------------------------------------------------------------------------------------------------------------------------------------------------------------------------------------------------------------------------------------------------------------------------------------------------------------------------------------------------------|
| <b>Title and abstract</b>    | 1       | (a) Indicate the study's design with a commonly used term in the title or the abstract<br><b>Yes, Page 1</b><br>(b) Provide in the abstract an informative and balanced summary of what was done and what was found<br><b>Yes, Page 2</b>                                                                                                                                                                                                                                                                                                                                                                                                                                                                                                    |
| <b>Introduction</b>          |         |                                                                                                                                                                                                                                                                                                                                                                                                                                                                                                                                                                                                                                                                                                                                              |
| Background/rationale         | 2       | Explain the scientific background and rationale for the investigation being reported<br><b>Yes, Page 4</b>                                                                                                                                                                                                                                                                                                                                                                                                                                                                                                                                                                                                                                   |
| Objectives                   | 3       | State specific objectives, including any prespecified hypotheses<br><b>Yes, Page 4</b>                                                                                                                                                                                                                                                                                                                                                                                                                                                                                                                                                                                                                                                       |
| <b>Methods</b>               |         |                                                                                                                                                                                                                                                                                                                                                                                                                                                                                                                                                                                                                                                                                                                                              |
| Study design                 | 4       | Present key elements of study design early in the paper<br><b>Yes, Page 5</b>                                                                                                                                                                                                                                                                                                                                                                                                                                                                                                                                                                                                                                                                |
| Setting                      | 5       | Describe the setting, locations, and relevant dates, including periods of recruitment, exposure, follow-up, and data collection<br><b>Yes, Page 5</b>                                                                                                                                                                                                                                                                                                                                                                                                                                                                                                                                                                                        |
| Participants                 | 6       | (a) <i>Cohort study</i> —Give the eligibility criteria, and the sources and methods of selection of participants. Describe methods of follow-up<br><i>Case-control study</i> —Give the eligibility criteria, and the sources and methods of case ascertainment and control selection. Give the rationale for the choice of cases and controls<br><i>Cross-sectional study</i> —Give the eligibility criteria, and the sources and methods of selection of participants<br><b>Yes, Page 5</b><br>(b) <i>Cohort study</i> —For matched studies, give matching criteria and number of exposed and unexposed<br><i>Case-control study</i> —For matched studies, give matching criteria and the number of controls per case<br><b>Yes, Page 5</b> |
| Variables                    | 7       | Clearly define all outcomes, exposures, predictors, potential confounders, and effect modifiers. Give diagnostic criteria, if applicable<br><b>Yes, Page 6</b>                                                                                                                                                                                                                                                                                                                                                                                                                                                                                                                                                                               |
| Data sources/<br>measurement | 8*      | For each variable of interest, give sources of data and details of methods of assessment (measurement). Describe comparability of assessment methods if there is more than one group<br><b>Yes, Page 6-9</b>                                                                                                                                                                                                                                                                                                                                                                                                                                                                                                                                 |
| Bias                         | 9       | Describe any efforts to address potential sources of bias<br><b>Yes, Page 8-9</b>                                                                                                                                                                                                                                                                                                                                                                                                                                                                                                                                                                                                                                                            |
| Study size                   | 10      | Explain how the study size was arrived at<br><b>Yes, Page 5</b>                                                                                                                                                                                                                                                                                                                                                                                                                                                                                                                                                                                                                                                                              |
| Quantitative variables       | 11      | Explain how quantitative variables were handled in the analyses. If applicable, describe which groupings were chosen and why<br><b>Yes, Page 8-9</b>                                                                                                                                                                                                                                                                                                                                                                                                                                                                                                                                                                                         |



- 1  
2  
3  
4  
5  
6  
7  
8  
9  
10  
11  
12  
13  
14  
15  
16  
17  
18  
19  
20  
21  
22  
23  
24  
25  
26  
27  
28  
29  
30  
31  
32  
33  
34  
35  
36  
37  
38  
39  
40  
41  
42  
43  
44  
45  
46  
47  
48  
49  
50  
51  
52  
53  
54  
55  
56  
57  
58  
59  
60
- Statistical methods 12 (a) Describe all statistical methods, including those used to control for confounding **Yes, Page 8-9**
- 
- (b) Describe any methods used to examine subgroups and interactions **Yes, Page 8-9**
- 
- (c) Explain how missing data were addressed **Yes, Page 8-9**
- 
- (d) *Cohort study*—If applicable, explain how loss to follow-up was addressed  
*Case-control study*—If applicable, explain how matching of cases and controls was addressed  
*Cross-sectional study*—If applicable, describe analytical methods taking account of sampling strategy
- 
- (e) Describe any sensitivity analyses **Yes, Page 8-9**

Continued on next page

**Results**

|                  |     |                                                                                                                                                                                                                                                                                                                                                                                                                                                     |
|------------------|-----|-----------------------------------------------------------------------------------------------------------------------------------------------------------------------------------------------------------------------------------------------------------------------------------------------------------------------------------------------------------------------------------------------------------------------------------------------------|
| Participants     | 13* | (a) Report numbers of individuals at each stage of study—eg numbers potentially eligible, examined for eligibility, confirmed eligible, included in the study, completing follow-up, and analysed <b>Yes, Page 10-11</b><br>(b) Give reasons for non-participation at each stage <b>Yes, Page 10-11</b><br>(c) Consider use of a flow diagram <b>Yes, Figure 1</b>                                                                                  |
| Descriptive data | 14* | (a) Give characteristics of study participants (eg demographic, clinical, social) and information on exposures and potential confounders <b>Yes, Page 10</b><br>(b) Indicate number of participants with missing data for each variable of interest <b>Yes, Page 10</b><br>(c) <i>Cohort study</i> —Summarise follow-up time (eg, average and total amount)                                                                                         |
| Outcome data     | 15* | <i>Cohort study</i> —Report numbers of outcome events or summary measures over time<br><i>Case-control study</i> —Report numbers in each exposure category, or summary measures of exposure<br><i>Cross-sectional study</i> —Report numbers of outcome events or summary measures                                                                                                                                                                   |
| Main results     | 16  | (a) Give unadjusted estimates and, if applicable, confounder-adjusted estimates and their precision (eg, 95% confidence interval). Make clear which confounders were adjusted for and why they were included <b>Yes, Tables</b><br>(b) Report category boundaries when continuous variables were categorized <b>Yes, tables</b><br>(c) If relevant, consider translating estimates of relative risk into absolute risk for a meaningful time period |
| Other analyses   | 17  | Report other analyses done—eg analyses of subgroups and interactions, and sensitivity analyses <b>Yes, Page 10</b>                                                                                                                                                                                                                                                                                                                                  |

**Discussion**

|                  |    |                                                                                                                                                                                                   |
|------------------|----|---------------------------------------------------------------------------------------------------------------------------------------------------------------------------------------------------|
| Key results      | 18 | Summarise key results with reference to study objectives <b>Yes, Page 11</b>                                                                                                                      |
| Limitations      | 19 | Discuss limitations of the study, taking into account sources of potential bias or imprecision. Discuss both direction and magnitude of any potential bias <b>Yes, Page 11</b>                    |
| Interpretation   | 20 | Give a cautious overall interpretation of results considering objectives, limitations, multiplicity of analyses, results from similar studies, and other relevant evidence <b>Yes, Page 11-13</b> |
| Generalisability | 21 | Discuss the generalisability (external validity) of the study results <b>Yes, Page 11</b>                                                                                                         |

**Other information**

|         |    |                                                                                                                                                                                   |
|---------|----|-----------------------------------------------------------------------------------------------------------------------------------------------------------------------------------|
| Funding | 22 | Give the source of funding and the role of the funders for the present study and, if applicable, for the original study on which the present article is based <b>Yes, Page 15</b> |
|---------|----|-----------------------------------------------------------------------------------------------------------------------------------------------------------------------------------|

\*Give information separately for cases and controls in case-control studies and, if applicable, for exposed and unexposed groups in cohort and cross-sectional studies.

**Note:** An Explanation and Elaboration article discusses each checklist item and gives methodological background and published examples of transparent reporting. The STROBE checklist is best used in conjunction with this article (freely available on the Web sites of PLoS Medicine at <http://www.plosmedicine.org/>, Annals of Internal Medicine at <http://www.annals.org/>, and Epidemiology at <http://www.epidem.com/>). Information on the STROBE Initiative is available at [www.strobe-statement.org](http://www.strobe-statement.org).
