# Supplementary material for: Adiposity measures and arterial stiffness in primary care: the MARK prospective observational study
Source: PubMed Central journal article supplement (PMC5623460; doi:10.1136/bmjopen-2017-016422), 2017-09-27

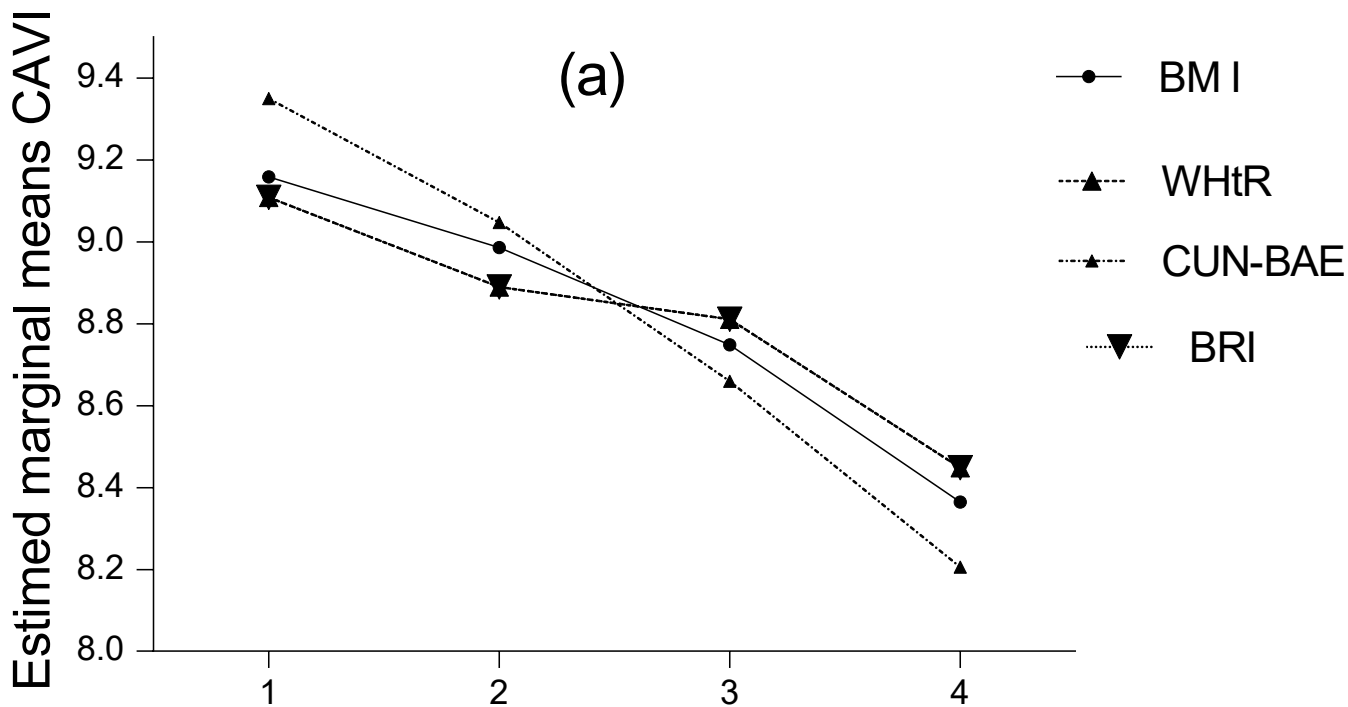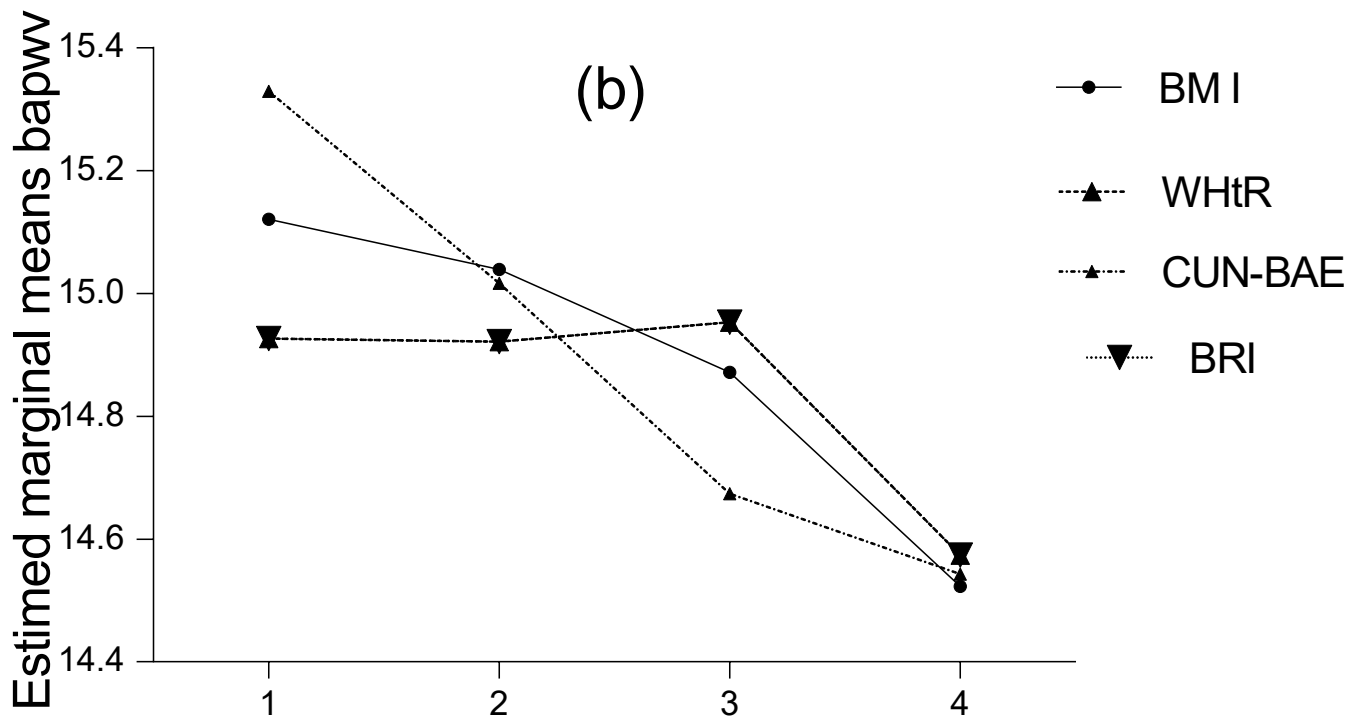

Supplement: bmjopen-2017-016422supp001.pdf [file bmjopen-2017-016422supp001.pdf]
